# Supplementary material for: The Barcelona Brain Health Initiative: Cohort description and first follow-up
Source: PLoS One. 2020 Feb 11;15(2):e0228754. doi: 10.1371/journal.pone.0228754 (PMC7012435; doi:10.1371/journal.pone.0228754)
Supplement: S1 File — (XLSX) [file pone.0228754.s001.xlsx]

## Sheet: Dataset PlosOne
id_user	age	gender	Current marital status	With whom do you live now	Educational level	Are you currently employed	Kind of job	Do you currently live in a town or city	What monthly income does your household have	Hypertension	Heartproblems	Cholesterol	Diabetesorbloodsugar	Chronicpain	Liverproblems	Cirrhosis	Pancreaticproblem	HeartAttack	SleepApnea	Arthritis	RenalDisease	Cancer	Any_Medical_Condition	PROMIS	PHQ4	Neuro_Qol	PAQ	JSEQ	MeDas	EWL	SOC	Ryff_Self	RYFF_pos_relation	Ryff_autonomy	Ryff_context	Ryff_growth	Ryff_purpose	Ryff_purpose_1	CRQ	DASS	PSQI	LSNS	CHANGESCerebralstroke	CHANGESAlzheimer´sdementiaormildcognitiveimpairment	CHANGESParkinson´sdisease	CHANGESAmyotrophiclateralsclerosis	CHANGESMultiplesclerosis	CHANGESEpilepsy	CHANGESSchizophreniapsychosis
1	50	1	1	3	3	4	4	3	4	0	0	0	0	0	0	0	0	0	0	0	0	0	0	48	15	59	6	5	ç	65	75	33	15	29	25	40	34	29	15	10	5	30
2	44	2	1	3	3	4	3	4	2	0	0	0	0	0	0	0	0	0	0	0	0	0	0	50	16	60	8	5	12	75	88	36	36	37	31	35	36	33	23	0	1	47	0	0	0	0	0	0	0
3	50	1	4	1	3	4	3	4	2	0	0	0	0	0	0	0	0	0	0	0	0	0	0	43	16	57	11	5	9	67	80	30	30	27	32	35	32	32	20	0	4	32
4	57	2	2	4	3	4	3	4	3	1	0	0	0	0	0	0	0	0	0	0	0	0	1	35	14	52	3	10	9	52	70	27	34	34	25	38	31	28	23	8	10	49
5	53	2	4	1	3	4	3	4	3	1	0	0	0	0	0	0	0	0	0	0	0	1	1	33	13	49	8	5	10	67	77	30	27	37	28	35	30	27	21	4	2	42	0	0	0	0	0	0	0
6	46	1	1	3	2	4	2	4	3	0	0	1	0	0	0	0	0	0	1	0	0	0	1	36	15	54	1	4	5	69	77	32	36	36	33	41	35	33	16	7	5	38
7	46	1	1	3	3	4	3	3	3	0	0	0	0	0	0	0	0	0	0	0	0	0	0	29	11	55	11	8	11	48	44	20	24	29	28	37	20	29	17	46	9	36
8	42	2	1	3	3	4	4	4	3	0	0	0	0	0	0	0	0	0	0	0	0	0	0	43	16	56	1	4	10									32
9	46	1	1	3	3	4	4	4	3	0	0	0	0	0	0	0	0	0	0	0	0	0	0	40	14	49	6	5	8	56	65	30	28	29	20	38	32	27	20	7	4	42
10	60	2	2	4	3	4	4	2	3	1	0	0	0	0	0	0	0	0	0	0	0	0	1	37	14	43	5	4	9	62	72	32	33	36	28	33	36	27	22	0	2	56
11	65	1	1	2	3	2		2	3	1	0	0	1	0	0	0	0	0	0	0	0	0	1	32	14	40	6	8	6	69	70	30	30	36	28	35	34	19	15	14	5	32	0	0	0	0	0	0	0
12	55	2	2	1	2	2		4	2	0	0	0	0	0	0	0	0	0	0	0	0	1	1	39	14	59	10	7	11	62	80	34	32	40	30	42	33	26	15	4	3	36	1	0	0	0	0	0	0
13	42	2	1	3	2	3	2	3	2	0	0	1	0	0	0	0	0	0	0	0	0	0	1	36	15	57	1	5	7									22
14	59	2	1	2	1	4	2	2	3	0	0	0	0	1	0	0	0	0	0	0	0	0	1	27	13	38	0	10	9	51	51	18	16	29	22	15	20	21	3	12	6	6	0	0	0	0	0	0	0
15	43	2	1	3	3	4	2	3	3	0	0	1	0	0	0	0	0	0	0	0	0	0	1	45	15	57	6	5	10	60	75	30	29	32	29	38	33	31	11	0	2	34
16	60	1	1	3	1	1		2	1	1	0	0	0	0	0	0	0	0	1	0	0	0	1	40	15	53	8	8	10	66	65	30	28	36	29	41	33	24	10	8	5	33	0	0	0	0	0	0	0
17	44	1	1	3	3	4	3	4	3	0	0	0	0	0	0	0	0	0	0	0	0	0	0	38	14	51	6	4	10	67	74	32	35	36	23	39	36	31	18	6	3	40	0	0	0	0	0	0	0
18	53	2	1	3	2	1		3	2	1	0	1	1	0	0	0	0	0	0	0	0	0	1	39	14	35	12	9	11	64	60	21	30	37	26	36	29	32	15	17	5	36	0	0	0	0	0	0	0
19	57	1	1	2	2	4	2	2	3	1	0	1	0	0	0	0	0	0	0	0	0	0	1	34	13	55	5	15	7	52	60	16	22	32	20	38	23	20	18	10	7	35	0	0	0	0	0	0	0
20	42	2	1	2	3	4	3	4	3	0	0	0	0	0	0	0	0	0	0	0	0	0	0	47	15	58	5	6	6	71	80	33	32	42	29	33	32	28	17	2	2	46	0	0	0	0	0	0	0
21	58	1	1	3	2	4	2	4	3	1	0	1	0	0	1	0	0	0	0	0	0	0	1	42	16	56	14	5	9	80	78	32	32	29	30	42	36	29	17	4	5	40
22	61	2	3	1	2	4	2	3	1	0	0	1	0	0	0	0	0	0	0	0	0	0	1	40	14	44	3	12	9	65	66	23	29	31	23	32	31	24	16	15	7	43
23	43	1	4	1	3	4	3	4	2	0	0	0	0	0	0	0	0	0	0	0	0	0	0	41	14	58	9	5	9	57	61	27	22	37	24	39	29	19	23	10	5	33
24	64	2	1	3	3	3	3	4	3	0	0	1	0	0	0	0	0	0	0	0	0	0	1	39	13	58	10	6	11	80	82	34	26	42	31	42	36	30	23	1	0	19
25	55	2	1	3	2	1		2	2	0	0	0	0	0	0	0	0	0	0	0	0	0	0	35	14	44	5	14	8	49	56	21	31	40	22	22	23	25	11	14	13	45	0	0	0	0	0	0	0
26	52	2	1	3	2	1		4	2	0	0	0	0	0	0	0	0	0	0	0	0	0	0	35	14	41	5	5	12	42	59	22	15	30	25	26	19	21	9	6	4	21
27	56	1	1	3	3	4	4	4	4	0	0	1	0	0	0	0	0	0	0	0	0	0	1	42	12	55	8	9	13	68	72	30	29	38	29	40	31	32	17	2	3	41	0	0	0	0	0	0	0
28	45	2	1	3	3	4	3	3	3	0	1	1	0	0	0	0	0	0	0	0	0	0	1	29	10	41	4	12	9	58	59	26	29	33	23	31	27	28	25	11	9	39
29	50	2	2	3	3	4	2	4	3	0	0	1	0	0	0	0	0	0	0	0	0	0	1	37	15	55	2	7	10	44	31	15	22	29	18	24	18	14	16	7	7	21
30	43	2	4	2	3	4	2	2	3	0	0	0	0	0	0	0	0	0	0	0	0	0	0	42	12	60	13	10	9	78	61	26	21	25	30	40	31	35	20	17	12	40	0	0	0	0	0	0	0
31	54	1	4	1	1	3	1	3	1	0	0	0	0	0	0	0	0	0	0	0	0	0	0	31	13	43	0	5	6	47	53	14	30	28	22	26	14	16	8	18	1	34	0	0	0	0	0	0	0
32	51	2	4	4	2	4	2	2	2	0	0	0	0	0	0	0	0	0	0	0	0	0	0	45	16	48	6	5	10	79	87	36	36	44	31	42	36	27	20	7	5	49	0	0	0	0	0	0	0
33	47	2	4	1	3	4	4	4	2	0	0	0	0	0	0	0	0	0	0	0	0	0	0	33	12	42	8	4	9	52	61	15	17	33	21	22	20	24	17	36	5	38	0	0	0	0	1	0	0
34	63	2	1	2	3	4	4	4	3	0	0	0	0	0	0	0	0	0	0	0	0	0	0	40	13	60	5	6	11	60	74	31	34	41	27	34	33	28	19	4	8	43
35	63	2	1	2	2	1		3	4	0	0	0	0	0	0	0	0	0	0	0	0	0	0	41	13	54	6	6	10	68	65	30	33	39	28	39	33	29	16	11	6	36
36	55	1	1	3	3	4	4	4	3	0	0	1	0	0	0	0	0	0	0	0	0	0	1	39	16	57	6	6	8	72	71	35	35	37	29	42	34	29	23	3	4	39	0	0	0	0	0	0	0
37	48	2	2	3	3	4	4	2	3	1	0	1	0	0	0	0	0	0	0	0	0	0	1	33	14	34	1	6	8	57	66	30	36	38	30	42	31	29	17	7	3	37	0	0	0	0	0	0	0
38	48	1	1	3	3	4	3	3	3	0	0	0	0	0	0	0	0	0	0	0	0	0	0	35	14	43	5	15	10	68	63	35	33	36	26	35	33	22	14	15	10	40	0	0	0	0	0	0	0
39	50	2	2	2	3	4	3	4	2	1	0	1	0	0	0	0	0	0	1	1	0	0	1	44	12	47	6	10	8	64	60	31	29	36	28	40	35	30	15	14	7	33	0	0	0	0	0	0	0
40	55	2	1	3	2	4	4	4	4	0	0	0	0	0	0	0	0	0	0	0	0	0	0	40	15	56	5	8	8	59	57	31	30	39	28	41	35	29	16	19	13	32	0	0	0	0	0	0	0
41	61	2	1	3	2	4	2	4	4	0	0	0	0	0	0	0	0	0	0	0	0	0	0	38	14	56	5	12	11	67	72	28	26	40	29	36	29	29	18	15	5	30
42	59	1	1	2	3	4	4	3	3	0	0	0	0	1	0	0	0	0	0	1	0	0	1	31	12	38	6	10	10	61	59	29	18	30	25	32	33	23	12	15	5	29	0	0	0	0	0	0	0
43	48	1	4	3	3	4	3	2	3	0	0	0	0	0	0	0	0	0	0	0	0	0	0	40	16	52	4	5	11	64	70	31	25	37	24	41	31	30	18	5	3	38	0	0	0	0	0	0	0
44	58	2	1	3	3	1		4	3	0	0	0	0	0	0	0	0	0	0	0	0	0	0	43	15	54	5	4	8	72	86	34	33	44	28	40	35	29	17	4	3	40
45	48	1	1	2	3	4	3	4	2	0	0	0	0	0	0	0	0	0	0	0	0	0	0	42	16	60	2	5	5	68	81	32	31	44	32	41	35	35	18	0	3	48
46	53	1	1	3	3	4	2	2	3	0	0	1	0	0	0	0	0	0	0	0	0	0	1	34	14	56	6	5	9	65	71	29	31	42	29	37	31	26	19	18	8	37
47	56	2	1	3	3	3	1	3	4	0	0	0	0	0	0	0	0	0	0	0	0	0	0	32	13	54	4	10	7									19
48	53	1	1	3	2	4	4	3	3	0	1	0	0	1	0	0	0	0	0	0	0	0	1	36	12	37	4	8	7	39	58	25	28	28	21	29	23	20	19	18	4	35
49	46	2	4	1	3	4	4	4	3	0	0	1	0	1	0	0	0	0	0	0	0	0	1	31	14	49	0	7	11	55	42	25	25	22	22	31	27	24	19	17	4	31	0	0	0	0	0	0	0
50	55	1	1	3	3	4	4	2	4	0	0	1	0	0	0	0	0	0	0	0	0	0	1	39	14	58	14	9	10	65	73	36	30	39	31	38	36	33	18	2	7	48	0	0	0	0	0	0	0
51	44	1	2	3	1	4	1	4	3	0	0	1	0	0	0	0	0	0	1	0	0	0	1	29	4	35	2	16	8	33	33	10	21	32	21	24	13	18	13	27	10	24
52	60	2	2	6	2	4	2	4	4	0	0	0	0	0	0	0	0	0	0	1	0	0	1	41	16	53	6	4	10	68	84	31	25	36	28	41	31	29	17	5	3	35
53	54	2	4	1	3	4	3	4	2	0	0	1	0	0	0	0	0	0	0	0	0	0	1	37	15	37	15	7	7	57	57	24	23	17	26	23	27	24	19	7	4	41
54	52	2	1	3	1	4	2	2	3	0	0	0	0	0	0	0	0	0	0	0	0	0	0	40	15	51	4	10	8	70	81	31	28	35	31	30	33	33	14	5	8	29	0	0	0	0	0	0	0
55	62	2	1	6	2	2		4	3	0	0	0	0	0	0	0	0	0	0	0	0	0	0	39	15	49	7	5	10	56	63	32	32	43	26	36	29	29	14	5	7	37	0	0	0	0	0	0	0
56	45	2	1	3	2	4	4	2	3	0	0	0	0	0	0	0	0	0	0	0	0	0	0	39	12	58	5	12	6	54	62	27	34	39	26	37	31	24	17	8	6	43	0	0	0	0	0	0	0
57	44	2	1	3	3	4	3	3	3	0	0	1	0	0	0	0	0	0	0	0	0	0	1	41	13	50	10	7	8	60	71	34	25	36	30	33	35	29	15	10	4	37	0	0	0	0	0	0	0
58	53	1	1	3	3	4	4	3	3	0	0	1	0	0	0	0	0	0	1	0	0	0	1	27	9	20	11	7	11	44	48	11	7	25	20	26	20	18	13	18	6	14	0	0	0	0	0	0	0
59	55	2	1	3	3	4	3	2	4	0	0	0	0	0	0	0	0	0	0	0	0	0	0	44	16	60	6	8	7	64	74	28	31	39	27	38	31	28	24	1	3	42
60	56	1	1	3	3	4	4	4	4	1	0	1	0	0	0	0	0	0	1	0	0	0	1	38	13	56	7	11	10	66	70	28	23	27	26	34	30	22	15	15	6	22
61	54	2	1	3	3	4	4	4	3	0	0	0	0	0	0	0	0	0	0	0	0	0	0	48	15	48	9	6	10	23	59	29	28	24	29	38	31	28	18	2	7	34
62	59	2	4	5	3	4	3	2	3	0	0	1	0	0	0	0	0	0	0	0	0	0	1	36	12	30	8	9	10	77	69	34	29	33	30	26	31	28			7
63	43	1	1	3	3	4	3	3	3	0	0	0	0	0	0	0	0	0	0	0	0	0	0	34	15	60	2	9	5	64	80	30	33	42	30	39	31	29	16	3	8	32	0	0	0	0	0	0	0
64	44	2	1	3	3	3	2	2	3	0	0	0	0	0	0	0	0	0	0	0	0	0	0	37	15	46	4	9	7	76	76	35	36	40	30	40	34	31	19	0	2	47	0	0	0	0	0	0	0
65	62	2	1	2	2	4	2	4	1	0	0	1	0	0	0	0	0	0	0	0	0	0	1	40	13	48	5	7	8	52	54	25	24	31	25	35	28	24	12	19	9	35	0	0	0	0	0	0	0
66	50	2	1	3	3	1		4	3	0	0	1	0	0	0	0	0	0	0	0	0	0	1	40	13	16	10	24	12	65	68	27	36	39	27	39	33	30	21	19	12	42	0	0	0	0	0	0	0
67	46	2	4	1	3	4	4	4	3	0	0	0	0	0	0	0	0	0	0	0	0	0	0	44	16	58	7	6	8	65	51	28	29	32	28	33	30	25	16	1	3	42	0	0	0	0	0	0	0
68	63	1	1	2	2	1		2	1	0	0	1	0	1	0	0	0	0	0	0	0	0	1	35	16	60	6	5	10	56	66	28	27	41	28	24	26	23	16	0	2	43	0	0	0	0	0	0	0
69	58	2	3	1	3	4	4	4	2	0	0	0	0	1	0	0	0	0	0	1	0	0	1	33	12	42	3	7	10	56	57	24	29	24	28	27	26	23	21	13	5	39
70	52	1	1	3	3	4	2	3	3	0	0	0	0	0	0	0	0	0	0	0	0	0	0	26	12	34	3	7	5	47	59	20	15	34	25	29	22	22	10	5	7	27	0	0	0	0	0	0	0
71	63	1	1	3	3	4	3	4	3	0	1	1	0	0	0	0	0	0	1	0	0	0	1	48	16	59	5	4	10	78	80	33	29	43	31	42	36	35	12	0	1	32	0	0	0	0	0	0	0
72	60	2	1	2	3	4	3	1	3	0	0	0	0	0	0	0	0	0	0	0	0	0	0	34	9	51	2	11	8	59	67	30	29	33	26	33	24	16	18	1	3	42	0	0	0	0	0	0	0
73	66	1	2	1	3	4	3	4	3	0	0	0	0	0	0	0	0	0	0	0	0	0	0	39	15	58	3	10	4	64	74	28	21	31	22	33	30	27	18	4	6	40
74	60	2	1	2	3	4	3	1	3	1	0	0	1	1	0	0	0	0	0	0	0	0	1	34	14	41	6	10	8	67	57	24	30	37	26	39	31	32	19	19	11	42	0	0	0	0	0	0	0
75	44	1	1	3	3	4	2	2	2	0	0	0	0	0	0	0	0	0	0	0	0	0	0	45	15	58	4	6	11	64	75	25	34	38	27	34	29	22	18	5	5	41
76	54	1	2	1	3	4	3	1	4	0	0	0	0	0	0	0	0	0	0	1	0	0	1	39	13	60	15	9	7	75	72	30	35	36	30	42	36	32	23	0	5	29	0	0	0	0	0	0	0
77	51	1	4	3	2	4	4	4	4	0	0	0	0	0	0	0	0	0	0	0	0	0	0	39	13	45	8	8	10	62	78	32	26	35	28	31	32	23	17	3	6	36	0	0	0	0	0	0	0
78	46	2	4	4	3	3	3	4	4	0	0	0	0	0	0	0	0	0	0	0	0	0	0	31	16	60	2	4	8	44	59	13	8	35	30	27	17	22	12	1	3	14	0	0	0	0	0	0	0
79	57	2	3	4	3	3	2	4	2	0	0	0	0	1	0	0	0	0	0	0	0	0	1	33	15	50	11	11	10	54	59	21	28	36	20	34	26	24	19	4	4	44	0	0	0	0	0	0	0
80	65	2	1	3	3	4	2	4	3	0	0	0	0	0	0	0	0	0	0	0	0	0	0	41	14	54	5	6	10	70	84	35	30	31	31	33	34	27	24	10	6	43	0	0	0	0	0	0	0
81	50	2	2	1	2	4	2	4	3	0	0	0	0	0	0	0	0	0	0	0	0	0	0	44	16	58	7	9	9	64	70	28	33	38	23	37	23	23	20	2	5	41
82	54	1	1	3	3	4	3	4	3	1	0	0	0	0	0	0	0	0	0	0	0	0	1	38	14	56	5	8	8	66	64	29	30	31	28	40	33	28	21	5	8	49
83	50	1	1	3	3	4	3	3	3	0	0	0	0	0	0	0	0	0	0	0	0	0	0	28	13	41	0	12	7	62	73	29	24	29	28	38	30	25	15	7	7	23
84	55	2	1	3	3	4	3	2	3	0	0	1	0	0	0	0	0	0	0	0	0	0	1	43	15	48	7	5	10	53	76	33	32	26	28	33	30	22	16	11	5	41	0	0	0	0	0	0	0
85	55	1	1	3	3	4	4	4	3	0	0	0	0	0	0	0	0	0	0	0	0	0	0	42	16	55	6	5	8	64	74	31	31	34	28	40	34	31	19	2	1	45	0	0	0	0	0	0	0
86	51	1	1	3	3	4	4	3	3	0	0	0	0	0	0	0	0	0	0	0	0	0	0	42	16	50	6	4	7	64	76	31	33	28	30	41	34	30	21	7	4	34
87	44	2	4	1	3	4	4	3	3	0	0	1	0	0	0	0	0	0	0	0	0	0	1	47	15	36	6	12	9	68	69	22	27	34	24	39	24	17	26	4	2	39	0	0	0	0	0	0	0
88	44	2	4	1	3	4	3	3	2	0	0	1	0	1	0	0	0	0	0	0	0	0	1	30	14	38	7	11	8	61	46	17	25	30	20	29	23	20	17	2	5	39	0	0	0	0	0	0	0
89	47	1	1	3	3	4	4	4	3	0	0	0	0	0	0	0	0	0	0	0	0	0	0	44	16	55	0	7	13	63	74	32	30	33	26	41	33	26	22	5	5	40	0	0	0	0	0	0	0
90	61	2	4	4	3	1		4	2	0	0	1	0	0	0	0	0	0	0	1	0	0	1	36	13	51	9	5	11	68	66	28	36	30	29	33	34	24	24	7	4	50
91	49	1	4	5	3	4	4	4	3	0	0	0	0	0	0	0	0	0	0	0	0	0	0	41	15	51	15	12	6	63	77	27	35	38	29	42	34	31	20	9	9	31
92	47	2	4	6	3	4	2	3	3	0	0	0	0	0	0	0	0	0	0	0	0	0	0	45	15	57	5	5	11	68	72	34	29	29	26	41	35	25	12	5	3	38	0	0	0	0	0	0	0
93	42	2	4	2	3	4	3	4	3	0	0	0	0	0	0	0	0	0	0	0	0	0	0	44	14	51	1	6	7	72	56	28	21	30	26	42	24	34	24	6	6	41
94	52	2	1	3	3	4	4	4	3	0	0	1	0	0	0	0	0	0	0	0	0	0	1	41	15	55	4	4	10	56	72	26	34	37	27	30	27	21	24	9	2	52	0	0	0	0	0	0	0
95	60	2	2	4	3	4	3	3	3	0	0	0	0	0	0	0	0	0	0	0	0	0	0	43	15	55	4	8	10	66	74	29	35	33	25	39	30	32	21	6	12	38	0	0	0	0	0	0	0
96	47	1	4	2	3	4	4	4	3	0	0	0	0	0	0	0	0	0	0	0	0	0	0	31	11	40	2	10	13	48	49	21	15	26	20	30	23	21	15	19	6	17	0	0	0	0	0	0	0
97	64	2	2	4	3	4	4	4	3	0	0	0	0	0	0	0	0	0	0	0	0	0	0	45	16	54	6	6	9	70	87	36	35	34	31	31	36	29	20	2	4	40
98	43	1	1	3	2	4	2	2	3	0	0	0	0	0	0	0	0	0	0	0	0	0	0	36	15	58	11	8	10	57	55	21	20	26	21	25	23	28	7	3	4	38
99	54	2	1	2	2	4	1	4	4	1	1	1	0	0	0	0	0	0	0	0	0	0	1	32	10	20	0	7	8	28	37	6	6	25	18	12	6	14	10	49	7	9	0	0	0	0	0	0	0
100	56	2	1	2	3	4	3	2	3	0	0	0	0	0	0	0	0	0	0	0	0	0	0	42	15	44	7	14	10	65	66	31	33	33	28	36	32	29	17	12	5	38
101	54	2	1	3	3	1		3	3	0	0	0	0	0	0	0	0	0	0	0	0	0	0	34	13	52	6	18	9	75	69	33	29	35	29	40	33	27	17	5	5	20	0	0	0	0	0	0	0
102	63	1	1	6	3	2		3	3	0	0	0	0	0	0	0	0	0	0	0	0	0	0	44	16	58	9	10	12	69	88	35	36	36	32	28	36	19	15	2	5	35	0	0	0	0	0	0	0
103	60	1	1	3	2	4	4	3	3	0	0	0	0	0	0	0	0	0	0	0	0	0	0	46	14	53	9	5	12	61	60	28	34	39	27	36	31	26	13	4	5	35	0	0	0	0	0	0	0
104	51	2	1	3	3	4	4	2	4	0	0	0	0	0	0	0	0	0	0	0	0	0	0	45	14	59	10	6	12	67	65	35	36	45	30	42	34	28	18	6	4	38	0	0	0	0	0	0	0
105	55	2	1	3	3	4	4	4	4	0	0	1	0	0	0	0	0	0	0	0	0	0	1	45	13	60	6	8	10	68	68	30	36	37	26	40	29	30	22	14	8	47	0	0	0	0	0	0	0
106	45	2	4	2	3	3	3	3	3	0	0	0	0	0	0	0	0	0	0	0	0	0	0	39	15	52	3	7	9	64	81	31	35	32	28	38	30	24	24	5	5	41
107	58	2	1	3	3	4	3	1	3	0	0	0	0	0	0	0	0	0	0	0	0	0	0	49	16	57	5	5	10	80	76	35	35	42	31	40	36	32	19	0	4	29
108	49	2	4	1	3	4	3	3	2	0	0	1	0	0	0	0	0	0	0	0	0	0	1	46	14	49	3	6	9									29
109	44	1	1	3	3	4	3	4	3	0	0	0	0	0	0	0	0	0	0	0	0	0	0	27	14	46	3	9	6	58	66	24	24	29	22	39	30	27	17	28	12	35
110	62	2	1	2	3	4	3	3	4	1	0	1	0	0	0	0	0	0	0	0	0	0	1	42	14	54	3	10	6	63	69	26	27	33	26	29	25	21	17	4	7	34	0	0	0	0	0	0	0
111	46	2	1	2	2	4	2	3	2	0	0	0	0	0	0	0	0	0	0	0	0	0	0	27	11	42	5	11	10	48	57	15	24	37	24	32	18	19	15	11	9	24	0	0	0	0	0	0	0
112	44	1	4	6	2	4	1	4	2	0	0	0	0	0	0	0	0	0	0	0	0	0	0	44	15	59	9	7	7	69	77	30	36	43	30	42	35	25	22	4	3	45
113	55	1	1	3	3	4	3	4	4	0	0	0	0	0	0	0	0	0	0	0	0	0	0	39	13	52	9	6	10	62	71	34	30	29	29	41	36	28	23	9	5	41	0	0	0	0	0	0	0
114	64	2	2	1	3	4	3	1	1	0	0	0	0	0	0	0	0	0	0	0	0	0	0	45	16	60	8	12	13									32
115	61	2	2	2	3	4	3	3	3	0	0	0	0	0	0	0	0	0	0	0	0	0	0	44	16	45	6	5	10	78	81	31	36	41	32	41	35	33	23	0	1	47
116	51	2	1	3	3	4	4	4	4	0	0	0	0	0	0	0	0	0	0	0	0	0	0	43	16	51	7	6	8	75	76	26	35	38	28	38	34	35	20	3	5	40
117	53	1	4	6	2	1		3	2	1	1	0	0	0	0	0	0	0	0	0	0	0	1	33	13	50	7	12	10									23
118	48	1	4	3	3	3	3	4	3	0	0	1	0	0	0	0	0	0	0	0	0	0	1	37	12	38	8	8	9	46	38	13	24	23	11	31	13	21	22	12	8	35	0	0	0	0	0	0	0
119	58	1	1	3	3	4	2	3	3	0	0	1	0	0	0	0	0	0	0	0	0	0	1	39	16	48	4	13	10	61	78	34	31	35	30	40	30	22	13	4	6	40	0	0	0	0	0	0	0
120	42	2	1	3	3	4	3	3	2	0	0	0	0	0	0	0	0	0	0	0	0	0	0	39	14	60	11	11	9	62	64	29	26	37	28	38	31	31	18	7	5	35
121	48	2	2	4	2	4	1	4	2	0	0	0	0	0	0	0	0	0	0	0	0	0	0	38	16	54	9	4	10	62	59	29	33	27	28	31	30	32	12	4	4	39
122	45	2	4	2	3	4	4	3	4	0	0	1	0	0	0	0	0	0	0	0	0	0	1	30	12	54	4	14	9	64	66	32	30	38	31	34	35	33
123	50	2	1	3	3	4	3	1	3	0	0	0	0	0	0	0	0	0	0	0	0	0	0	43	15	45	2	7	9	70	61	31	13	43	29	40	35	27	16	3	4	26
124	63	1	4	1	2	4	3	4	2	0	0	0	0	0	0	0	0	0	0	0	0	0	0	36	14	48	3	8	11	51	76	29	28	33	24	28	26	21	10	5	4	36	0	0	0	0	0	0	0
125	47	1	4	3	3	4	3	4	3	0	0	1	0	0	0	0	0	0	0	0	0	0	1	44	12	59	10	6	7	61	69	30	29	32	26	36	32	29	17	4	4	43	0	0	0	0	0	0	0
126	53	2	1	3	3	4	3	3	3	0	0	0	0	0	0	0	0	0	0	0	0	0	0	40	11	36	4	10	7	47	57	19	20	21	20	30	17	23	16	26	7	33	0	0	0	0	0	0	0
127	66	1	2	6	3	2		2	2	0	0	1	0	0	0	0	0	0	0	0	0	0	1	33	9	57	7	6	12	60	54	25	17	34	28	33	25	21	17	9	7	37	0	0	0	0	0	0	0
128	45	2	1	3	3	4	4	4	3	0	0	0	0	0	0	0	0	0	0	0	0	0	0	29	4	48	3	11	7	29	61	14	30	23	18	34	12	13	17	40	7	40	0	0	0	0	0	0	0
129	45	2	4	1	3	4	2	2	2	0	0	0	0	0	0	0	0	0	0	0	0	0	0	44	14	55	7	10	10	70	70	36	36	37	29	39	32	28	22	5	3	47	0	0	0	0	0	0	0
130	42	2	1	3	2	4	2	3	2	0	0	0	0	0	0	0	0	0	0	0	0	0	0	28	5	18	0	13	7									21
131	46	2	4	2	3	4	4	3	4	0	0	1	0	0	0	0	0	0	0	0	0	0	1	37	16	60	4	5	9	64	73	33	28	28	30	39	36	31	21	4	4	43
132	56	2	4	1	2	4	2	4	2	0	0	0	0	0	0	0	0	0	0	0	0	0	0	36	14	55	9	13	6	51	50	23	17	40	25	36	22	16	18	6	13	34	0	0	0	0	0	0	0
133	62	1	2	1	3	4	4	4	2	0	0	0	0	0	0	0	0	0	0	0	0	0	0	32	5	51	10	8	11	37	53	21	22	41	27	40	17	17	22	40	6	17	0	0	0	0	0	0	0
134	53	1	4	1	3	4	4	3	3	0	0	0	0	0	0	0	0	0	0	0	0	0	0	32	14	46	1	7	7	50	67	26	29	29	24	34	24	27	19	7	5	38	0	0	0	0	0	0	0
135	45	2	1	3	2	4	2	1	3	0	0	0	0	0	0	0	0	0	0	0	0	0	0	43	14	47	0	14	9	46	45	22	17	35	24	26	24	26	16	6	9	44	0	0	0	0	0	0	0
136	51	2	2	4	3	4	4	3	2	0	0	0	0	0	0	0	0	0	0	0	0	0	0	40	15	58	8	6	8	53	74	31	21	38	29	39	32	29	18	3	5	20	0	0	0	0	0	0	0
137	46	2	1	3	3	4	3	3	3	0	0	0	0	0	0	0	0	0	0	0	0	0	0	40	14	34	3	11	10	67	78	33	35	42	23	41	34	27	22	8	4	33	0	0	0	0	0	0	0
138	47	1	1	3	3	4	2	3	3	0	0	0	0	0	0	0	0	0	0	0	0	0	0	31	10	48	4	8	9	50	47	14	18	24	18	30	15	19	15	27	7	35	0	0	0	0	0	0	0
139	53	2	1	3	3	4	3	1	3	0	0	0	0	0	0	0	0	0	0	0	0	0	0	40	14	48	5	7	9	58	62	26	24	31	23	26	27	23	17	11	7	35	0	0	0	0	0	0	0
140	54	1	4	1	3	4	3	4	3	0	0	0	1	0	0	0	0	0	0	0	0	0	1	40	16	42	7	6	9	60	63	29	34	36	28	31	30	29	14	4	6	42
141	58	1	2	1	3	4	3	3	3	1	1	1	0	0	0	0	0	0	0	0	0	0	1	41	14	53	5	10	8	70	54	28	36	29	31	34	34	33	23	11	4	41	0	0	0	0	0	0	0
142	53	1	1	3	2	4	2	2	3	0	0	0	0	0	0	0	0	0	0	0	0	0	0	34	14	52	2	5	7	68	80	31	30	40	26	39	22	33	12	5	8	21	0	0	0	0	0	0	0
143	52	2	2	2	2	3	2	4	2	1	0	0	0	0	0	0	0	0	0	0	0	0	1	45	16	54	9	9	8	69	67	28	34	37	28	37	32	27	20	15	12	38	0	0	0	0	0	0	0
144	40	1	4	1	3	4	4	3	3	0	0	0	0	0	0	0	0	0	0	0	0	0	0	42	16	60	8	6	9	63	82	30	34	39	29	35	30	24	18	3	5	48
145	61	2	1	3	3	4	2	3	3	0	0	0	0	0	0	0	0	0	0	0	0	0	0	36	13	45	6	7	11	63	66	32	36	31	28	38	34	28	18	8	3	44	0	0	0	0	0	0	0
146	58	1	1	3	3	4	4	3	3	0	0	0	0	0	0	0	0	0	0	0	0	0	0	45	16	54	9	4	9	62	85	31	36	33	31	39	36	29	18	7	6	37	0	0	0	0	0	0	0
147	48	2	1	3	2	3	2	3	3	0	0	0	0	0	0	0	0	0	0	0	0	0	0	21	12	39	3	6	11	50	46	18	31	31	21	31	23	21	16	9	10	37	0	0	0	0	0	0	0
148	52	2	4	2	3	4	3	2	3	0	0	0	0	1	0	0	0	0	0	0	0	0	1	26	11	17	1	17	6									16					0	0	0	0	0	0	0
149	53	1	1	3	3	4	4	2	4	1	0	1	0	0	0	0	0	0	1	0	0	0	1	43	14	33	4	10	10	71	69	31	24	40	29	37	29	30	20	10	7	42	0	0	0	0	0	0	0
150	53	2	2	4	3	4	4	2	3	0	0	0	0	0	0	0	0	0	0	0	0	0	0	48	15	53	5	15	8	77	80	34	33	39	31	42	30	29	21	6	5	42	0	0	0	0	0	0	0
151	57	2	1	3	3	4	3	4	4	0	0	1	0	0	0	0	0	0	0	0	0	0	1	47	16	58	5	5	8	80	82	34	32	44	31	37	36	35	18	0	1	48	0	0	0	0	0	0	0
152	50	1	4	1	3	4	4	3	2	0	0	1	0	0	0	0	0	0	1	0	0	0	1	45	13	40	12	12	7									15
153	51	1	1	3	3	4	4	1	4	1	0	1	0	0	1	0	0	0	0	0	0	0	1	36	12	45	4	7	11	65	70	34	36	31	29	42	36	30			5	40
154	66	1	1	2	3	2		4	3	1	1	0	0	0	0	0	0	0	0	0	0	0	1	45	11	57	6	9	10	69	85	34	32	31	30	38	34	29	17	5	4	32	0	0	0	0	0	0	0
155	58	1	2	4	3	4	3	3	3	0	0	0	0	1	0	0	0	0	0	1	0	0	1	43	16	51	9	6	13	64	76	25	36	38	29	34	32	24	16	2	3	53	0	0	0	0	0	0	0
156	46	2	2	2	2	4	2	3	3	0	0	0	0	0	0	0	0	0	0	0	0	0	0	41	14	57	4	4	7	50	58	22	18	29	26	30	18	22	14	4	5	35	0	0	0	0	0	0	0
157	53	1	2	4	1	4	2	3	3	0	0	0	0	0	0	0	0	0	0	0	0	0	0	45	16	58	5	4	9									31
158	52	1	1	3	3	4	3	3	4	1	0	0	0	0	0	0	0	0	0	0	0	0	1	45	16	60	4	5	5	64	78	32	35	34	26	25	33	26	19	2	4	43	0	0	0	0	0	0	0
159	43	2	1	3	3	4	3	4	3	0	0	0	0	0	0	0	0	0	0	0	0	0	0	43	14	52	3	4	8	64	82	33	35	34	30	41	34	27	14	3	1	50	0	0	0	0	0	0	0
160	48	1	4	2	3	4	3	4	3	0	0	0	0	0	0	0	0	0	0	0	0	0	0	43	13	58	6	15	6	50	65	24	34	21	26	37	22	23	19	6	2	34	0	0	0	0	0	0	0
161	43	2	4	3	3	4	3	3	3	0	0	0	0	0	0	0	0	0	0	0	0	0	0	38	12	38	0	15	8	62	54	27	27	28	23	36	29	27	18	11	5	37
162	49	2	1	3	3	4	3	4	3	0	0	0	0	0	0	0	0	0	0	0	0	0	0	48	16	57	8	4	11	66	71	32	36	37	29	40	35	30	26	0	2	51	0	0	0	0	0	0	0
163	43	2	4	3	3	4	4	4	4	0	0	0	0	0	0	0	0	0	0	0	0	0	0	47	16	60	4	5	9	65	76	33	35	35	28	35	30	25	16	1	5	39	0	0	0	0	0	0	0
164	59	2	1	2	3	4	3	4	3	0	0	0	0	1	0	0	0	0	0	0	0	1	1	34	16	53	3	10	11	60	84	27	23	43	30	28	29	17	14	4	3	24	0	0	0	0	0	0	0
165	57	1	1	3	2	4	1	4	3	0	0	0	1	0	0	0	0	0	0	0	0	0	1	41	13	51	4	5	5	50	54	24	24	27	20	28	24	18	14	9	7	40	0	0	0	0	0	0	0
166	48	2	1	2	2	4	2	2	3	0	0	0	0	0	0	0	0	0	0	0	0	0	0	45	15	58	14	6	9	59	72	36	27	46	32	40	34	26	15	6	5	33	0	0	0	0	0	0	0
167	63	2	2	6	2	3	1	2	3	0	0	1	0	1	0	0	0	0	0	0	0	0	1	39	12	38	2	17	5	58	42	16	32	39	21	30	17	19	13	30	12	41	0	0	0	0	0	0	0
168	59	2	2	4	1	4	2	3	2	0	0	0	0	0	0	0	0	0	0	0	0	0	0	40	15	58	2	7	9	62	78	34	31	42	29	36	34	28	16	5	8	42	0	0	0	0	0	0	0
169	58	2	4	1	3	4	2	2	4	0	0	1	0	0	0	0	0	0	0	0	0	0	1	29	11	43	1	9	7	56	64	18	15	35	25	24	20	19	17	4	3	22	0	0	0	0	0	0	0
170	46	2	4	2	3	4	3	3	2	0	0	0	0	0	0	0	0	0	0	0	0	0	0	41	13	58	6	7	10	65	79	31	27	30	29	40	28	18	16	17	3	41	0	0	0	0	0	0	0
171	50	1	1	3	2	4	2	3	3	0	0	1	1	0	0	0	0	0	0	0	0	0	1	39	16	57	5	4	9	64	74	23	24	34	27	31	28	28	13	0	5	25	0	0	0	0	0	0	0
172	60	1	2	3	3	4	3	4	3	0	0	0	0	0	0	0	0	0	0	0	0	0	0	34	13	51	0	6	7	56	68	24	22	37	23	31	18	18	15	10	6	33	0	0	0	0	0	0	0
173	60	2	1	3	2	1		3	2	0	0	0	0	1	0	0	0	0	0	1	0	0	1	44	13	49	6	8	9	66	71	32	32	37	27	25	32	33	14	9	4	40
174	57	1	1	2	2	4	2	3	4	1	0	0	0	0	0	0	0	0	0	0	0	0	1	41	14	54	3	5	7	56	57	23	21	33	21	26	25	16	11	7	5	29
175	56	2	4	2	3	4	2	4	3	0	0	1	0	0	0	0	0	0	0	0	0	0	1	44	14	57	6	10	6	72	71	31	17	32	25	38	29	24	17	4	9	33	0	0	0	0	0	0	0
176	43	2	1	3	2	4	2	3	3	0	0	0	0	0	0	0	0	0	0	0	0	0	0	45	15	60	4	4	10	75	79	32	36	42	28	38	27	34	19	6	1	48	0	0	0	0	0	0	0
177	48	1	1	3	3	4	3	3	3	0	0	0	0	0	0	0	0	0	0	0	0	0	0				5	8	12	64	67	29	27	34	27	32	31	26
178	53	2	2	2	3	4	3	4	3	0	0	0	0	0	0	0	0	0	0	0	0	0	0	42	15	38	3	13	12	71	80	34	35	39	28	36	36	31	21	6	5	52	0	0	0	0	0	0	0
179	44	2	4	3	3	4	3	4	3	0	0	0	0	0	0	0	0	0	0	0	0	0	0	39	15	46	1	6	8	64	72	30	30	33	28	34	30	22	19	4	3	47	0	0	0	0	0	0	0
180	51	2	1	3	3	4	3	4	3	1	1	0	1	0	0	0	0	0	1	0	0	0	1	34	15	56	6	5	7	70	74	25	21	32	29	28	32	28	14	20	3	24
181	43	2	1	3	3	3	2	3	3	0	0	0	0	0	0	0	0	0	0	0	0	0	0	44	16	55	2	13	9	64	84	34	33	40	22	41	34	30	22	5	5	52	0	0	0	0	0	0	0
182	57	2	4	1	3	4	4	4	3	1	0	1	0	0	0	0	0	0	0	0	0	0	1	47	15	57	2	5	9	58	74	26	26	41	27	29	25	21	17	3	1	34	0	0	0	0	0	0	0
183	59	2	2	4	3	4	3	2	2	0	0	0	0	0	0	0	0	0	0	0	0	0	0	35	14	53	5	6	10	59	66	18	24	32	28	37	19	23	20	4	5	36
184	43	2	4	3	2	4	2	3	3	0	0	0	0	0	0	0	0	0	0	0	0	0	0	36	14	40	6	12	7	61	55	29	28	19	16	34	25	19	14	9	6	31	0	0	0	0	0	0	0
185	63	2	1	3	3	4	4	4	3	0	0	0	0	1	0	0	0	0	1	1	0	0	1	35	16	51	6	16	10	74	83	31	31	28	30	40	36	33	22	2	6	52	0	0	0	0	0	0	0
186	49	2	1	3	3	4	2	2	3	1	0	0	0	1	0	0	0	0	0	0	0	0	1	20	11	17	2	19	8	49	55	16	21	25	21	31	26	21	20	21	9	33	0	0	0	0	0	0	0
187	54	2	4	4	3	4	4	2	2	0	0	0	0	1	0	0	0	0	0	0	0	0	1	32	15	56	0	7	9	61	78	25	35	34	28	41	27	30	20	12	4	35
188	55	2	1	3	3	4	4	3	3	0	0	0	0	0	0	0	0	0	0	0	0	0	0	30	12	55	5	10	6	56	54	25	12	38	24	33	28	23	19	10	6	17	0	0	0	0	0	0	0
189	46	1	2	4	2	4	1	4	2	1	0	0	0	0	0	0	0	0	1	0	0	0	1	40	15	46	6	4	5	56	66	30	29	31	25	35	26	27	13	12	7	31	0	0	0	0	0	0	0
190	62	2	2	1	2	4	2	2	2	0	0	0	0	0	0	0	0	0	0	0	0	0	0	47	16	50	2	6	9	73	83	31	35	44	31	42	34	29	18	5	2	51	0	0	0	0	0	0	0
191	49	2	1	4	3	4	3	2	3	0	0	0	0	1	0	0	0	0	0	0	0	0	1	31	15	47	0	11	9	77	81	33	30	36	31	38	36	29	21	8	6	40	0	0	0	0	0	0	0
192	54	2	1	3	3	4	4	2	3	0	0	0	0	0	0	0	0	0	0	0	0	0	0	37	12	44	1	9	7	59	54	28	27	32	29	36	29	22	23	5	3	43	0	0	0	0	0	0	0
193	59	1	1	3	2	4	2	4	3	0	0	0	0	0	0	0	0	0	0	0	0	0	0	38	15	51	3	14	6	70	56	28	35	39	24	34	31	24	22	14	5	36	0	0	0	0	0	0	0
194	60	2	4	3	3	4	4	4	3	0	0	1	0	0	0	0	0	0	0	0	0	0	1	43	14	56	7	8	7	70	80	34	35	42	28	41	33	32	22	13	5	46	0	0	0	0	0	0	0
195	47	2	4	2	3	4	2	2	4	0	0	1	0	1	0	0	0	0	0	0	0	0	1	28	8	35	6	15	8	49	53	15	30	26	25	32	13	12	17	17	7	41
196	42	1	4	2	3	4	3	4	3	0	0	0	0	0	0	0	0	0	0	0	0	0	0	36	13	41	8	19	4	31								31
197	61	2	1	2	3	4	2	3	3	0	0	0	0	0	0	0	0	0	0	0	0	0	0	32	13	27	9	15	8	66	71	24	20	34	21	30	22	14	13	8	5	29	0	0	0	0	0	0	0
198	52	1	1	3	3	4	4	3	3	0	1	0	0	0	1	0	0	0	1	1	0	0	1	41	14	40	9	13	11	60	73	30	25	32	26	33	32	31	16	9	7	37	0	0	0	0	0	0	0
199	53	2	1	3	3	4	4	4	3	1	0	0	0	0	0	0	0	0	0	0	0	0	1	40	13	55	14	7	8	61	61	31	36	39	26	32	33	25	22	6	3	49	0	0	0	0	0	0	0
200	47	1	1	3	3	4	4	2	3	0	0	1	0	0	0	0	0	0	0	0	0	0	1	35	11	45	6	6	6	55	43	19	25	30	24	32	26	22	16	26	6	29	0	0	0	0	0	0	0
201	43	2	1	3	2	1		3	1	0	0	0	0	0	0	0	0	0	0	0	0	0	0	21	11	32	1	12	8	59	53	27	21	35	23	40	29	24	16	15	5	24	0	0	0	0	0	0	0
202	52	2	2	4	3	4	3	2	2	0	0	0	0	0	0	0	0	0	0	0	0	0	0	38	14	58	2	5	6	59	52	24	15	27	24	33	30	27	17	10	4	18
203	58	2	1	2	3	4	3	4	3	0	0	0	0	0	0	0	0	0	0	0	0	0	0	41	15	57	7	5	8	64	67	30	30	30	22	33	28	21	23	4	5	48	0	0	0	0	0	0	0
204	48	2	1	3	3	4	4	3	3	0	0	0	0	0	0	0	0	0	0	0	0	0	0	48	16	58	3	11	8	75	86	36	22	38	31	40	36	34	20	0	3	22	0	0	0	0	0	0	0
205	57	2	4	1	3	4	3	4	2	0	0	0	0	0	0	0	0	0	0	0	0	0	0	44	16	56	11	6	10	57	71	28	36	38	25	31	29	24	25	0	3	48	0	0	0	0	0	0	0
206	56	2	1	3	3	3	3	2	3	0	0	0	0	0	0	0	0	0	0	0	0	0	0	40	12	59	2	12	10									30
207	43	2	4	2	3	4	2	4	3	0	0	0	0	1	0	0	0	0	0	0	0	0	1	31	12	40	6	10	8	54	67	25	36	42	23	41	27	21	24	15	7	40	0	0	0	0	0	0	0
208	54	1	1	3	3	4	3	4	3	0	0	0	0	0	0	0	0	0	0	0	0	0	0	42	12	58	15	5	7	57	66	25	29	35	29	42	31	27	22	1	5	29	0	0	0	0	0	0	0
209	62	1	2	4	3	4	3	3	2	0	0	0	0	0	0	0	0	0	0	0	0	0	0	41	15	59	4	8	11	62	71	28	25	35	28	36	27	27	16	7	7	26
210	54	1	2	4	1	4	2	4	4	1	0	0	0	0	1	0	0	0	1	0	0	0	1	41	12	49	5	11	10	51	53	24	36	25	21	41	27	30	16	19	6	45
211	59	1	1	3	3	4	3	4	3	0	0	0	0	0	0	0	0	0	0	0	0	0	0	36	16	50	4	5	10	58	77	27	26	37	27	26	31	29	13	0	3	12
212	54	2	3	4	3	4	3	3	3	0	0	0	0	1	0	0	0	0	0	0	0	0	1	37	15	58	5	8	6	77	75	31	36	42	29	39	35	29	18	7	5	47
213	59	2	1	2	3	4	3	3	3	0	1	0	0	0	0	0	0	0	0	0	0	0	1	34	15	54	8	9	10	67	75	31	24	26	29	37	36	29	22	15	11	29	0	0	0	0	0	0	0
214	60	2	1	2	3	2		4	3	1	0	0	0	0	0	0	0	0	1	0	0	0	1	30	14	27	12	9	12	64	76	33	26	35	32	37	36	27	15	1	9	24	0	0	0	0	0	0	0
215	46	2	1	3	3	4	4	4	3	0	0	0	0	0	0	0	0	0	0	0	0	0	0	44	16	56	2	5	9	74	84	34	35	40	29	34	35	30	19	4	5	40	0	0	0	0	0	0	0
216	43	1	1	3	3	4	3	3	4	0	0	0	0	0	0	0	0	0	0	0	0	0	0	48	16	60	5	9	7									27
217	44	2	1	2	3	2		4	3	0	0	0	0	0	0	0	0	0	0	0	0	0	0	32	14	55	6	9	7	64	77	33	28	43	31	40	36	31	16	2	6	25	0	0	0	0	0	0	0
218	43	2	4	2	3	1		3	3	0	0	0	0	1	0	0	0	0	0	0	0	0	1	25	13	45	7	18	8	34	66	14	33	26	30	35	20	30	20	12	13	35	0	0	0	0	0	0	0
219	58	1	1	3	3	4	3	4	4	0	0	1	0	0	0	0	0	0	0	0	0	0	1	37	15	56	1	11	13	59	61	29	36	40	31	32	29	23	16	4	5	40	0	0	0	0	0	0	0
220	66	2	1	2	3	2		3	3	0	0	0	0	0	0	0	0	0	0	0	0	0	0	40	13	55	8	5	11	49	56	22	20	30	18	28	28	22	23	4	5	35	0	0	0	0	0	0	0
221	59	2	1	3	3	4	3	3	3	0	0	1	0	0	0	0	0	0	0	0	0	0	1	45	16	54	15	6	9	73	72	32	28	27	26	28	29	28	23	8	2	43	0	0	0	0	0	0	0
222	54	1	1	3	3	4	4	3	4	0	0	0	0	0	0	0	0	0	0	0	0	0	0	46	13	56	4	6	9	54	69	31	20	40	27	37	31	28	20	5	3	25	0	0	0	0	0	0	0
223	47	1	1	3	3	4	4	4	3	0	0	0	0	0	0	0	0	0	0	0	0	0	0	50	16	48	13	4	13	67	76	32	32	29	29	41	30	28	21	0	2	40	0	0	0	0	0	0	0
224	58	2	2	1	3	1		3	1	0	0	0	0	0	0	0	0	0	0	0	0	0	0	43	16	60	7	9	11	80	86	27	36	41	31	42	32	28	17	11	9	33
225	59	1	1	2	2	4	2	3	3	0	0	1	0	0	0	0	0	0	0	0	0	0	1	37	16	43	8	5	9	66	64	33	21	30	30	31	30	28	13	1	4	35	0	0	0	0	0	0	0
226	45	1	1	3	3	4	2	4	2	0	1	0	0	0	0	0	0	0	0	0	0	0	1	35	15	54	6	8	9	57	83	28	25	41	30	37	33	28	18	19	5	17
227	43	2	1	2	3	4	2	4	3	0	0	0	0	0	0	0	0	0	0	0	0	0	0	44	14	60	3	7	11	64	58	30	26	44	26	38	36	31	12	10	5	20
228	64	2	2	6	3	3	3	4	2	0	0	0	0	0	0	0	0	0	0	0	0	0	0	41	15	56	10	5	9	58	72	30	35	41	30	42	31	31	23	4	4	46	0	0	0	0	0	0	0
229	63	1	1	3	3	1		2	4	0	0	0	0	0	0	0	0	0	0	0	0	0	0	35	13	55	5	5	10									27
230	59	1	1	2	3	3	3	4	3	0	0	0	0	0	0	0	0	0	0	0	0	0	0	36	12	48	5	6	5	51	28	22	19	36	16	26	23	29	18	35	11	16	0	0	0	0	0	0	0
231	42	2	4	3	3	4	3	3	3	0	0	1	0	0	0	0	0	0	0	0	0	0	1	42	15	59	3	7	8	61	67	29	26	33	27	33	31	29	20	5	5	38	0	0	0	0	0	0	0
232	53	2	4	4	3	4	4	4	3	0	0	0	0	0	0	0	0	0	0	0	0	0	0	37	13	60	7	6	8	53	65	27	23	27	27	39	32	28	18	6	3	42	0	0	0	0	0	0	0
233	58	2	1	3	3	4	4	4	4	0	0	0	0	0	0	0	0	0	0	0	0	0	0	42	15	57	9	8	9	58	54	19	26	33	21	34	26	28	19	22	7	37
234	50	2	1	3	3	4	2	4	3	0	0	0	0	0	0	0	0	0	0	0	0	0	0	34	15	59	4	8	10	61	71	31	20	29	29	41	34	31	15	8	6	22	0	0	0	0	0	0	0
235	42	2	4	3	3	4	3	4	3	0	0	0	0	0	0	0	0	0	0	0	0	0	0	32	13	47	8	6	7	55	63	27	29	30	24	33	25	27	21	7	5	32
236	66	1	1	2	3	4	3	3	3	0	0	1	0	0	0	0	0	0	0	0	0	0	1	44	16	52	5	7	10	72	70	32	30	33	28	29	29	19	16	3	4	40
237	64	1	1	3	3	2		3	3	0	0	1	0	0	0	0	0	0	0	0	0	1	1	47	14	57	9	6	9	73	68	31	30	42	29	39	34	23	21	1	2	35
238	56	2	1	3	3	1		3	2	0	0	0	0	0	0	0	0	0	0	0	0	0	0	43	13	57	8	8	11	67	76	29	19	42	29	42	35	27	16	7	7	36
239	60	2	1	2	3	4	3	4	3	0	0	0	0	0	0	0	0	0	0	0	0	0	0	32	14	53	4	8	10	53	54	23	19	29	23	40	28	21	15	8	6	26	0	0	0	0	0	0	0
240	52	1	1	3	3	4	4	4	4	1	0	0	0	0	0	0	0	0	0	0	0	0	1	44	16	52	6	4	10	64	71	25	30	32	21	34	27	30	20	1	1	41	0	0	0	0	0	0	0
241	54	1	1	2	3	4	4	4	4	0	0	1	0	0	0	0	0	0	0	0	0	0	1	45	15	56	1	7	11	57	77	35	33	39	29	40	34	29	20	1	6	34	0	0	0	0	0	0	0
242	58	1	1	3	2	4	2	4	3	0	0	0	0	0	0	0	0	0	0	0	0	0	0	28	12	46	5	7	7	63	79	31	32	38	28	39	35	29	15	5	5	27	0	0	0	0	0	0	0
243	48	2	4	4	3	4	4	3	3	0	0	0	0	0	0	0	0	0	0	0	0	0	0	34	10	45	5	5	11	63	61	33	35	28	29	42	36	29	23	11	7	44	0	0	0	0	0	0	0
244	47	1	1	3	3	4	4	2	3	0	0	1	0	0	0	0	0	0	0	0	0	0	1	43	16	47	6	7	10	63	68	34	29	37	27	35	33	27	15	4	4	34	0	0	0	0	0	0	0
245	42	1	1	3	3	4	4	1	3	0	0	0	0	0	0	0	0	0	0	0	0	0	0	48	16	60	6	4	11	77	82	36	36	43	31	42	36	32	21	5	0	43	0	0	0	0	0	0	0
246	58	2	2	4	3	4	4	4	3	0	0	0	0	0	0	0	0	0	0	0	0	0	0	35	13	55	3	8	10	63	76	26	25	30	29	28	22	28	21	7	5	38	0	0	0	0	0	0	0
247	45	2	1	3	3	3	3	3	3	0	0	0	0	0	0	0	0	0	0	0	0	0	0	43	16	56	0	6	6	67	68	33	36	28	28	33	34	29	24	6	2	49
248	61	2	2	6	3	1		4	1	0	0	0	0	0	0	0	0	0	0	0	0	0	0	40	12	44	4	7	8	79	83	31	36	43	31	42	36	27	18	0	7	46	0	1	0	0	0	0	0
249	42	2	2	4	3	4	3	4	3	0	0	0	0	0	0	0	0	0	0	0	0	0	0	39	10	43	6	11	6	58	59	23	24	27	23	37	29	30
250	45	2	1	3	3	4	3	4	3	0	0	0	0	0	0	0	0	0	0	0	0	0	0	36	12	30	3	14	7	51	47	26	28	28	26	33	18	27	19	12	7	46
251	62	1	3	1	3	2		4	3	0	1	0	0	0	0	0	0	0	0	0	0	0	1	33	13	42	9	17	12	61	63	19	13	34	21	24	22	16	12	11	6	37	0	0	0	0	0	0	0
252	55	2	1	3	3	4	4	4	3	0	0	0	0	1	0	0	0	0	0	1	0	0	1	42	12	44	7	15	9	65	78	36	36	37	31	40	36	26	19	9	7	53	0	0	0	0	0	0	0
253	61	1	1	2	3	4	4	3	3	0	0	0	0	1	0	0	0	0	0	0	0	0	1	46	16	58	8	6	12	69	86	34	34	40	32	42	34	33	24	1	2	51	0	0	0	0	0	0	0
254	49	2	1	3	3	4	4	4	3	0	0	0	0	0	0	0	0	0	0	0	0	0	0	45	16	60	8	7	9	78	89	31	34	43	31	39	36	30	21	4	7	37
255	46	1	1	3	3	4	4	3	4	0	0	0	0	0	0	0	0	0	0	0	0	1	1	41	16	58	9	5	8	64								33
256	53	2	1	3	3	4	4	3	3	0	0	0	0	0	0	0	0	0	0	1	0	0	1	42	13	53	6	10	10	67	69	30	33	32	24	37	29	29	23	15	5	36	0	0	0	0	0	0	0
257	43	1	1	2	2	4	1	3	2	0	0	0	0	0	0	0	0	0	0	0	0	0	0	44	13	59	14	6	12	58	80	30	30	35	28	40	26	21	12	0	3	48	0	0	0	0	0	0	0
258	58	2	1	3	3	4	4	3	3	0	1	0	0	0	0	0	0	1	0	0	0	0	1	25	4	42	5	12	6	45	41	14	36	19	20	27	18	20	25	36	11	53
259	62	2	2	1	2	3	2	1	1	0	1	1	0	1	0	0	0	0	0	0	0	0	1	32	13	45	3	5	10	59	67	29	19	31	23	34	26	25	15	15	5	14	0	0	0	0	0	0	0
260	49	1	2	1	3	4	3	4	4	0	0	0	0	0	0	0	0	0	0	0	0	0	0	38	13	54	11	6	8	56	54	27	20	34	24	39	22	27	19	11	6	28	0	0	0	0	0	0	0
261	49	1	1	3	3	4	4	3	4	0	0	0	0	0	0	0	0	0	0	0	0	0	0	43	16	46	6	4	7	67	61	24	31	41	24	40	35	29	16	3	5	39
262	55	1	1	3	3	4	3	4	4	0	0	1	0	0	0	0	0	0	0	0	0	0	1	43	14	60	6	6	8	63	66	31	22	22	29	31	28	24	22	5	5	23	0	0	0	0	0	0	0
263	50	2	1	2	3	4	3	3	3	0	0	0	0	0	0	0	0	0	0	0	0	0	0	39	12	54	9	6	9	70	72	30	28	40	31	40	35	30	24	3	4	52
264	53	2	1	3	3	4	3	4	3	0	0	0	0	1	0	0	0	0	0	0	0	0	1	34	13	40	4	14	10	60	60	30	21	37	28	30	30	28	18	15	13	29	0	0	0	0	0	0	0
265	66	2	1	3	3	2		4	3	0	0	1	0	0	0	0	0	0	0	0	0	0	1	44	16	53	0	6	10									20
266	48	2	4	1	3	4	4	4	4	0	0	0	0	0	0	0	0	0	0	0	0	0	0	39	14	46	3	11	8	52	56	28	23	43	22	35	22	23	20	5	5	41
267	46	2	4	6	3	4	3	4	3	0	0	0	1	0	0	0	0	0	0	0	0	0	1	45	14	55	2	5	11	54	70	31	36	38	26	32	28	25	25	10	4	52	0	0	0	0	0	0	0
268	59	2	4	3	2	4	2	4	3	0	0	0	0	1	0	0	0	0	0	0	0	0	1	35	13	41	4	10	9	63	63	29	23	34	20	29	30	26	17	10	7	29	0	0	0	0	0	0	0
269	40	2	2	4	3	4	3	3	2														0						7	65								25
270	61	2	4	1	3	1		4	3	0	0	1	1	0	0	0	0	0	0	0	0	0	1	43	15	59	11	6	12	80	88	34	33	43	31	42	36	32	17	10	3	35
271	58	2	1	3	3	4	2	4	3	0	0	0	0	1	0	0	0	0	0	0	0	0	1	30	12	36	6	8	10	56	78	29	31	33	30	42	25	27	13	9	5	34
272	44	2	1	3	3	4	4	4	4	0	0	0	0	0	0	0	0	0	0	0	0	0	0	45	13	54	4	8	11	73	64	33	33	40	28	37	33	29	21	2	7	44	0	0	0	0	0	0	0
273	58	2	1	2	3	4	4	3	4	0	0	0	0	0	0	0	0	0	0	0	0	0	0	37	14	58	2	13	10	62	80	32	18	38	27	35	31	34	15	7	10	36	0	0	0	0	0	0	0
274	59	2	4	1	3	4	4	4	3	0	0	0	0	0	0	0	0	0	0	0	0	0	0	30	15	59	0	13	9	60	72	27	26	42	25	34	28	24	12	18	10	21	0	0	0	0	0	0	0
275	42	2	4	1	3	4	4	2	3														0	44	14	50	14	4	8	55	76	30	34	37	27	36	31	29	25	3	2	47	0	0	0	0	0	0	0
276	44	1	4	1	3	4	3	2	2	0	0	1	0	0	0	0	0	0	0	0	0	0	1	35	13	46	5	9	7	65	57	29	25	37	26	36	27	23	19	9	6	33	0	0	0	0	0	0	0
277	44	1	4	2	3	1		4	4	1	0	0	0	0	0	0	0	0	0	0	0	0	1				1	5	12	69	70	34	30	33	30	40	35	35	21	11	4	41
278	45	1	1	2	2	4	4	2	3	0	0	0	0	0	0	0	0	0	0	0	0	0	0	44	16	55	7	5	6	64	90	36	29	38	26	42	36	31	24	0	2	41
279	58	2	1	3	3	4	4	3	4	1	0	1	0	0	0	0	0	0	0	0	0	0	1	33	11	43	5	12	6	61	56	28	18	20	20	42	32	27	14	19	7	31	0	0	0	0	0	0	0
280	46	1	1	2	3	4	4	4	4	0	0	0	0	0	0	0	0	0	0	0	0	0	0	47	16	56	10	5	13	77	73	35	27	33	29	31	30	31	24	7	4	48	0	0	0	0	0	0	0
281	53	2	3	6	3	3	3	4	3	0	0	0	0	0	0	0	0	0	0	0	0	0	0	36	13	59	9	6	9	58	68	28	33	43	23	37	29	18	15	9	8	32
282	51	2	1	3	3	4	2	2	3	0	0	1	0	1	0	0	0	0	0	0	0	0	1	38	16	56	4	4	6	54	72	27	32	28	25	28	30	23	11	4	7	29	0	0	0	0	0	0	0
283	53	1	1	3	3	4	3	2	4	0	0	1	0	0	0	0	0	0	0	0	0	0	1	42	16	54	7	4	11	79	68	34	32	36	31	39	34	26	18	0	4	38
284	49	2	1	3	3	4	4	3	3	0	0	0	0	0	0	0	0	0	0	0	0	0	0	38	14	50	4	7	9	72	80	32	34	40	29	41	35	34	23	15	8	44	0	0	0	0	0	0	0
285	46	2	1	2	3	4	3	3	2	0	0	0	0	0	0	0	0	0	0	1	0	0	1	37	12	41	6	11	7	69	57	28	27	43	27	37	32	26	16	11	8	36
286	51	1	1	3	2	4	2	2	3	0	0	0	0	0	0	0	0	0	0	0	0	0	0	38	16	60	0	12	10	64	86	35	35	38	30	38	33	18	19	0	1	35
287	43	1	1	3	3	4	4	2	3	0	0	0	0	0	0	0	0	0	0	0	0	0	0	46	15	58	7	7	11	75	71	30	30	35	27	38	35	30	21	2	2	47	0	0	0	0	0	0	0
288	54	2	2	1	3	4	4	4	3	0	0	0	0	0	0	0	0	0	0	0	0	0	0	38	15	52	10	8	10	59	77	34	21	37	27	39	35	28	15	10	4	44	0	0	0	0	0	0	0
289	57	2	1	4	3	4	4	2	4	0	0	0	0	0	0	0	0	0	0	0	0	0	0	36	14	52	4	9	11	50	67	26	19	28	24	41	23	26	14	0	2	37	0	0	0	0	0	0	0
290	57	2	4	4	3	4	3	3	3	1	0	1	0	0	0	0	0	0	1	0	0	0	1	40	12	51	1	8	8	67	67	34	35	33	29	39	33	32	20	1	6	44	0	0	0	0	0	0	0
291	52	2	1	2	2	4	2	4	3	0	0	0	0	0	0	0	0	0	0	0	0	0	0	44	16	55	3	6	10	67	78	27	25	34	28	38	32	32	13	3	5	35	0	0	0	0	0	0	0
292	42	1	1	3	3	4	4	3	2	0	0	0	0	0	0	0	0	0	0	0	0	0	0	43	16	55	8	5	10	47	69	25	31	35	26	34	23	22			3	38
293	47	1	2	1	3	4	4	4	3	0	0	0	0	0	0	0	0	0	0	0	0	0	0	39	13	50	11	9	7	62	70	30	30	26	24	37	26	26	15	4	6	33	0	0	0	0	0	0	0
294	47	1	1	2	3	4	3	4	3	0	0	0	0	0	0	0	0	0	0	0	0	0	0	43	16	57	1	8	10	66	76	31	36	36	30	38	34	31	22	6	12	49	0	0	0	0	0	0	0
295	47	1	4	1	2	4	2	3	2	0	0	1	0	0	0	0	0	0	0	0	0	0	1	40	10	49	9	11	11	49	45	27	35	30	26	35	23	18	19	22	5	44	0	0	0	0	0	0	0
296	51	2	1	3	3	4	4	2	3	0	0	0	0	0	0	0	0	0	0	0	0	0	0	32	12	47	6	6	9	54	55	24	20	31	23	33	25	23	14	21	5	19	0	0	0	0	0	0	0
297	56	2	1	3	3	4	4	4	4	0	0	0	0	0	0	0	0	0	0	0	0	0	0	35	14	53	3	6	7	68	68	30	32	31	27	41	33	34	18	4	4	24
298	58	2	2	1	3	4	3	3	2	0	0	1	0	1	0	0	0	0	0	0	0	1	1	29	11	53	1	15	8	56	58	20	16	31	19	40	31	24	12	13	12	31	0	0	0	0	0	0	0
299	46	1	1	3	3	4	3	4	2	0	0	0	0	0	0	0	0	0	0	0	0	0	0	42	15	59	4	5	8	61	76	28	20	37	27	31	32	24	15	8	6	36
300	47	2	1	3	3	4	3	3	3	0	0	0	0	0	0	0	0	0	0	0	0	0	0	32	9	45	2	11	6	48	48	17	17	26	20	32	21	23	13	21	7	14	0	0	0	0	0	0	0
301	48	1	1	3	3	4	4	2	4	0	0	0	0	1	0	0	0	0	0	0	0	0	1	40	12	46	8	11	13	71	65	33	33	37	29	38	32	33	22	12	9	39	0	0	0	0	0	0	0
302	48	2	1	3	3	4	4	4	3	0	0	0	0	0	0	0	0	0	0	0	0	0	0				0	14	9	49	53	22	17	29	24	25	19	21	14	9	10	30
303	46	2	4	5	2	4	4	4	2	0	0	0	0	0	0	0	0	0	0	0	0	0	0	39	14	43	6	11	9	68	73	24	36	41	34	37	29	19	15	20	4	39	0	0	0	0	0	0	0
304	47	2	1	1	3	4	3	3	2	0	0	0	0	0	0	0	0	0	0	0	0	0	0	46	13	52	14	6	8	53	65	26	35	34	23	23	22	22	19	10	3	49
305	54	2	1	3	3	3	3	4	4	0	0	0	0	0	0	0	0	0	0	0	0	0	0	42	16	54	9	5	7	49	74	28	31	35	28	28	30	32	20	4	5	40
306	49	2	2	4	3	4	4	4	2	0	0	0	0	0	0	0	0	0	0	0	0	0	0	35	11	57	1	12	8	63	67	25	23	34	24	28	26	17	17	11	8	36
307	53	2	2	4	2	4	2	3	2	0	0	1	0	0	0	0	0	0	1	1	0	0	1	35	14	53	3	11	9	64	62	32	29	35	30	41	29	29	21	19	13	37	0	0	0	0	0	0	0
308	50	1	2	3	2	4	4	4	4	0	0	0	0	0	0	0	0	0	0	0	0	0	0	40	6	24	3	19	5									26
309	56	1	1	3	3	4	3	3	3	0	0	0	0	0	0	0	0	0	0	0	0	0	0	39	13	33	8	8	7	55	54	27	24	17	22	37	28	24	16	2	8	47
310	59	1	2	4	3	4	4	3	3	0	0	0	0	0	0	0	0	0	0	0	0	0	0	44	13	60	7	5	8	54	51	27	21	27	21	34	19	25	24	9	5	22	0	0	0	0	0	0	0
311	56	1	1	3	2	4	1	1	3	0	0	0	0	0	0	0	0	0	0	0	0	0	0	35	13	38	6	6	7	65	70	28	18	29	28	30	34	29	12	10	5	22	0	0	0	0	0	0	0
312	62	1	1	5	3	4	4	2	3	0	0	1	0	0	0	0	0	0	0	0	0	0	1	38	16	57	8	8	8	67	70	31	27	35	29	32	31	26	20	7	7	42	0	0	0	0	0	0	0
313	54	2	1	2	3	4	3	2	3	0	0	0	0	1	0	0	0	0	0	0	0	0	1	31	12	45	4	12	9	59	60	30	29	37	26	30	30	24	21	8	6	34
314	44	2	1	1	3	4	2	4	2	0	0	0	0	0	0	0	0	0	0	0	0	0	0	36	14	57	10	7	10	66	71	34	30	43	28	40	35	28	22	9	5	51	0	0	0	0	0	0	0
315	63	2	1	2	3	4	3	4	3	0	0	0	0	0	0	0	0	0	0	0	0	0	0	49	16	53	8	5	13	72	72	31	32	22	28	39	35	30	25	0	3	39	0	0	0	0	0	0	0
316	50	2	1	3	3	4	4	2	3	0	0	0	0	0	0	0	0	0	0	0	0	0	0	44	16	52			10	60	74	32	26	35	27	32	30	29	18	5	3	39	0	0	0	0	0	0	0
317	59	2	1	3	2	3	2	3	2	0	0	0	0	1	0	0	0	0	0	0	0	0	1	23	13	43	6	9	10	47	55	21	26	39	22	37	23	21	11	9	9	28
318	55	1	1	3	2	4	2	2	3	0	0	0	0	0	0	0	0	0	0	0	0	0	0	33	15	35	3	8	10	46	54	19	24	28	22	27	19	22	9	18	7	27	0	0	0	0	0	0	0
319	56	2	4	2	3	4	4	3	3	0	0	0	0	1	0	0	0	0	0	1	0	0	1	34	13	46	3	9	11	44	57	21	36	30	22	34	16	21	19	23	8	50	0	0	0	0	0	0	0
320	53	2	4	5	3	4	3	4	3	0	0	0	0	0	0	0	0	0	0	0	0	0	0	41	12	28	10	8	9	56	62	24	14	25	27	29	21	24	14	14	9	18
321	43	2	1	3	3	3	3	4	4	0	0	1	0	0	0	0	0	0	0	0	0	0	1	42	14	54	1	6	5	66	73	24	31	37	21	41	32	32	19	10	10	30	0	0	0	0	0	0	0
322	53	2	1	2	3	4	3	4	3	0	0	0	0	0	0	0	0	0	0	0	0	0	0	38	15	52	2	7	7	68	59	32	27	30	27	42	32	29	19	10	5	38
323	58	2	1	2	2	4	2	4	3	0	0	0	0	0	0	0	0	0	0	0	0	0	0	40	15	56	14	7	11	59	74	34	36	42	29	41	34	28	16	4	7	48	0	0	0	0	0	0	0
324	64	2	1	2	2	4	2	3	3	0	0	1	0	0	0	0	0	0	0	1	0	0	1	39	14	57	7	13	5	72	67	26	27	43	25	36	33	25	14	3	7	38
325	52	1	2	4	3	4	3	4	3	1	1	0	0	0	0	0	0	0	0	0	0	0	1	38	10	42	10	10	12	47	53	21	23	32	23	34	20	15	18	10	5	30	0	0	0	0	0	0	0
326	44	1	1	3	3	4	4	3	3	0	0	0	0	0	0	0	0	0	0	0	0	0	0	37	16	60	8	5	9	62	83	35	30	37	31	36	36	32
327	63	1	1	2	3	4	4	3	4	0	0	1	0	0	0	0	0	0	1	0	0	1	1	40	14	50	4	8	6	61	44	30	26	40	26	33	29	26	15	10	5	45	0	0	0	0	0	0	0
328	59	1	1	3	3	4	3	3	3	0	0	0	0	0	0	0	0	0	0	0	0	0	0	36	13	44	8	11	6	51	54	20	20	27	20	31	24	24	19	16	6	27	0	0	0	0	0	0	0
329	58	2	1	3	2	1		2	3	1	0	1	0	0	0	0	0	0	0	0	0	0	1	45	16	59	5	5	13	75	67	33	28	34	27	40	34	29	20	2	2	35	0	0	0	0	0	0	0
330	58	1	1	2	3	4	3	4	3	0	0	1	0	0	0	0	0	0	0	0	0	0	1	31	12	47	2	12	7	53	49	23	13	30	21	26	16	21	14	20	8	17	0	0	0	0	0	0	0
331	54	2	4	5	3	4	3	4	3	0	0	0	0	0	0	0	0	0	0	0	0	0	0	36	15	55	4	5	7	56	80	31	36	44	30	42	30	22	22	7	4	29	0	0	0	0	0	0	0
332	45	2	2	4	2	4	2	2	2	0	0	0	0	0	0	0	0	0	0	0	0	0	0	39	14	51	3	10	8	46	57	27	32	38	26	30	19	26	16	16	8	40	0	0	0	0	0	0	0
333	45	2	2	4	3	4	4	3	2	0	0	0	0	0	0	0	0	0	0	0	0	0	0	48	16	57	6	4	8	80	80	35	36	39	31	41	35	30	23	0	2	56	0	0	0	0	0	0	0
334	50	2	1	3	3	4	2	3	4	0	0	0	0	0	1	0	0	0	0	0	0	0	1	41	13	54	6	6	6									21
335	55	2	4	4	3	4	2	4	1	1	0	1	0	0	0	0	0	0	0	0	0	0	1	33	12	56	5	12	10	35	67	34	34	42	23	34	35	27	17	9	10	41
336	63	2	2	1	3	4	3	4	2	0	0	1	0	0	0	0	0	0	0	0	0	1	1	37	14	48	6	6	12	62	68	30	21	35	26	37	29	26	17	10	6	41	0	0	0	0	0	0	0
337	45	2	4	1	3	4	2	3	1	0	0	0	0	0	0	0	0	0	0	0	0	0	0	33	14	60	3	5	10	56	56	29	33	38	20	38	30	27	22	7	2	42
338	54	2	1	3	3	1		3	3	0	0	1	0	0	0	0	0	0	0	0	0	0	1	44	15	59	8	5	10	71	82	33	31	43	31	36	35	28	19	1	3	34	0	0	0	0	0	0	0
339	44	2	2	3	3	4	4	2	3	0	0	0	0	0	0	0	0	0	0	0	0	0	0	47	12	44	13	6	10	68	61	24	19	34	27	31	31	29	15	16	5	26	0	0	0	0	0	0	0
340	53	1	1	3	3	4	4	4	3	0	0	0	0	0	0	0	0	0	0	0	0	0	0	43	15	55	8	12	4	59	67	27	28	38	29	29	21	22	20	7	10	39	0	0	0	0	0	0	0
341	51	2	4	6	3	4	3	4	2	0	0	0	0	0	0	0	0	0	0	0	0	0	0	39	14	50	3	9	8	52	56	22	18	27	25	31	18	21	11	14	8	26	0	0	0	0	0	0	0
342	61	1	2	1	3	4	2	2	2	1	0	0	0	0	0	0	0	0	0	0	0	0	1	37	11	50	6	11	10	63	50	30	17	32	29	32	31	23	18	14	6	19
343	46	2	1	3	3	4	3	4	4	0	0	0	0	0	0	0	0	0	0	0	0	0	0	43	12	54	5	8	9	65	54	29	23	20	24	30	31	24	20	15	4	50
344	45	1	1	2	3	4	4	2	3	1	0	0	0	0	0	0	0	0	0	0	0	0	1	40	15	23	6	6	6	51	60	22	18	27	23	32	22	24	16	16	4	25	0	0	0	0	0	0	0
345	58	1	2	5	3	1		4	2	0	0	0	1	0	0	0	0	0	0	0	0	0	1	41	16	54	8	4	13	80	76	28	24	38	31	40	30	28	22	0	2	43	0	0	0	0	0	0	0
346	52	1	1	3	3	4	3	3	3	0	0	1	0	0	0	0	1	0	0	0	0	0	1	32	13	54	1	8	6									28
347	61	1	1	3	3	2		3	3	1	1	0	0	1	0	0	0	0	0	0	1	1	1	28	8	25	8	20	6	44								17
348	50	2	1	2	3	4	4	3	4	0	0	0	0	0	0	0	0	0	0	0	0	0	0	41	12	45	12	6	12	67	63	33	33	32	29	34	33	18	19	8	6	37	0	0	0	0	0	0	0
349	50	2	1	3	3	4	2	3	3	0	0	0	0	0	0	0	0	0	0	0	0	0	0	46	14	58	8	5	7	63	76	31	23	28	29	29	26	22	19	8	4	33	0	0	0	0	0	0	0
350	42	1	1	2	3	4	4	3	3	0	0	0	0	0	0	0	0	0	0	0	0	0	0	43	16	58	7	8	6	75	73	33	26	25	26	37	34	34	19	9	5	29
351	48	2	4	1	3	4	3	3	2	0	0	0	0	0	0	0	0	0	0	0	0	0	0	41	14	48	9	4	8	58	61	22	24	32	27	40	27	18	13	15	3	35	0	0	0	0	0	0	0
352	55	1	1	3	3	4	3	4	4	0	0	0	0	0	0	0	0	0	0	0	0	0	0	42	16	57	9	5	11	61	71	33	27	36	27	34	29	26	20	5	4	21
353	51	1	2	1	3	4	3	2	2	0	0	0	0	0	0	0	0	0	0	0	0	0	0	37	12	52	4	6	4	47	52	17	19	33	22	27	14	21	15	11	9	23	0	0	0	0	0	0	0
354	59	1	1	3	3	4	3	3	3	0	0	0	0	0	0	0	0	0	0	0	0	0	0	43	16	58	7	8	12	79	85	36	35	30	31	40	36	31	22	3	7	52	0	0	0	0	0	0	0
355	46	1	4	1	3	4	3	3	2	0	0	0	0	0	0	0	0	0	0	0	0	0	0	36	15	57	5	5	7	57	56	26	10	27	23	27	26	21	14	11	5	19	0	0	0	0	0	0	0
356	54	2	1	3	3	4	4	4	3	0	0	1	0	1	0	0	0	0	0	1	0	0	1	39	16	51	9	4	11	58	66	30	28	41	30	35	34	21			4	41
357	45	2	1	3	3	4	3	2	4	0	0	0	0	0	0	0	0	0	0	0	0	0	0	36	14	54	5	12	11	62	75	30	23	36	29	27	30	23	16	13	7	36
358	57	2	1	2	3	3	3	3	4	0	0	0	0	0	0	0	1	0	0	0	0	0	1	49	12	51	8	14	8	69	73	32	34	39	31	33	32	23	17	14	10	49	0	0	0	0	0	0	0
359	49	2	1	3	3	4	3	1	3	0	0	0	0	0	0	0	0	0	0	0	0	0	0	47	16	58	8	4	7	72	82	36	31	44	31	41	33	28	17	0	2	44	0	0	0	0	0	0	0
360	48	1	4	4	3	4	4	3	2	0	0	1	0	0	0	0	0	0	0	0	0	0	1	24	12	47	2	10	8	50	60	11	12	30	29	41	26	35	16	16	12	36	0	0	0	0	0	0	0
361	52	2	1	3	3	4	4	2	3	0	0	1	0	0	0	0	0	0	0	0	0	0	1	32	13	52	4	7	4	74	73	32	21	37	30	35	33	30	21	2	3	48	0	0	0	0	0	0	0
362	60	1	1	3	2	4	2	4	3	0	0	0	0	0	0	0	0	0	0	1	0	0	1	28	13	45	6	10	11	56	74	29	27	34	28	39	32	30	8	1	4	19	0	0	0	0	0	0	0
363	50	1	1	2	3	4	3	3	4	0	0	0	0	0	0	0	0	0	0	0	0	0	0	49	16	49	4	6	3	60	74	34	27	34	29	37	33	23	17	11	3	41	0	0	0	0	0	0	0
364	42	1	1	3	3	4	2	4	2	0	0	0	0	0	0	0	0	0	0	0	0	0	0	48	15	55	7	7	8	65	75	34	31	38	30	38	36	28	21	2	4	45
365	58	2	2	4	3	4	2	3	2	0	0	0	0	0	0	0	0	0	0	0	0	0	0	37	16	51	5	9	5	57	75	33	27	39	30	38	33	24	22	0	2	38	0	0	0	0	0	0	0
366	53	2	1	3	3	4	3	3	3	1	0	0	0	0	0	0	0	0	0	0	0	0	1	33	12	57	6	9	8	59	57	25	21	37	28	42	31	23	20	19	7	21
367	57	2	1	3	3	4	3	3	3	1	0	0	0	0	0	0	0	0	0	1	0	0	1	39	12	45	3	11	6	70	85	26	36	36	17	37	34	29	18	10	5	45	0	0	0	0	0	0	0
368	53	2	1	2	2	4	3	4	2	0	0	0	0	0	0	0	0	0	0	0	0	0	0	43	16	42	5	8	9	65	67	30	30	35	27	32	28	22	17	3	5	45
369	62	1	1	2	3	1		4	4	1	0	1	0	1	0	0	0	0	0	0	0	0	1	34	15	56	6	7	9	64	71	30	23	34	27	29	29	22	14	2	3	24	0	0	0	0	0	0	0
370	63	1	1	3	3	4	4	4	4	0	0	1	0	0	0	0	0	0	0	0	0	0	1	37	11	33	3	15										25
371	48	2	1	3	3	4	2	3	3	0	0	1	0	1	0	0	0	0	0	0	0	0	1	37	14	56	2	8										25
372	53	2	1	3	3	4	2	4	3	0	0	0	0	0	0	0	0	0	0	0	0	0	0	39	15	58	9	9										22
373	50	2	2	4	3	4	3	3	2	0	1	0	0	0	0	0	0	0	0	0	0	0	1	36	13	60	7	7										23
374	50	1	1	3	3	4	2	3	2	0	0	1	0	0	0	0	0	0	0	0	0	0	1	39	14	55	5	6										25
375	49	2	2	4	2	4	2	4	2	0	0	0	0	0	0	0	0	0	0	0	0	0	0	40	15	55	6	6										21
376	54	2	2	4	3	4	4	4	3	0	0	1	0	0	0	0	0	0	0	0	0	0	1	42	12	38	5	8										20
377	54	1	1	3	3	4	3	3	4	1	1	1	0	0	0	0	0	1	0	0	0	0	1	41	14	58	1	4										30
378	53	1	1	2	3	4	4	4	4	0	0	0	0	0	0	0	0	0	0	0	0	0	0	43	15	60	15	4										23
379	46	1	2	3	1	4	2	2	2	0	0	0	0	0	0	0	0	0	0	0	0	0	0	41	15	50	3	5										20
380	51	1	4	1	3	4	2	4	1	0	0	0	0	0	0	0	0	0	0	0	0	0	0	33	12	50	2	21										18
381	51	1	4	1	2	4	2	4	2	0	0	0	0	0	0	0	0	0	0	0	0	0	0	39	12	51	6	8										34
382	44	2	1	3	3	4	4	3	3	0	0	1	0	0	0	0	0	0	0	0	0	0	1	40	12	44	1	11										25
383	43	2	4	6	3	4	4	2	3	0	0	0	0	0	0	0	0	0	0	0	0	0	0	44	16	54	5	7										31
384	62	1	4	6	2	1		3	2	1	0	0	1	0	1	1	0	0	0	0	0	0	1	33	12	34	10	12										29
385	64	1	1	3	2	2		3	3	0	0	1	0	0	0	0	0	0	0	0	0	0	1	42	16	56	6	7										28
386	50	1	4	6	3	4	2	4	2	0	0	0	0	0	1	0	0	0	0	0	0	0	1	38	13	51	9	9										26
387	53	1	1	2	2	4	4	3	3	0	0	0	0	0	0	0	0	0	0	0	0	0	0	43	16	56	10	13										27
388	49	1	1	2	3	4	3	4	3	0	0	0	0	0	0	0	0	0	0	0	0	0	0	32	12	36	5	7										28
389	64	2	1	2	3	1		4	2	1	0	1	1	1	0	0	0	0	1	0	0	0	1	33	12	46	0	13										16
390	47	1	1	3	2	4	2	3	2	0	0	0	0	0	0	0	0	0	0	0	0	0	0	36	14	45	2	10										21
391	52	1	1	3	1	4	2	2	2	0	0	0	0	0	0	0	0	0	0	0	0	0	0	43	15	57	9	4										23
392	63	1	2	1	3	4	4	4	3	0	0	0	0	0	0	0	0	0	0	0	0	0	0	36	13	56	4	5										32
393	43	1	1	3	1	4	1	3	3	0	0	0	0	0	0	0	0	0	0	0	0	0	0	40	12	52	12	7										25
394	44	1	1	3	3	4	4	2	4	1	0	0	0	0	0	0	0	0	0	0	0	0	1	44	14	55	8	8										30
395	46	1	1	3	3	4	3	3	4	0	0	1	0	0	1	0	0	0	0	0	0	0	1	41	14	60	5	5										27			6	37
396	44	1	1	3	3	4	3	2	3	0	0	0	0	1	0	0	0	0	0	0	0	1	1	41	12	54	4	7										28
397	61	2	4	1	3	4	2	4	2	0	0	1	0	1	0	0	0	0	0	0	0	0	1	34	12	30	4	7										15
398	58	1	4	1	3	3	3	4	4	0	0	0	0	0	0	0	0	0	0	0	0	0	0	44	16	60	10	4										26					0	0	0	0	0	0	0
399	64	2	2	1	3	2		4	3	1	0	1	0	0	0	0	0	0	0	0	0	0	1	39	14	48	8	7										24
400	47	2	2	4	2	4	2	3	2	1	1	0	0	0	0	0	0	0	0	0	0	0	1	36	15	52	1	8	7									25
401	53	2	2	4	2	4	2	4	2	0	0	1	0	0	0	0	0	0	0	1	0	0	1	30	14	48	1	14	8	58	70	27	35	33	29	38	31	30	14	10	12	26
402	42	1	4	3	3	3	3	2	3	0	0	1	0	0	0	0	0	0	0	1	0	0	1	46	14	47	6	8	9	67	68	33	33	39	26	38	31	28	17	8	5	29
403	47	1	1	3	3	4	4	3	4	0	0	0	0	0	0	0	0	0	0	0	0	0	0	37	13	57	9	11	7	42	49	22	21	32	23	33	24	20	14	21	10	28	0	0	0	0	0	0	0
404	57	1	1	3	1	4	1	2	2	0	0	0	0	0	0	0	0	0	0	0	0	0	0	29	11	47	1	10	7									24
405	46	1	1	3	3	4	2	2	4	0	0	0	0	0	0	0	0	0	0	0	0	0	0	43	13	53	7	4	6	74	70	32	35	44	30	38	33	26	25	3	6	43	0	0	0	0	0	0	0
406	42	2	1	3	3	4	3	2	3	0	0	1	0	0	0	0	0	0	0	0	0	0	1	41	13	54	10	10	8	68	68	29	35	36	32	36	31	29	19	4	2	34
407	62	2	2	4	3	4	3	3	3	0	0	0	0	1	0	0	0	0	0	0	0	0	1	42	16	57	4	6	12	78	86	35	36	41	31	41	36	31	24	4	7	39	0	0	0	0	0	0	0
408	51	1	1	3	3	4	4	3	3	0	0	0	0	0	0	0	0	0	0	0	0	0	0	32	12	46	1	7	9									25
409	56	2	1	3	3	4	2	4	3	0	0	0	0	0	0	0	0	0	0	1	0	0	1	45	12	60	7	8	9	55	77	28	36	39	29	33	28	27	19	4	3	47	0	0	0	0	0	0	0
410	63	1	1	2	3	2		2	4	0	0	1	0	1	0	0	0	0	0	1	0	0	1	40	16	60	7	11	13	64	77	30	36	36	30	40	35	24	19	0	10	35	0	0	0	0	0	0	0
411	49	2	1	3	3	4	3	2	3	0	0	1	0	1	0	0	0	0	0	0	0	0	1	36	15	52	4	8	7	64	68	29	33	38	25	34	33	26	22	7	5	47	0	0	0	0	0	0	0
412	56	1	1	3	3	4	4	4	3	0	0	0	0	0	0	0	0	0	0	0	0	0	0	37	15	55	3	5	6	75	80	34	34	35	31	32	36	29	20	1	4	42
413	64	2	1	3	2	1		4	2	0	0	1	0	0	0	0	0	0	0	0	0	0	1	44	15	50	3	8	8	64	75	29	36	39	32	35	27	30	19	7	6	38	0	0	0	0	0	0	0
414	60	2	2	4	3	4	4	4	3	0	0	1	0	0	0	0	0	0	0	1	0	0	1	35	14	58	0	4	10	47	66	31	31	38	26	35	25	31	21	2	4	35
415	49	1	1	3	3	4	3	3	3	0	0	1	0	0	0	0	0	0	0	0	0	0	1	44	14	56	8	9	4	62	75	28	23	40	28	32	27	24	19	2	5	31
416	53	1	1	3	3	4	4	3	3	0	0	0	0	0	0	0	0	0	0	0	0	0	0	38	13	54	2	7	9	50	64	28	29	32	23	31	27	20	16	4	4	40
417	49	1	2	5	3	1		4	3	0	0	0	0	0	0	0	0	0	0	0	0	0	0	31	7	31	14	13	12	30	38	12	32	24	13	21	15	15	16	45	10	34
418	47	2	1	3	2	4	2	2	3	0	1	0	0	1	0	0	0	0	0	0	0	1	1	31	14	27	5	24	8	54	57	24	28	24	22	32	24	22	9	14	12	31	0	0	0	0	0	0	0
419	45	1	1	3	3	4	4	3	3	0	0	1	0	0	0	0	0	0	0	0	0	0	1	37	11	34	2	19	10	58	50	25	30	19	27	36	29	26	23	35	12	41	0	0	0	0	0	0	0
420	44	2	1	3	3	4	3	3	3	1	0	1	0	0	0	0	0	0	0	0	0	0	1	40	15	57	6	19	10	75	59	33	30	40	24	41	33	30	24	28	8	40
421	48	1	1	3	2	4	2	2	3	0	0	0	0	0	0	0	0	0	0	0	0	1	1	37	15	57	3	5	5	56	78	32	29	36	23	34	30	24	15	16	5	26	0	0	0	0	0	0	0
422	55	2	2	4	3	4	4	3	3	0	0	0	0	0	0	0	0	0	0	0	0	0	0	40	16	59	3	6	10	59	61	27	25	35	24	32	28	22	17	10	6	34	0	0	0	0	0	0	0
423	51	1	1	3	3	4	3	3	3	0	0	0	0	0	1	0	0	0	0	0	1	0	1	46	16	60	8	6	8	67	82	33	27	36	29	30	28	27	22	3	5	47	0	0	0	0	0	0	0
424	60	1	1	2	2	2		2	4	0	1	1	0	0	0	0	0	0	1	0	0	0	1	45	16	51	8	7	10	74	68	29	31	29	28	28	33	31	17	10	4	23	0	0	0	0	0	0	0
425	53	1	1	3	3	4	2	2	3	0	0	1	0	0	0	0	0	0	0	0	0	0	1	42	16	49	8	7	10	59	85	33	34	37	30	40	35	26	18	0	3	32	0	0	0	0	0	0	0
426	54	1	1	2	2	4	4	3	3	0	0	1	0	0	0	0	0	0	0	0	0	0	1	44	15	54	10	5	7	62	69	28	26	34	28	30	30	25	18	5	6	34	0	0	0	0	0	0	0
427	65	1	1	2	3	1		3	3	0	0	0	0	0	0	0	0	0	0	0	0	1	1	45	16	59	9	7	8	65	78	28	33	40	24	40	34	32	23	1	3	54	0	0	0	0	0	0	0
428	52	1	1	3	2	4	2	2	2	1	0	1	0	0	0	0	0	0	0	0	0	0	1	32	12	54	4	10	8	43	56	25	21	32	22	31	28	24	14	7	7	27
429	42	1	4	2	3	4	3	4	3	0	0	0	0	0	0	0	0	0	0	0	0	0	0	43	15	60	9	4	8	67	81	33	36	39	31	40	33	29	14	0	3	38	0	0	0	0	0	0	0
430	62	2	1	2	2	1		4	4	0	0	0	0	0	0	0	0	0	0	0	0	0	0	41	14	51	2	11	9	64	70	30	20	38	28	36	31	25	13	7	6	28	0	0	0	0	0	0	0
431	64	2	2	1	3	2		4	2	1	0	0	0	0	0	0	0	0	0	0	0	0	1	41	12	43	4	5	6	57	53	18	11	36	23	28	21	16	10	24	5	27	0	0	0	0	0	0	0
432	51	2	1	3	3	4	4	2	3	0	0	0	0	0	0	0	0	0	0	0	0	0	0	41	14	44	1	4	4	54	61	27	31	39	20	37	33	23	17	17	8	35	0	0	0	0	0	0	0
433	55	2	1	3	2	1		2	2	0	0	0	0	0	0	0	0	0	0	1	0	0	1	39	16	56	4	5	11	61	77	32	34	28	28	38	31	28	15	14	9	32	0	0	0	0	0	0	0
434	58	2	1	3	3	4	2	4	3	0	0	0	0	1	0	0	0	0	0	0	0	0	1	32	12	42	5	6	8	54	66	23	26	33	25	36	27	28	20	5	6	42	0	0	0	0	0	0	0
435	57	2	1	2	3	4	4	3	3	0	0	1	0	0	1	0	0	0	0	0	0	0	1	37	15	51	5	7	10	59	57	26	13	25	28	31	29	23	16	6	6	19	0	0	0	0	0	0	0
436	63	2	3	4	3	2		1	3	0	0	0	0	0	0	0	0	0	0	0	0	0	0	38	14	58	3	10	11	55	66	26	21	39	27	41	27	24	16	4	5	25	0	0	0	0	0	0	0
437	62	1	1	3	3	4	4	4	3	1	0	0	0	0	0	0	0	0	0	0	0	0	1	40	14	49	9	8	10	62	71	28	29	26	26	38	31	30	22	2	12	31
438	56	2	3	4	3	4	3	1	3	0	0	0	0	0	0	0	0	0	0	0	0	0	0	43	15	54	5	4	8	56	68	31	29	34	30	38	29	22	20	3	4	40
439	58	2	1	3	3	4	2	1	3	0	0	0	0	0	0	0	0	0	0	0	0	0	0	36	12	38	7	12	8	67	69	26	33	35	26	40	30	29	23	20	9	33
440	46	2	4	3	1	4	4	3	3	0	0	0	0	0	0	0	0	0	1	0	0	0	1	38	12	41	11	8	10	62	64	31	20	37	26	26	30	30	4	10	3	8
441	57	2	2	4	2	1		3	1	0	0	0	0	0	0	0	0	0	0	0	0	1	1	45	15	50	9	13	10	62	68	27	28	33	26	36	32	30	20	4	8	52	0	0	1	0	0	0	0
442	49	2	1	3	3	4	3	4	4	0	0	1	0	0	0	0	0	0	0	0	0	0	1	24	12	32	2	13	8	61	36	20	23	30	21	23	22	23	18	16	7	43	0	0	0	0	0	0	0
443	52	1	1	3	3	4	4	3	3	0	0	1	1	0	0	0	0	0	0	0	0	0	1	36	16	59	7	8	5	63	71	31	34	38	28	41	33	24	19	1	4	36	0	0	0	0	0	0	0
444	61	2	1	3	1	2		4	3	0	0	1	0	0	0	0	0	0	0	0	0	1	1	42	10	22	13	11	13	44	26	19	12	21	19	22	20	18	7	29	8	31
445	54	2	1	3	2	2		2	3	0	0	1	0	1	0	0	0	0	0	1	0	0	1	32	12	41	4	8	8	58	52	28	35	19	26	34	28	25	13	10	7	35	0	0	0	0	0	0	0
446	58	1	2	4	3	4	4	2	3	1	1	0	0	1	0	0	0	0	1	0	0	0	1	36	13	56	12	13	10	55	59	24	26	37	23	37	22	17	15	11	7	46	0	0	0	0	0	0	0
447	47	2	1	3	3	4	3	1	4	0	0	0	0	0	0	0	0	0	0	0	0	0	0	32	9	52	5	11	8	62	56	24	24	33	23	37	27	25	16	36	8	31	0	0	0	0	0	0	0
448	58	2	1	2	3	4	3	3	3	0	0	0	0	0	0	0	0	0	0	0	0	0	0	35	12	47	1	9	6	60	50	27	20	32	23	35	30	25	17	10	5	29	0	0	0	0	0	0	0
449	45	1	4	3	3	4	3	4	3	0	0	0	0	0	1	0	0	0	0	0	0	0	1	37	16	59	6	5	10	58	69	25	26	36	32	22	26	26	18	4	4	32
450	45	2	1	6	3	4	2	3	3	0	0	1	0	0	0	0	0	0	0	0	0	0	1	36	15	60	1	11	6	75	84	36	36	36	31	36	36	35	25	8	3	42	0	0	0	0	0	0	0
451	56	2	4	6	2	4	2	4	2	0	0	1	0	1	0	0	0	0	0	0	0	0	1	26	15	29	3	7	9	38	47	19	29	34	26	32	13	19	18	12	6	37	0	0	0	0	0	0	0
452	43	1	1	3	3	4	4	4	4	0	0	0	0	0	0	0	0	0	0	0	0	0	0	37	14	43	6	4	6	72	53	28	24	27	27	37	34	26	17	11	8	35
453	51	2	1	3	3	1		2	3	0	0	0	0	0	0	0	0	0	0	0	0	0	0	43	12	56	5	4	7	53	51	20	34	29	27	42	28	22	23	0	6	37
454	59	1	1	3	1	4	1	3	2	0	0	1	0	0	0	0	0	0	1	0	0	0	1	26	11	53	0	7	6	43	44	8	7	17	17	15	9	16	10	26	5	1	0	0	0	0	0	0	0
455	53	2	4	1	3	4	3	4	2	0	0	0	0	0	0	0	0	0	0	0	0	0	0	45	8	43	7	11	11	61	57	28	36	30	27	38	30	32	20	31	8	43
456	65	2	3	1	2	2		2	2	0	0	1	0	0	0	0	0	0	0	0	0	0	1	48	16	48	6	5	9	64	69	28	33	27	26	35	34	25	14	0	7	40	0	0	0	0	0	0	0
457	46	2	1	3	3	4	3	3	3	0	0	0	0	0	0	0	0	0	0	0	0	0	0	34	11	41	3	15	11	65	59	32	35	40	30	35	33	28	20	11	10	41
458	51	2	4	3	2	4	3	2	3	0	0	0	0	0	0	0	0	0	0	0	0	0	0	34	16	57	5	5	7	60	69	26	34	37	28	35	27	26	15	17	3	26	0	0	0	0	0	0	0
459	61	1	1	3	3	1		4	3	0	0	1	0	0	0	0	0	0	1	0	0	0	1	37	16	56	6	7	6	61	77	31	31	35	22	33	30	28	20	7	4	39
460	60	2	1	2	3	4	2	4	4	0	0	1	0	0	0	0	0	0	0	0	0	0	1	42	13	60	4	4	11	64	71	30	35	42	31	41	34	26	23	9	1	40
461	57	2	1	3	2	3	1	3	4	0	0	1	0	0	0	0	0	0	0	1	0	0	1	47	14	51	12	6	10	69	88	22	36	40	29	35	33	26	17	0	6	35	0	0	0	0	0	0	0
462	53	1	2	1	2	4	2	3	3	0	0	0	0	0	0	0	0	0	0	0	0	0	0	36	14	52	8	5	5	61	57	26	29	28	25	34	29	27	15	12	5	25	0	0	0	0	0	0	0
463	57	2	4	1	3	2		4	3	0	0	0	0	0	0	0	0	0	1	0	0	0	1				3	14	11	60	63	28	27	34	26	37	31	25	17	13	11	38	0	0	0	0	0	0	0
464	45	2	1	3	3	4	4	4	3	0	0	0	0	0	0	0	0	0	0	0	0	0	0	36	11	42	6	11	12	60	71	26	29	26	27	35	32	20	17	5	4	37	0	0	0	0	0	0	0
465	62	2	4	1	3	4	3	4	3	0	0	0	0	0	0	0	0	0	0	0	0	0	0	34	14	47	4	11	10	64	68	24	25	37	26	36	27	24	18	4	6	32	0	0	0	0	0	0	0
466	56	2	1	3	3	4	4	2	3	0	0	0	0	0	0	0	0	0	0	0	0	0	0	36	13	49	9	9	11	52	71	25	34	41	27	39	34	28			12	42
467	53	1	1	3	2	1		3	2	0	0	0	0	0	0	0	0	0	0	0	0	0	0	39	14	59	9	6	9									34
468	49	2	4	5	3	4	4	4	3	0	0	0	0	0	0	0	0	0	0	0	0	0	0	41	16	53	7	7	10	70	80	33	35	39	30	40	31	26	24	2	5	33	0	0	0	0	0	0	0
469	47	1	1	3	2	4	2	1	2	0	0	0	0	0	0	0	0	0	0	0	0	0	0	36	15	54	6	6	2	67	57	28	18	38	26	30	27	26	11	6	4	13	0	0	0	0	0	0	0
470	65	2	2	1	2	4	2	3	3	0	0	1	0	1	0	0	0	0	0	0	0	0	1	31	13	34	7	12	11	56	40	23	34	34	27	42	22	25	21	13	13	40	0	0	0	0	0	0	0
471	49	2	1	3	3	4	4	3	3	0	0	0	0	0	0	0	0	0	0	0	0	0	0	30	13	48	8	8	10	48	50	25	33	29	23	39	25	27	19	29	6	45
472	54	2	1	3	3	4	4	3	4	0	0	1	0	0	0	0	0	0	0	0	0	0	1	43	15	60	5	4	10	57	69	24	28	42	28	34	28	23	19	2	3	39	0	0	0	0	0	0	0
473	48	2	1	3	3	4	3	3	4	0	0	0	0	0	0	0	0	0	0	0	0	0	0	43	16	50	5	6	10	72	76	33	35	31	30	39	32	33	23	1	3	54
474	45	2	1	3	3	4	3	4	4	0	0	0	0	0	0	0	0	0	0	0	0	0	0	46	16	60	8	5	7	77	82	34	30	32	29	33	35	28	16	8	3	38	0	0	0	0	0	0	0
475	45	2	1	3	3	4	3	2	3	0	0	0	0	0	0	0	0	0	0	0	0	0	0	43	15	53	6	8	10	67	73	35	36	39	29	41	30	25	21	2	4	33	0	0	0	0	0	0	0
476	53	2	1	3	2	4	1	4	2	0	0	0	0	0	0	0	0	0	0	1	0	0	1	38	12	36	0	7	9	77	71	33	27	39	29	40	36	31	12	14	7	37	0	0	0	0	0	0	0
477	54	2	1	3	3	4	3	3	3	0	0	0	0	0	1	0	0	0	0	0	0	0	1	41	16	60	7	5	11	66	67	31	20	42	29	39	35	28	16	2	3	43
478	66	1	1	3	3	2		4	3	0	0	1	0	0	0	0	0	0	0	0	0	0	1	49	15	56	9	5	11	80	75	35	29	37	31	40	36	28	14	0	2	35	0	0	0	0	0	0	0
479	64	1	1	2	3	2		3	3	0	0	1	1	0	0	0	0	0	0	0	0	0	1	46	16	60	8	5	13	77	86	33	36	40	31	42	36	27	19	0	1	48	0	0	0	0	0	0	0
480	57	2	2	6	3	4	4	4	3	0	0	0	0	0	1	0	0	0	0	0	0	0	1	47	16	56	8	7	9	64	87	34	34	37	31	42	32	32	22	1	3	45
481	61	2	1	3	2	3	2	4	2	1	0	0	0	0	0	0	0	0	0	0	0	0	1	37	15	51	2	6	10	64	78	27	29	33	30	32	33	26	15	5	1	37
482	59	2	4	4	3	1		4	3	0	0	1	0	0	0	0	0	0	0	0	0	0	1	38	15	56	8	12	8	59	77	35	31	42	31	42	36	29	21	0	9	44	0	0	0	0	0	0	0
483	50	1	1	3	2	1		3	3	0	0	0	0	0	0	0	0	0	0	0	0	0	0	39	14	40	10	6	10	55	57	23	25	33	22	37	26	30	16	22	4	31
484	56	1	4	1	2	4	2	4	1	0	0	0	0	0	0	0	0	0	0	0	0	0	0	45	15	55	10	15	6	73	74	33	36	38	32	41	33	27	20	5	8	37	0	0	0	0	0	0	0
485	66	2	2	1	2	3	2	4	2	1	0	1	1	1	0	0	0	0	0	1	0	1	1	34	12	47	4	11	9									24
486	50	2	1	3	2	4	2	1	3	0	0	0	0	0	0	0	0	0	0	0	0	0	0	38	14	31	8	7	10	63	71	27	24	31	26	34	30	24	15	2	6	34
487	56	2	3	4	2	4	2	3	2	0	0	0	0	0	0	0	0	0	0	0	0	0	0	28	10	44	7	11	12	54	51	26	27	35	30	39	32	28	20	32	13	34	0	0	0	0	0	0	0
488	48	1	1	3	3	4	3	3	3	0	0	0	0	0	0	0	0	0	0	0	0	0	0	30	6	34	13	4	7	60	75	28	19	26	26	36	30	34	15	20	2	5	0	0	0	0	0	0	0
489	53	2	4	3	3	4	2	4	3	0	0	0	0	0	0	0	0	0	0	0	0	1	1	34	12	54	4	12	6	49	51	23	31	32	28	26	20	23	13	11	7	36
490	61	1	1	2	2	4	4	1	3	0	0	0	0	0	0	0	0	0	0	0	0	0	0	36	15	46	6	8	7	63	78	31	22	29	27	33	30	28	11	10	5	25	0	0	0	0	0	0	0
491	60	2	3	4	3	4	3	3	3	0	0	0	0	0	0	0	0	0	0	0	0	0	0	43	15	59	10	6	11	74	87	35	27	35	31	35	36	27	21	7	3	49	0	0	0	0	0	0	0
492	48	1	1	2	2	4	2	3	3	0	0	0	0	0	0	0	0	0	0	0	0	0	0	44	15	53	16	5	8	59	50	21	11	43	23	30	25	25	17	8	4	24	0	0	0	0	0	0	0
493	60	2	1	3	2	4	2	3	3	0	0	1	0	0	0	0	0	0	0	0	0	0	1	43	16	52	0	5	8	67	70	34	28	34	31	36	35	21	17	6	4	40	0	0	0	0	0	0	0
494	45	2	1	3	2	4	2	3	3	0	0	0	0	0	0	0	0	0	0	0	0	0	0	33	13	33	0	14	6	46	50	24	28	32	23	30	23	21	16	6	9	32	0	0	0	0	0	0	0
495	66	2	3	1	1	2		2	2	0	0	1	0	0	0	0	0	0	0	0	0	0	1	45	14	31	2	10	9	76	50	23	36	36	28	39	33	23	19	4	1	58	0	0	0	0	0	0	0
496	51	2	1	3	3	4	4	3	4	0	0	0	0	1	0	0	0	0	0	0	0	0	1	33	14	49	5	5	10	53	68	29	21	31	25	40	32	30	20	6	3	25	0	0	0	0	0	0	0
497	55	2	4	3	3	4	3	1	3	0	0	1	0	0	1	0	0	0	0	1	0	0	1	32	14	45	6	9	8	52	55	25	20	33	24	26	21	19	17	9	3	25	0	0	0	0	0	0	0
498	55	1	1	3	3	4	4	4	3	1	0	0	0	0	0	0	0	0	0	0	0	0	1	38	13	58	1	17	7	29	57	15	26	35	26	21	17	14	19	11	6	35
499	54	2	4	6	3	4	4	3	2	0	0	0	0	0	0	0	0	0	0	0	0	0	0	36	8	46	4	15	9	76	74	32	36	37	28	40	35	24	21	14	8	50	0	0	0	0	0	0	0
500	56	2	4	1	3	4	3	4	3	0	0	0	0	0	0	0	0	0	0	0	0	0	0	37	15	55	7	5	10	53	49	20	12	29	22	28	24	18	14	12	3	21	0	0	0	0	0	0	0
501	59	2	1	3	2	4	2	3	3	0	0	0	0	0	0	0	0	0	0	0	0	0	0	39	13	48	6	6	8	66	71	32	36	33	30	42	35	31	17	6	8	37	0	0	0	0	0	0	0
502	47	1	1	3	2	4	2	3	3	0	0	1	0	0	0	0	0	0	0	0	0	0	1	22	10	48	1	15	7	44	65	13	22	31	19	30	18	18	16	15	8	20	0	0	0	0	0	0	0
503	46	2	1	2	3	4	4	2	4	0	0	0	0	1	0	0	0	0	0	0	0	0	1	38	14	51	11	17	8	53	70	29	31	40	29	39	32	27	19	3	7	27	0	0	0	0	0	0	0
504	53	1	1	6	2	4	1	2	3	1	0	0	0	0	0	0	0	0	0	0	0	0	1	40	15	58	5	6	8	37	57	21	16	36	23	21	17	23	15	10	4	24
505	47	1	4	3	2	4	2	3	3	1	0	0	0	0	0	0	0	0	0	0	0	0	1	35	13	39	7	7	6	57	59	32	25	34	28	42	32	28	11	3	4	27	0	0	0	0	0	0	0
506	58	1	1	3	3	4	4	1	3	0	0	0	0	0	0	0	0	0	0	0	0	0	0	30	16	53	7	8	5	55	50	16	20	26	24	28	23	21	13	17	8	33
507	46	1	1	6	3	4	2	4	2	0	0	0	0	0	0	0	0	0	0	0	0	0	0	43	14	32	9	12	10	51	56	21	33	28	27	36	25	23	18	8	5	49	0	0	0	0	0	0	0
508	55	1	1	3	3	4	4	3	4	0	0	1	0	0	0	0	0	0	0	0	0	0	1	44	16	49	6	6	7	65	76	34	31	38	28	39	34	27	16	0	3	30
509	51	1	1	3	3	4	4	3	3	0	0	1	0	0	1	0	0	0	0	0	0	0	1	30	11	57	0	5	7	50	67	25	21	32	25	31	23	24	11	0	3	12
510	50	1	1	3	3	4	3	4	3	0	0	1	0	0	0	0	0	0	0	0	0	0	1	45	15	60	6	4	9	62	60	31	31	32	29	34	28	28	19	5	5	32
511	47	1	1	3	3	4	4	3	3	0	0	0	0	0	0	0	0	0	0	0	0	0	0	45	14	55	0	9	9	62	77	34	30	34	27	30	30	26	19	11	6	28	0	0	0	0	0	0	0
512	54	1	4	3	2	4	2	2	3	0	0	1	1	0	0	0	0	0	0	0	0	0	1	33	12	54	3	4	5	44	39	12	14	25	20	29	17	15	12	25	6	9
513	56	1	1	3	3	4	3	4	3	0	0	0	0	0	0	0	0	0	0	0	0	0	0	43	16	53	7	7	10	74	83	36	33	33	30	42	33	31	18	6	5	40
514	44	2	1	3	3	4	4	2	3	0	0	0	0	0	0	0	0	0	0	0	0	0	0	27	10	41	2	14	7	49	41	19	16	23	21	28	21	27	14	24	9	18	0	0	0	0	0	0	0
515	57	1	2	4	3	4	4	4	4	0	0	0	0	0	0	0	0	0	0	0	0	0	0	38	13	50	6	7	12	72	84	34	30	27	32	39	36	29	17	7	6	41
516	42	2	1	6	2	4	2	4	2	0	0	0	0	0	0	0	0	0	0	0	0	0	0	24	13	41	4	16	7	60	47	27	20	35	21	31	27	21	17	12	5	27	0	0	0	0	0	0	0
517	54	2	1	3	3	4	2	4	4	0	0	0	0	0	0	0	0	0	0	0	0	0	0	28	14	38	7	10	7	53	64	22	32	33	22	31	21	25	15	9	5	47	0	0	0	0	0	0	0
518	54	2	2	4	3	4	3	3	3	0	0	1	0	1	0	0	0	0	0	0	0	0	1	38	16	58	3	11	6	76	83	31	22	37	29	37	31	21	19	2	1	43	0	0	0	0	0	0	0
519	64	2	1	2	3	3	3	4	3	0	0	0	0	0	0	0	0	0	0	0	0	0	0	44	15	51	10	5	8	71	74	34	27	28	28	39	33	26	23	6	7	39	0	0	0	0	0	0	0
520	49	1	4	1	3	4	4	3	3	0	0	0	0	0	0	0	0	0	0	0	0	0	0	40	16	60	8	6	8	60	72	26	28	34	27	28	29	28	16	22	5	44
521	46	1	1	3	2	4	2	2	3	0	0	0	0	0	0	0	0	0	0	0	0	0	0	41	10	59	3	4	12	64	68	28	24	25	24	33	30	28	13	2	2	43
522	56	2	1	3	2	4	2	3	3	0	0	1	0	0	0	0	0	0	0	0	0	0	1	28	13	24	4	8	8	51	52	27	36	32	27	37	27	20	15	18	8	30
523	62	1	1	3	3	2		2	3	1	1	1	1	0	0	0	0	1	0	0	0	0	1	31	16	37	4	6	4	56	61	24	26	33	25	25	21	22	13	6	8	28	0	0	0	0	0	0	0
524	56	2	2	4	2	2		4	2	0	0	0	0	0	0	0	0	0	0	0	0	1	1	29	12	29	6	9	5	51	51	25	21	24	23	30	24	23	14	17	5	25	0	0	0	0	0	0	0
525	48	2	4	5	3	4	3	4	3	0	0	1	0	0	0	0	0	0	0	0	0	0	1	37	14	51	5	11	7	63	66	30	35	27	30	36	32	22	15	11	4	35
526	58	2	1	3	3	1		4	3	1	0	1	0	0	0	0	0	0	0	0	0	0	1	34	14	49	7	6	7	49	57	20	24	35	24	27	21	16	15	13	1	39	0	0	0	0	0	0	0
527	61	2	3	4	3	4	1	4	2	0	0	1	0	1	0	0	0	0	0	1	0	0	1	42	16	38	6	5	10	78	67	29	30	28	29	39	30	23	11	0	2	35	0	0	0	0	0	0	0
528	44	1	1	3	2	4	4	1	3	0	0	0	0	0	0	0	0	0	0	0	0	0	0	49	16	55	6	11	5	79	79	29	27	38	30	39	35	31	21	11	6	49	0	0	0	0	0	0	0
529	53	2	1	3	3	4	4	2	3	0	0	0	0	0	0	0	0	0	0	0	0	0	0	32	16	40	6	4	4	64	79	32	29	37	26	29	35	31	19	2	2	42	0	0	0	0	0	0	0
530	57	2	1	3	2	4	4	2	3	0	0	0	0	0	0	0	0	0	0	0	0	0	0	36	16	56	6	8	7	44	63	26	16	35	21	23	20	20
531	59	2	2	4	2	4	3	4	2	0	0	0	0	0	0	0	0	0	0	0	0	0	0	44	15	46	5	7	7	54	61	26	33	40	24	34	25	24
532	45	2	1	3	2	4	2	2	3	0	0	0	0	0	0	0	0	0	0	0	0	0	0	28	14	38	2	6	8	62	62	22	28	21	25	31	19	26	14	17	5	39	0	0	0	0	0	0	0
533	55	1	1	6	1	4	2	2	2	0	0	0	0	0	0	0	0	0	0	0	0	0	0	44	16	55	5	5	5	68	71	30	26	42	26	40	31	30	17	4	4	50
534	45	2	4	3	2	4	2	4	2	0	1	1	0	1	0	0	0	0	0	0	0	0	1	38	11	27	1	8	10									23
535	60	1	1	2	3	1		3	3	0	0	0	0	0	0	0	0	0	0	0	0	0	0	43	15	57	11	5	12	64	87	30	24	34	27	30	34	32	21	7	4	38	0	0	0	0	0	0	0
536	45	2	1	3	3	4	3	1	3	0	1	0	0	0	0	0	0	0	0	0	0	0	1	33	13	42	6	11	4	59	60	33	29	40	30	31	27	24	18	4	3	30	0	0	0	0	0	0	0
537	58	2	1	2	3	4	2	4	3	0	0	0	0	0	0	0	0	0	0	0	0	0	0	39	16	46	5	6	9	58	66	25	29	30	23	34	30	29			12	47
538	44	1	1	3	3	4	4	4	3	0	0	1	0	0	0	0	0	0	0	0	0	0	1	33	14	44	7	11	9	58	62	28	34	27	24	39	30	27	17	7	4	31
539	63	2	1	2	3	2		2	3	1	0	0	0	0	0	0	0	0	0	0	0	0	1	45	15	56	2	4	7	72	87	36	30	32	30	31	35	18	21	11	2	46	0	0	0	0	0	0	0
540	48	2	1	2	3	4	4	4	3	0	0	1	0	1	0	0	0	0	0	0	0	0	1	43	16	52	10	10	9	64	83	34	33	40	30	42	36	29	20	0	7	42
541	50	1	4	2	3	4	3	4	3	0	0	1	0	0	0	0	0	0	0	0	0	0	1	42	15	54	9	16	13	61	66	24	26	32	29	40	29	29	20	5	5	45	0	0	0	0	0	0	0
542	45	1	4	1	3	4	4	4	2	0	0	0	0	0	1	0	0	0	0	0	0	0	1	35	12	48	7	5	9	65	65	32	30	36	26	33	30	31	17	9	5	39	0	0	0	0	0	0	0
543	53	1	1	2	3	4	4	2	3	1	0	0	0	0	0	0	0	0	0	0	0	0	1	46	14	56	7	8	9	75	71	29	22	38	29	35	32	30	17	4	4	15
544	54	1	1	3	3	4	4	4	4	0	0	1	0	0	0	0	0	0	0	0	0	0	1	50	16	58	6	4	7	63	77	32	36	39	29	42	35	24	22	0	1	39	0	0	0	0	0	0	0
545	65	1	1	2	3	4	3	4	3	0	0	1	0	0	0	0	0	0	0	0	0	0	1	48	16	53	6	7	9	72	86	31	27	38	30	41	36	27	19	2	6	31
546	49	2	4	1	2	1		2	2	1	0	0	0	1	0	0	0	0	0	0	0	0	1	37	14	56	1	10	8	72	85	35	23	43	31	42	36	32	16	3	6	40
547	46	1	1	3	2	4	2	1	2	0	1	0	0	0	0	0	0	0	0	0	0	0	1	41	13	37	6	5	6	74	85	33	32	40	31	41	36	28	15	0	2	32	0	0	0	0	0	0	0
548	61	2	1	2	3	1		2	2														0	39	14	56	7	11	12	58	67	31	12	36	29	31	32	15	14	9	8	17	0	0	0	0	0	0	0
549	47	2	1	3	3	4	3	2	2	0	0	0	0	0	0	0	0	0	0	0	0	0	0	35	16	50	3	8	9	72	79	34	32	40	30	39	36	32	20	11	6	20	0	0	0	0	0	0	0
550	43	1	2	1	3	4	3	3	3	0	0	0	0	0	0	0	0	0	0	0	0	0	0	39	12	45	8	10	7	46	47	17	20	25	24	24	23	16			5	36	0	0	0	0	0	0	0
551	54	2	1	6	3	4	2	3	3	0	0	0	0	1	0	0	0	0	0	1	0	0	1	41	15	56	6	11	7	60	74	32	36	32	29	37	31	24	22	7	7	55	0	0	0	0	0	0	0
552	45	2	4	3	3	4	2	1	3	0	0	0	0	0	0	0	0	0	0	0	0	0	0	41	15	58	4	5	6	73	79	36	35	38	26	27	35	26	21	5	2	53	0	0	0	0	0	0	0
553	58	1	1	2	3	1		4	1	0	0	0	0	0	0	0	0	0	0	0	0	0	0	48	16	59	3	5	7	76	67	26	33	35	24	38	32	33	20	8	3	34
554	44	1	2	1	3	4	4	3	3	0	0	0	0	0	0	0	0	0	0	0	0	0	0	41	13	54	8	9	12	60	67	28	32	37	24	41	24	22	21	7	6	39	0	0	0	0	0	0	0
555	56	2	1	3	3	4	4	2	3	0	0	0	0	0	0	0	0	0	0	0	0	0	0	35	16	58	4	6	9	62	64	28	30	36	31	40	29	32	18	2	1	39	0	0	0	0	0	0	0
556	51	1	2	3	3	4	4	3	4	0	0	0	0	0	0	0	0	0	0	0	0	0	0	41	15	55	4	6	6	76	81	36	31	33	31	41	35	32	20	4	4	43
557	46	2	1	3	3	3	2	3	3	0	0	0	0	0	0	0	0	0	0	0	0	0	0	36	12	40	4	12	7	59	61	24	35	27	30	35	25	18	14	8	2	41
558	62	2	4	1	3	2		4	2	0	0	1	0	0	0	0	0	0	0	0	0	0	1	40	14	53	3	14	9	47	64	19	15	38	22	26	25	22	14	6	9	31	0	0	0	0	0	0	0
559	46	2	1	3	3	4	3	3	3	0	0	0	0	1	0	0	0	0	0	0	0	0	1	30	12	44	3	10	9	60	47	29	32	29	26	19	30	22	22	17	9	34	0	0	0	0	0	0	0
560	48	2	1	3	2	3	2	2	4	0	0	0	0	0	0	0	0	0	0	0	0	0	0	46	16	56	3	4	6	78	77	35	36	35	31	41	36	28	19	2	3	54	0	0	0	0	0	0	0
561	63	1	2	2	2	3	1	2	2	0	0	0	0	0	0	0	0	0	0	0	0	0	0	40	12	40	3	7	10	72	79	32	34	37	30	40	36	30	16	9	7	46	0	0	0	0	0	0	0
562	54	1	1	3	3	4	4	2	3	0	0	1	0	0	0	0	0	0	0	0	0	0	1	41	14	51	3	6	9	56	70	31	23	38	31	30	32	21	20	19	5	46	0	0	0	0	0	0	0
563	57	1	1	3	3	4	4	3	3	0	0	0	0	0	0	0	0	0	0	0	0	0	0	48	16	59	7	4	11	77	84	36	36	41	30	41	36	30	21	0	1	36	0	0	0	0	0	0	0
564	58	1	1	2	2	4	3	3	3	0	0	0	1	0	0	0	0	0	0	0	0	0	1	37	15	59	6	6	12	72	86	33	36	42	31	42	36	29	21	3	6	36	0	0	0	0	0	0	0
565	56	2	2	1	3	4	4	3	4	0	0	0	0	0	0	0	0	0	0	0	0	0	0	43	15	54	5	11	11	71	71							24	24	3	6	51
566	45	1	1	3	2	4	1	1	3	0	0	0	0	0	0	0	0	0	0	0	0	0	0	43	16	60	7	4	8	50	87	32	33	35	25	31	32	27	14	1	1	24
567	45	1	1	3	2	4	4	4	3	0	0	0	0	0	0	0	0	0	0	0	0	0	0	39	14	44	1	7	7	60	81	32	35	42	30	38	36	23	19	8	4	51
568	47	2	1	3	3	4	2	1	3	1	0	1	0	0	0	0	0	0	0	0	0	0	1	32	13	56	4	7	9	52								27
569	62	2	3	2	3	2		2	2	0	0	0	0	0	0	0	0	0	0	0	0	0	0	47	15	52	8	15	8	65	67	22	32	33	28	41	29	30	24	6	8	32	0	0	0	0	0	0	0
570	57	1	2	1	3	4	3	3	2	0	0	0	0	0	0	0	0	0	0	0	0	0	0	38	15	60	3	8	9	54	69							14
571	51	1	1	3	3	4	4	2	4	0	0	1	0	0	1	0	0	0	0	0	0	0	1	41	14	48	6	7	12	67	69	30	28	28	25	33	31	23	24	7	4	40
572	46	1	2	1	2	4	2	2	3	0	0	0	0	0	0	0	0	0	0	0	0	0	0	41	16	56	6	5	8	64	70	32	32	35	30	31	29	25	13	1	3	29
573	48	2	1	3	3	4	3	2	3	0	0	0	0	0	0	0	0	0	0	0	0	0	0	37	11	49	4	7	7	59	56	27	22	25	23	34	27	30	18	4	1	33	0	0	0	0	0	0	0
574	48	1	4	5	2	1		3	2	0	0	0	0	0	0	0	0	0	0	0	0	0	0	38	16	59	3	5	10	64								35
575	46	2	1	3	3	4	3	3	3	0	0	0	0	0	0	0	0	0	0	0	0	0	0	43	14	57	8	9	10	59	62	32	27	26	27	34	35	32	15	6	4	31
576	47	2	1	3	3	1		3	3	0	0	0	0	0	0	0	0	0	0	0	0	0	0	42	13	56	8	10	6	48	48	27	29	35	23	32	22	22	18	19	12	40	0	0	0	0	0	0	0
577	43	2	1	2	3	4	3	3	3	1	0	0	0	0	0	0	0	0	0	0	0	0	1	44	16	57	5	5	9	76	77	30	25	39	30	38	36	32	20	2	3	50	0	0	0	0	0	0	0
578	46	2	1	3	3	4	2	3	3	0	0	0	0	0	0	0	0	0	0	0	0	0	0	44	16	59	4	5	8	59	76	31	26	35	31	35	28	30	16	0	2	37
579	56	2	2	4	3	4	2	3	3	0	0	1	0	0	0	0	0	0	0	0	0	0	1	43	15	55	5	5	9	63	61	31	16	38	30	41	29	25	15	2	3	35	0	0	0	0	0	0	0
580	54	1	1	2	3	4	3	4	2	1	0	1	0	0	0	0	0	0	1	0	0	0	1	30	11	38	2	20	5	44	37	14	29	30	22	26	18	24	14	33	12	27	0	0	0	0	0	0	0
581	55	2	1	3	3	4	3	3	3	0	0	0	0	0	0	0	0	0	0	0	0	0	0	37	14	52	3	17	7	63	69	28	21	33	24	38	27	30	13	13	5	39
582	56	1	1	3	3	4	3	3	3	0	0	0	0	0	0	0	0	0	0	0	0	0	0	43	16	59	1	5	11	69	80	35	32	42	26	29	36	26	12	1	2	30	0	0	0	0	0	0	0
583	56	2	1	3	3	4	3	2	4	0	0	0	0	1	0	0	0	0	0	0	0	0	1	26	13	29	7	16	10	46	45	19	19	31	16	31	24	24	20	12	9	23
584	45	2	4	3	3	4	3	4	3	0	0	0	0	0	0	0	0	0	0	0	0	0	0	32	9	31	4	18	11	39	36	14	9	17	12	21	22	17	14	25	7	14	0	0	0	0	0	0	0
585	56	2	1	3	2	4	2	2	2	0	0	1	0	0	0	0	0	0	0	0	0	0	1	28	14	52	4	13	8	55	49	21	31	30	24	29	26	19	14	14	10	31
586	50	2	4	1	3	4	3	3	3	0	0	0	0	0	0	0	0	0	0	0	0	0	0	36	13	41	8	11	9	71	66	32	34	34	28	42	33	20	20	11		55	0	0	0	0	0	0	0
587	53	1	1	3	2	4	2	3	3	0	0	1	0	0	0	0	0	0	0	0	0	0	1	29	11	43	6	7	7	63	58	27	26	38	25	32	30	27	14	9	6	30	0	0	0	0	0	0	0
588	47	1	4	2	3	4	3	2	3	0	1	1	0	0	0	0	0	0	0	0	0	0	1				4	6	6	64	76	27	32	40	28	36	33	33	17	1	2	35
589	60	2	2	1	3	4	3	2	2	0	0	0	0	0	0	0	0	0	0	0	0	0	0	34	14	45	2	11	10	62	64	26	21	31	23	32	30	23	21	9	5	36	0	0	0	0	0	0	0
590	44	1	1	3	3	4	4	1	3	0	0	0	0	0	0	0	0	0	0	0	0	0	0	41	15	55	8	8	8	67	75	30	32	36	28	37	34	30	17	5	4	45	0	0	0	0	0	0	0
591	50	2	4	3	3	4	4	2	4	0	0	0	0	0	0	0	0	0	0	0	0	0	0	38	15	54	7	5	8	76	80	33	36	39	31	37	35	32	19	8	4	33	0	0	0	0	0	0	0
592	48	2	4	4	3	4	3	4	3	0	0	0	0	0	0	0	0	0	0	0	0	0	0	35	14	51	4	10	8	50	46	12	18	26	23	22	16	14	20	16	5	40	0	0	0	0	0	0	0
593	52	2	1	3	3	4	3	4	3	0	0	0	0	0	0	0	0	0	0	0	0	0	0	41	15	52	3	16	12	71	76	35	24	38	29	33	36	31	18	2	12	33
594	54	1	1	3	3	4	4	4	4	0	0	1	0	0	0	0	0	0	0	0	0	0	1	43	15	44	1	8	6	62	77	30	30	38	24	21	32	21	18	0	5	33	0	0	0	0	0	0	0
595	54	2	1	3	2	4	2	2	3	0	0	1	0	0	0	0	0	0	0	0	0	0	1	46	16	60			10	59	81	27	29	33	26	33	29	27	13	0	5	30	0	0	0	0	0	0	0
596	61	2	4	6	2	4	2	3	2	0	0	1	0	0	0	0	0	0	0	0	0	0	1	42	15	57	0	9	10	58	64	28	35	28	27	35	27	28	23	4	10	49	0	0	0	0	0	0	0
597	66	1	1	2	3	2		4	4	1	0	0	0	0	0	0	0	0	0	0	0	0	1	50	16	56	11	7	12	62	86	27	26	42	30	24	29	22	17	1	2	22	0	0	0	0	0	0	0
598	57	1	1	3	3	4	4	2	3	0	0	1	0	1	0	0	0	0	0	0	0	0	1	35	15	60	4	12	8	75	78	33	35	44	28	37	28	32	20	2	5	38	0	0	0	0	0	0	0
599	43	2	1	3	3	3	3	4	3	0	0	1	0	0	0	0	0	0	0	0	0	0	1	37	13	52	6	6	7	65	79	27	31	29	24	34	35	30	21	2	2	37	0	0	0	0	0	0	0
600	49	2	2	2	3	4	3	4	3	0	0	0	0	0	0	0	0	0	0	0	0	0	0	37	12	42	5	9	5	61	59	26	33	29	21	35	27	17	19	12	9	43
601	56	2	4	3	3	4	3	4	3	0	0	0	0	0	0	0	0	0	0	0	0	0	0	39	16	45	9	10	12	61	66	30	28	33	28	36	30	21	17	6	5	42	0	0	0	0	0	0	0
602	50	1	2	3	3	4	4	4	3	0	0	1	0	0	0	0	0	0	0	0	0	0	1	40	14	50	6	6	9	69	76	33	28	42	29	35	33	23	17	6	4	26
603	47	1	4	3	3	4	3	3	3	0	0	1	0	0	0	0	0	0	0	0	0	0	1	39	14	51	4	10	7	49	71	22	25	34	23	27	14	20	16	7	7	20
604	53	1	1	2	3	4	4	3	3	0	0	0	0	0	0	0	0	0	0	0	0	0	0	35	14	46	4	9	6	61	68	31	33	42	28	40	33	21	17	7	6	51	0	0	0	0	0	0	0
605	66	1	1	2	2	2		2	3	0	0	0	0	1	0	0	0	0	0	1	0	0	1	31	12	36	1	14	12	63	52	29	29	34	26	28	36	24	15	12	7	20	0	0	0	0	0	0	0
606	46	2	2	6	2	4	2	4	4	0	0	0	0	0	0	0	0	0	0	0	0	0	0	36	15	54	5	5	7	55	54	22	32	34	23	37	33	33	20	4	4	47	0	0	0	0	0	0	0
607	52	1	2	2	2	4	2	4	3	0	1	0	0	0	0	0	0	0	0	0	0	0	1	35	14	49	6	4	10	54	75	29	29	43	31	37	19	21	17	2	4	39
608	46	1	1	3	3	4	4	2	3	0	0	0	0	0	0	0	0	0	0	0	0	0	0	39	15	58	7	8	9	58	73	29	28	39	27	32	27	25	17	2	6	36	0	0	0	0	0	0	0
609	52	2	2	1	2	4	2	4	2	0	0	1	0	0	0	0	0	0	0	0	0	0	1	36	11	34	5	16	6	62	69	31	34	36	24	35	27	24	17	4	7	39	0	0	0	0	0	0	0
610	65	1	4	1	3	2		4	2	1	0	1	0	1	0	0	0	0	0	0	0	0	1	21	10	33	6	8	9	37	51	14	14	22	19	20	15	17	16	17	3	34	0	0	0	0	0	0	0
611	43	2	4	2	3	4	3	4	3	0	0	0	0	0	0	0	0	0	0	0	0	0	0	29	13	50	4	12	7	49	56	26	19	35	20	29	21	17	15	7	3	18	0	0	0	0	0	0	0
612	55	1	1	3	2	4	2	3	3	1	0	0	0	0	0	0	0	0	0	0	0	0	1	39	11	56	5	7	10	54	48	20	21	29	21	27	25	23	14	18	11	26	0	0	0	0	0	0	0
613	54	2	1	3	2	4	2	2	3	0	0	1	0	0	0	0	0	0	0	0	0	0	1	40	15	57	2	6	9	58	78	32	32	38	30	31	20	22	14	6	1	47
614	51	2	1	3	3	3	3	4	4	0	0	1	0	0	0	0	0	0	0	0	0	0	1	45	15	52	3	4	9	75	69	29	30	31	26	26	32	28	20	6	1	43
615	50	1	1	3	3	4	4	1	3	1	0	1	0	1	0	0	0	0	1	0	0	0	1	30	8	39	2	15	5	51	40	20	10	34	18	27	22	19	15	30	8	20
616	55	2	2	4	2	4	2	2	2	0	0	0	0	0	0	0	0	0	0	0	0	0	0	30	14	39	2	12	8	53	61	25	27	36	33	34	24	15	11	11	9	40	0	0	0	0	0	0	0
617	62	2	1	2	3	4	4	4	3	0	1	0	0	0	0	0	0	0	0	0	0	0	1	40	15	57	10	10	13	61	72	32	36	37	28	39	34	28	26	7	3	43	0	0	0	0	0	0	0
618	63	1	1	2	3	1		4	3	0	0	1	0	0	0	0	0	0	0	0	0	0	1	44	16	58	15	6	10	62	75	27	28	30	26	33	30	23	19	1	5	34	0	0	0	0	0	0	0
619	57	1	1	3	2	4	2	2	3	0	0	0	0	0	0	0	0	0	0	0	0	0	0	38	13	39	6	6	6	63	56	29	20	32	25	36	32	20	14	5	4	25	0	0	0	0	0	0	0
620	48	1	1	2	3	4	3	2	3	0	0	0	0	0	0	0	0	0	0	0	0	0	0	35	14	57	7	5	5	69	67	26	22	36	25	37	31	30	17	3	5	37	0	0	0	0	0	0	0
621	49	1	1	3	3	4	3	3	4	0	0	0	0	0	0	0	0	0	0	0	0	0	0	48	14	56	8	5	10	61	68	28	30	37	28	39	32	29	17	9	6	36	0	0	0	0	0	0	0
622	54	2	1	3	2	1		4	3	0	0	1	0	0	0	0	0	0	0	0	0	0	1	29	10	30	3	9	8	41	53	14	21	30	21	28	13	18	11	44	4	24	0	0	0	0	0	0	0
623	46	2	4	6	2	4	1	3	2	0	0	0	0	0	0	0	0	0	0	0	0	0	0	45	14	44	9	8	6	63	61	26	21	29	25	33	25	19	13	11	5	34
624	50	1	1	3	2	4	4	2	3	0	0	1	0	0	0	0	0	0	0	0	0	0	1	42	15	54	12	7	8	55	58	32	34	39	26	32	34	28	17	6	4	36
625	50	2	4	1	3	3	3	4	2	0	0	1	0	0	0	0	0	0	0	0	0	0	1	26	15	54	8	22	6	71	69	23	30	37	26	40	29	32	25	25	17	45
626	43	2	1	3	3	3	1	3	3	0	0	0	0	0	0	0	0	0	0	0	0	0	0	38	16	51	4	8	6	63	57	28	30	31	26	34	28	20	14	7	8	40	0	0	0	0	0	0	0
627	53	1	1	3	3	4	4	2	4	0	0	0	0	0	0	0	0	0	0	0	0	0	0	43	14	44	9	7	9	62	62	28	16	43	28	34	31	26	15	5	5	25
628	46	2	1	2	1	4	2	1	3	0	0	0	0	0	0	0	0	0	0	0	0	0	0	39	16	60	1	8	6	64	78	28	31	36	28	29	30	23	14	6	3	55	0	0	0	0	0	0	0
629	58	1	1	3	3	4	3	4	3	0	0	1	0	0	0	0	0	0	0	0	0	0	1	39	12	55	5	6	10	58	51	23	20	28	23	31	26	20			8	22
630	49	1	1	3	3	4	4	3	4	0	0	1	0	0	0	0	0	0	0	0	0	0	1	36	12	42	1	15	8	38	51	20	17	30	23	23	16	15	12	14	6	24	0	0	0	0	0	0	0
631	43	1	4	5	3	4	4	4	3	0	0	0	0	0	0	0	0	0	0	0	0	0	0	44	14	59	9	6	9	47	54	20	32	34	25	35	12	19	17	6	1	33
632	64	2	1	2	3	2		4	4	0	0	0	0	0	0	0	0	0	0	0	0	0	0	41	13	54	0	17	8	43	55	26	16	32	18	41	25	24	13	23	11	34	0	0	0	0	0	0	0
633	47	1	1	3	2	4	2	3	3	1	0	1	0	0	0	0	0	0	0	0	0	0	1	38	11	48	4	12	8	59	59	27	20	36	27	31	28	23	17	8	5	27	0	0	0	0	0	0	0
634	47	1	1	2	2	4	2	3	3	0	0	0	0	0	0	0	0	0	0	0	0	0	0	37	15	49	0	5	9	58	79	31	28	26	29	34	35	28	17	7	5	31	0	0	0	0	0	0	0
635	57	2	2	3	3	4	4	3	3	0	0	0	0	0	0	0	0	0	0	0	0	0	0	40	16	45	8	13	8	60	73	32	31	41	30	38	29	22			12	38
636	54	2	2	3	2	4	4	2	4	0	0	1	0	0	0	0	0	0	0	1	0	0	1	42	16	41	3	7	8	75	72	34	33	36	29	32	35	28	19	4	6	38
637	43	2	4	1	3	4	4	4	3	0	0	0	0	0	0	0	0	0	0	0	0	0	0	38	15	59	4	13	8	55	47	25	26	27	26	39	24	22	16	2	6	36	0	0	0	0	0	0	0
638	51	1	1	2	1	3	1	2	3	0	0	0	0	0	0	0	0	0	0	0	0	0	0	34	16	48	4	5	11	63	69	25	20	34	29	35	29	27	7	5	3	16
639	48	2	2	1	3	4	4	3	2	0	0	0	0	0	0	0	0	0	0	0	0	0	0	37	14	53	1	7	8	61	68	29	35	34	30	34	32	31	18	8	5	45
640	56	2	1	3	2	3	2	3	4	0	0	0	0	1	0	0	0	0	0	1	0	0	1	39	14	43	3	12	11	54	62	28	19	24	24	29	31	26	15	12	8	25
641	58	2	2	4	2	1		4	2	0	0	0	0	0	0	0	0	0	0	0	0	0	0	42	15	57	2	12	5	64	72	27	36	42	25	34	26	21	16	8	7	41	0	0	0	0	0	0	0
642	51	2	1	2	2	4	2	2	2	0	0	1	0	0	0	0	0	0	0	0	0	0	1	33	12	36			8	59	63	18	33	37	22	40	21	21	17	9	5	36
643	50	2	1	3	3	4	3	4	3	0	0	0	0	0	0	0	0	0	0	0	0	0	0	34	14	60	10	4	7	53	64	18	33	41	24	38	19	22	19	14	6	36
644	63	2	1	2	3	3	3	3	4	1	0	1	0	0	0	0	0	0	0	0	0	1	1	32	14	19	5	9	10	55	58	31	33	32	24	29	24	31	24	0	8	43	0	0	0	0	0	0	0
645	53	2	1	3	3	3	2	3	3	0	0	0	0	0	0	0	0	0	0	0	0	0	0	41	16	53	5	8	11	66	78	34	36	42	29	40	33	28	18	6	6	47	0	0	0	0	0	0	0
646	55	2	1	3	2	4	3	4	3	0	0	0	0	0	0	0	0	0	0	0	0	0	0	38	12	42	8	12	8	62	68	29	30	33	21	37	29	17	13	6	5	39	0	0	0	0	0	0	0
647	62	1	1	6	2	4	2	2	3	0	0	0	0	0	0	0	0	0	0	0	0	0	0	35	14	52	7	11	10	55	53	16	22	36	19	21	19	22	12	10	4	24	0	0	0	0	0	0	0
648	57	2	1	3	2	4	2	4	3	0	0	0	0	0	1	0	0	0	0	0	0	0	1	37	14	46	9	12	10	60	63	31	28	39	26	33	31	24	11	9	6	31
649	59	1	1	3	3	4	4	3	3	1	0	1	0	0	0	0	0	0	0	0	0	0	1	42	12	54	7	8	8	62	40	23	19	36	22	29	24	20	10	26	7	34
650	54	1	2	1	3	4	3	2	3	0	0	1	0	0	0	0	0	0	0	0	0	0	1	47	16	52	4	7	10	80	79	36	36	35	35	42	36	28	20	0	3	33	0	0	0	0	0	0	0
651	57	2	1	2	3	4	2	2	4	0	0	0	0	0	0	0	0	0	0	0	0	0	0	46	16	56	9	8	11	62	77	30	31	37	30	40	28	23	22	5	5	41	0	0	0	0	0	0	0
652	61	1	1	3	2	4	4	2	3	0	0	1	0	0	0	0	0	0	0	0	0	0	1	30	12	47	4	6	8	58	66	26	18	36	29	25	30	31	13	8	9	27	0	0	0	0	0	0	0
653	48	1	4	2	2	4	4	3	3	0	1	1	0	0	0	0	0	0	0	0	0	0	1	42	15	50	5	11	11	60	78	35	25	34	30	33	29	22	13	4	11	32
654	54	2	1	3	3	4	2	4	3	0	0	0	0	0	0	0	0	0	0	0	0	0	0	41	15	58	4	6	9	60	75	35	36	39	29	36	34	26	14	0	5	48	0	0	0	0	0	0	0
655	44	1	4	3	3	4	4	3	3	1	0	1	0	0	0	0	0	0	0	0	0	0	1	46	13	54	6	4	8	64	67	26	21	35	28	39	33	32	18	11	2	40
656	44	2	4	6	2	4	2	4	3	0	0	0	0	0	0	0	0	0	0	0	0	0	0	28	12	56	8	11	6	52	53	22	18	35	23	35	16	19	17	19	8	28	0	0	0	0	0	0	0
657	57	2	1	3	2	4	2	3	3	0	0	1	0	0	0	0	0	0	0	0	0	0	1	41	12	40	9	8	9	65	60	23	36	30	26	38	32	29	13	18	2	43
658	54	2	1	3	3	4	4	2	4	0	0	0	0	0	0	0	0	0	0	0	0	0	0	40	13	55	10	10	9	61	67	30	30	39	25	35	32	30	20	12	5	33	0	0	0	0	0	0	0
659	47	1	1	3	3	4	4	4	3	0	0	0	0	0	0	0	0	0	0	0	0	0	0	46	16	52	5	5	9	60								26
660	57	2	3	4	3	4	4	3	3	0	0	1	0	0	1	0	0	0	0	1	0	0	1	32	12	39	3	11	10	47	48	23	30	31	21	29	24	20	20	8	6	36	0	0	0	0	0	0	0
661	60	2	1	3	3	3	3	3	4	0	0	1	0	0	0	0	0	0	0	1	0	0	1	40	16	60	9	7	9	66	78	35	36	41	31	42	35	27	20	1	3	44	0	0	0	0	0	0	0
662	51	2	4	2	3	4	3	3	4	0	0	0	0	0	0	0	0	0	0	0	0	0	0	41	16	58	7	7	11	66	75	36	35	41	30	37	29	30	14	4	3	39	0	0	0	0	0	0	0
663	61	2	2	2	3	4	3	2	3	0	0	0	0	1	0	0	0	0	0	0	0	0	1	33	15	52	5	18	10	62	72	31	33	41	28	38	30	20	18	6	12	42	0	0	0	0	0	0	0
664	58	2	4	4	2	4	1	4	2	0	0	0	0	0	1	0	0	0	0	0	0	0	1	36	8	23	6	7	9	80	75	30	36	36	26	41	34	21	21	6	1	39
665	61	1	1	3	2	4	4	3	4	0	0	1	0	0	0	0	0	0	0	0	0	0	1	42	14	56	7	8	11									29
666	55	1	1	3	2	1		2	2	0	0	1	1	0	0	0	0	0	0	0	0	0	1	29	15	41	5	7	10	55	61	27	16	28	23	33	27	26	15	17	6	22
667	66	1	1	2	3	4	4	4	4	1	0	0	0	0	0	0	0	0	0	0	0	0	1	38	12	42	5	14	5									21
668	45	1	1	3	3	4	4	3	3	0	0	0	0	0	0	0	0	0	0	0	0	0	0	38	10	41	8	11	8	60	54	24	17	26	27	36	26	28	13	11	6	25	0	0	0	0	0	0	0
669	46	2	4	5	1	1		2	2	0	0	1	0	0	0	0	0	0	0	0	0	0	1	22	12	32	5	11	4	46	44	22	21	29	22	38	15	21	10	4	7	27	0	0	0	0	0	0	0
670	63	2	3	1	2	1		4	1	0	0	0	0	1	0	0	0	0	0	0	0	0	1	35	14	55	9	5	11	65	65	26	29	31	25	26	26	22	17	32	12	39
671	55	1	4	6	2	1		4	2	0	1	0	0	0	0	0	0	0	0	0	0	0	1	39	16	49	11	6	7									20
672	43	1	1	3	2	4	2	4	3	0	0	0	0	0	0	0	0	0	0	0	0	0	0	44	16	52	11	8	7	59	76	33	33	39	29	37	26	23	13	4	4	33
673	46	1	1	3	3	4	4	4	4	0	0	0	0	0	0	0	0	0	0	0	0	0	0	46	15	47	3	10	10	64	67	29	21	33	26	34	31	24	20	3	3	33	0	0	0	0	0	0	0
674	58	2	1	3	3	3	3	4	3	0	0	1	0	1	0	0	0	0	0	0	0	0	1	30	13	56	9	6	7	55	45	20	18	31	24	24	25	21	19	15	4	29
675	43	2	1	3	2	4	2	3	3	0	0	0	0	0	1	0	0	0	0	0	0	0	1	33	14	47	2	4	6	63	62	29	19	26	27	30	27	22	9	4	4	28	0	0	0	0	0	0	0
676	42	2	1	3	3	4	4	4	4	0	0	0	0	0	0	0	0	0	0	0	0	0	0	37	14	52	5	6	7	57	60	26	31	27	25	35	33	29	19	9	10	33	0	0	0	0	0	0	0
677	58	2	1	3	2	4	4	2	2	0	0	0	0	0	0	0	0	0	0	1	0	0	1	36	15	56	5	6	10	49	73	23	23	34	18	30	18	31	20	8	6	32	0	0	0	0	0	0	0
678	64	1	1	2	2	2		2	3	1	0	1	0	0	0	0	0	0	0	0	0	0	1	38	14	51	8	7	12	64	68	31	30	35	30	32	31	22	20	6	6	43	0	0	0	0	0	0	0
679	44	2	4	3	3	3	3	2	3	0	0	0	0	0	0	0	0	0	0	0	0	0	0	44	16	60	2	5	10	72	72	34	27	36	28	37	34	26	20	3	4	36	0	0	0	0	0	0	0
680	45	1	1	3	3	4	3	4	3	0	0	0	0	0	0	0	0	0	0	0	0	0	0	38	12	51	4	12	5	59	61	29	31	31	27	35	33	26	23	13	7	30
681	53	2	4	1	2	4	2	3	2	0	0	0	0	0	0	0	0	0	0	0	0	0	0	41	14	50	8	10	8	56	66	29	28	36	26	29	28	25	17	3	6	38	0	0	0	0	0	0	0
682	58	2	3	4	1	4	2	4	2	0	0	0	0	1	0	0	0	0	0	0	0	0	1	37	14	42	5	5	9	55	60	30	24	36	26	32	29	25	15	7	9	32	0	0	0	0	0	0	0
683	63	1	1	2	2	1		4	2	1	1	1	1	0	0	0	0	0	0	0	0	0	1	30	11	59	1	6	12	69	59	28	23	32	27	30	28	19	13	13	4	33	0	0	0	0	0	0	0
684	54	2	2	4	3	4	3	4	2	0	0	0	0	0	0	0	0	0	0	0	0	1	1	37	15	50	4	11	9	57	60	25	29	37	23	33	26	24	22	8	5	37	0	0	0	0	0	0	0
685	49	2	1	3	3	3	3	2	2	0	0	0	0	0	0	0	0	0	0	0	0	0	0	39	16	60	10	4	8	64	78	31	24	35	29	41	32	29	17	1	1	34	0	0	0	0	0	0	0
686	54	2	4	3	3	1		4	2	0	0	0	0	0	0	0	0	0	0	0	0	0	0	28	10	21	3	8	9	47	43	17	23	31	19	35	18	18	23	15	2	45	0	0	0	0	0	0	0
687	42	1	1	3	2	4	2	2	3	0	0	0	0	0	0	0	0	0	0	0	0	0	0	42	15	56	1	9	8	72	74	33	22	36	28	34	31	27	17	1	7	34
688	56	2	1	3	3	4	2	3	3	0	0	0	0	1	0	0	0	0	0	0	0	0	1	38	15	47	8	10	10	60	62	27	21	33	28	35	31	20	11	4	8	45	0	0	0	0	0	0	0
689	55	2	1	3	2	4	2	4	3	0	0	0	0	0	0	0	0	0	0	0	0	0	0	40	13	60	6	5	8	67	72	27	36	26	30	39	34	32			2	46
690	60	2	1	3	3	4	2	2	4	1	0	0	0	0	0	0	0	0	0	0	0	0	1	48	16	54	4	7	6	51	69	33	34	40	29	31	33	20	12	0	4	29	0	0	0	0	0	0	0
691	44	2	4	1	3	4	3	2	2	0	0	0	0	0	0	0	0	0	0	0	0	0	0	35	14	52	4	9	6	59	66	26	34	33	26	30	29	25	18	9	6	39	0	0	0	0	0	0	0
692	57	2	1	2	3	4	3	2	3	0	0	0	0	0	0	0	0	0	0	0	0	0	0	41	14	56	6	12	12	66	64	30	34	36	29	37	35	26	19	5	7	50
693	51	2	1	3	3	4	3	2	2	0	0	0	0	0	0	0	0	0	0	0	0	0	0	44	15	48	4	6	9	48	50	27	29	38	26	40	31	24	19	8	5	40	0	0	0	0	0	0	0
694	62	1	1	4	3	4	3	4	3	0	0	0	0	0	0	0	0	0	0	0	0	0	0	39	13	44	2	7	13	51	67	25	22	31	25	33	28	19	18	7	3	18	0	0	0	0	0	0	0
695	57	1	1	2	3	4	4	2	3	0	0	0	0	0	0	0	0	0	0	0	0	0	0	47	15	54	10	6	8	66	70	31	33	40	30	39	36	30	19	8	2	40	0	0	0	0	0	0	0
696	44	1	1	3	3	4	4	3	4	0	0	0	0	0	0	0	0	0	0	0	0	0	0	44	12	55	3	7	11	77	74	33	26	32	29	35	30	29	21	10	7	42	0	0	0	0	0	0	0
697	43	2	1	2	3	4	4	2	3	1	0	0	0	0	0	0	0	0	0	0	0	0	1	37	14	47	4	10	6	54	60	26	33	21	24	35	29	30	24	9	5	37
698	43	2	1	3	3	4	3	3	3	0	0	0	0	0	0	0	0	0	0	0	0	0	0	42	16	57	5	8	10	71	79	34	35	39	29	36	35	31	20	4	4	42	0	0	0	0	0	0	0
699	54	2	2	3	3	4	3	3	2	0	0	0	0	0	0	0	0	0	0	0	0	0	0	38	13	54	9	7	7	53	54	22	28	28	22	27	24	22	15	6	6	31
700	44	2	1	3	3	4	3	4	3	1	0	0	0	0	0	0	0	0	0	0	0	0	1	22	8	54	1	17	6	50	51	25	14	29	20	29	20	18	14	34	11	31	0	0	0	0	0	0	0
701	45	2	2	4	3	4	4	3	3	0	0	0	0	0	0	0	0	0	0	0	0	0	0	37	12	60	10	7	8	72	65	34	26	38	26	42	27	22	19	10	4	46	0	0	0	0	0	0	0
702	61	2	1	3	3	4	3	4	4	1	1	0	0	0	0	0	0	0	0	0	0	0	1	37	15	48	5	10	11	66	68	28	36	38	29	40	34	28	20	2	4	41	0	0	0	0	0	0	0
703	52	2	1	3	3	4	3	2	4	0	0	0	0	0	0	0	0	0	0	0	0	0	0	43	16	54	11	5	11	63	76	30	35	37	30	42	34	25	21	3	1	40	0	0	0	0	0	0	0
704	63	1	1	3	3	1		4	4	0	0	0	1	0	0	0	0	0	0	0	0	1	1	33	12	51	5	5	10	44	59	26	25	36	24	32	26	20	15	8	1	31	0	0	0	0	0	0	0
705	64	1	1	2	3	4	4	2	4	0	0	0	0	0	0	0	0	0	0	0	0	0	0	43	14	50	7	5	8	62	66	27	31	29	25	36	29	25	20	8	5	31	0	0	0	0	0	0	0
706	61	1	1	2	3	2		2	3	0	0	1	0	0	0	0	0	0	0	0	0	0	1	44	14	53	9	4	11	59	67	32	23	31	25	35	27	25	17	1	3	39	0	0	0	0	0	0	0
707	58	2	1	3	3	3	3	2	3	0	0	0	0	0	0	0	0	0	0	0	0	0	0	46	15	42	6	5	12	67	73	31	20	29	27	33	29	23	21	9	4	20
708	42	1	4	1	2	4	4	4	2	0	0	1	0	0	0	0	0	0	0	0	0	0	1	33	10	42	12	12	1	38	57	20	35	31	19	36	17	21	15	12	8	41	0	0	0	0	0	0	0
709	50	2	4	1	3	1		4	1	0	0	0	0	1	0	0	0	0	0	0	0	0	1	40	14	36	10	6	9	47	53	17	33	33	25	33	14	18	22	10	6	43	0	0	0	0	0	0	0
710	49	1	4	1	3	4	4	1	4	0	0	0	0	0	0	0	0	0	0	0	0	0	0	39	12	54	9	16	11	67	79	33	28	43	30	42	35	28	15	0	2	39	0	0	0	0	0	0	0
711	46	2	1	3	3	4	3	3	3	0	0	0	0	0	0	0	0	0	0	0	0	0	0	38	14	44	1	4	9	63	63	30	27	31	24	36	33	31	17	3	5	34	0	0	0	0	0	0	0
712	64	2	3	1	2	2		1	1	0	0	0	0	1	0	0	0	0	0	0	0	0	1	34	14	60	1	5	7	58	54	28	27	33	25	33	33	19	14	9	4	31	0	0	0	0	0	0	0
713	64	2	2	5	2	3	1	4	2	0	0	0	0	0	0	0	0	0	0	0	0	0	0	35	15	44	3	5	9	76	87	36	36	40	31	37	36	31	21	0	6	37	0	0	0	0	0	0	0
714	44	1	1	3	2	4	2	4	3	0	0	0	0	0	0	0	0	0	0	0	0	0	0	37	14	49	8	10	5	56	61	29	11	31	22	35	29	31	9	20	7	19	0	0	0	0	0	0	0
715	43	2	1	3	2	4	2	4	3	0	0	1	0	0	0	0	0	0	0	0	0	0	1	29	10	52	3	7	8	70	59	28	31	24	22	39	29	20	12	20	6	55	0	0	0	0	0	0	0
716	60	2	3	1	3	2		4	1	0	0	1	0	0	0	0	0	0	0	0	0	0	1	43	16	56	13	15	5	67	75	33	36	34	29	35	30	26	18	2	9	45	0	0	0	0	0	0	0
717	42	2	1	3	2	4	2	2	3	0	0	0	0	0	0	0	0	0	0	0	0	0	0	38	14	53	4	9	6									27
718	60	2	4	1	3	1		2	1	0	0	0	0	0	0	0	0	0	0	0	0	0	0	35	12	59	7	7	8	54	63	16	20	39	23	20	19	12	16	18	3	43	0	0	0	0	0	0	0
719	60	2	2	4	3	4	3	4	3	0	0	0	0	0	0	0	0	0	0	0	0	0	0	43	14	53	7	6	12	60	75	30	33	35	27	37	30	28	25	10	7	41	0	0	0	0	0	0	0
720	48	1	1	3	3	3	3	4	3	0	0	1	0	0	0	0	0	0	0	0	0	0	1	36	15	50	5	10	8	74	81	36	34	34	27	33	36	24	25	2	4	49
721	57	2	2	6	3	3	1	1	1	1	0	0	0	1	0	0	0	0	0	0	0	0	1	34	14	37	4	15	10	73	68	31	33	34	29	38	32	32	21	1	7	32	0	0	0	0	0	0	0
722	55	2	4	3	3	3	4	2	3	0	0	0	0	0	0	0	0	0	0	0	0	0	0	50	16	58	8	9	9	68	76	34	36	43	31	38	35	29	24	1	4	56
723	61	2	4	2	3	4	3	4	3	0	0	0	0	0	0	0	0	0	0	0	0	0	0	41	16	58	6	15	10	68	77	33	31	36	32	39	34	29	22	2	9	44	0	0	0	0	0	0	0
724	58	1	1	2	3	3	3	4	3	1	0	1	0	0	0	0	0	0	0	0	0	0	1	35	15	58	7	4	8	65	74	31	20	31	29	41	31	32	18	4	6	31
725	53	2	1	3	2	4	2	3	3	0	0	0	0	0	0	0	0	0	0	0	0	0	0	40	15	58	8	11	10	58	55	34	35	40	27	39	29	24	13	6	3	38	0	0	0	0	0	0	0
726	59	2	1	3	3	4	3	2	3	0	0	0	0	0	0	0	0	0	0	0	0	0	0	38	14	54	8	8	10	75	66	33	30	35	28	37	33	28	20	7	10	33
727	52	2	1	3	3	4	4	2	3	0	0	0	0	0	0	0	0	0	0	0	0	0	0	37	11	60	1	6	8	45								19
728	49	1	1	3	2	4	4	1	3	1	0	1	0	0	0	0	0	0	0	0	0	0	1	32	12	55	8	11	8	61	56	26	21	35	28	31	28	22	16	15	10	34
729	50	2	1	3	3	4	3	4	4	0	0	0	0	0	0	0	0	0	0	0	0	0	0	35	15	46	2	7	8	56	62	22	31	32	24	31	23	25	21	0	6	35	0	0	0	0	0	0	0
730	44	1	4	3	2	4	2	2	3	0	0	0	0	0	0	0	0	0	0	0	0	0	0	35	13	60	7	10	9	51	58	22	24	25	23	32	21	26	12	19	7	32	0	0	0	0	0	0	0
731	66	2	1	2	3	2		4	3	0	0	0	0	0	0	0	0	0	0	0	0	0	0	44	12	51	7	7	9	60	75	29	29	29	26	37	31	26	18	8	6	31	0	0	0	0	0	0	0
732	57	1	1	3	3	4	4	2	3	1	1	0	0	0	0	0	0	0	0	0	0	0	1	42	14	34	5	12	12	58	59	28	19	33	23	28	27	20			7	27
733	50	2	1	3	3	3	3	2	3	0	0	0	0	0	0	0	0	0	0	0	0	0	0	35	13	41	1	19	8	55	67	27	33	35	23	32	29	29	20	11	10	29
734	47	2	1	6	3	3	3	3	3														0	44	14	53	3	7	8	63	74	32	29	31	25	35	35	31	14	13	1	41	0	0	0	0	0	0	0
735	54	1	1	3	3	4	2	2	3	1	0	0	0	0	0	0	0	0	0	0	0	0	1	44	16	57	5	8	12	70	87	35	35	32	30	38	36	32	22	1	9	50
736	43	1	1	3	3	4	4	4	3	0	0	0	0	0	1	0	0	0	0	0	0	0	1	43	14	47	3	6	8	64	65	29	20	36	24	29	34	25	14	10	2	31	0	0	0	0	0	0	0
737	55	1	1	3	1	4	1	2	2	0	0	1	0	1	0	0	0	0	0	0	0	0	1	41	13	56	7	9	6	73	81	35	35	43	31	42	36	35	10	7	10	19	0	0	0	0	0	0	0
738	55	2	2	5	3	4	4	3	3	0	0	0	0	0	0	0	0	0	0	0	0	0	0	40	14	55	5	9	11	57	72	27	35	39	27	36	26	29	21	8	7	33
739	57	2	2	4	3	1		4	2	1	0	1	0	0	0	0	0	0	0	1	0	0	1	33	15	47	6	13	12	69	65	27	31	36	28	32	29	23	20	13	11	39
740	51	2	1	3	2	4	3	2	3	0	0	0	0	0	0	0	0	0	0	0	0	0	0	40	15	56	7	9	10	63								23			7	44
741	48	2	2	4	3	3	2	4	3	0	0	0	0	0	0	0	0	0	0	0	0	0	0	34	12	53	5	6	8	64	71	30	35	37	28	31	29	22	20	8	5	47
742	57	1	1	3	3	4	4	2	4	1	0	1	1	0	0	0	0	0	0	0	0	0	1	41	16	57	1	5	9	71	73	33	27	35	30	42	34	33	21	8	5	44	0	0	0	0	0	0	0
743	58	1	2	1	3	2		3	2	0	0	1	0	0	0	0	0	0	0	0	0	0	1	41	14	49	6	6	10									21					0	0	0	0	0	0	0
744	48	2	4	1	3	4	4	4	3	0	0	1	0	0	0	0	0	0	0	0	0	0	1	36	13	42	6	8	11	57	50	28	32	30	30	36	30	26	22	13	6	37
745	45	2	1	3	2	4	2	2	4	0	0	0	0	0	0	0	0	0	0	0	0	0	0	39	12	57	4	11	10	47	42	20	22	28	20	21	23	21	8	13	9	27	0	0	0	0	0	0	0
746	55	1	1	2	2	3	4	4	3	0	0	0	0	0	0	0	0	0	0	0	0	0	0	41	16	58	8	6	10	65	72	29	33	36	31	41	31	25	20	7	6	31	0	0	0	0	0	0	0
747	46	2	4	1	3	4	3	3	2	0	0	0	0	0	0	0	0	0	0	0	0	0	0	41	11	45	0	7	8	80	78	36	36	43	31	40	36	32	22	10	9	42	0	0	0	0	0	0	0
748	49	1	1	3	3	3	3	4	4	0	0	1	1	0	0	0	0	0	0	0	0	0	1	43	14	49	6	4	6	53	68	28	35	29	26	36	19	21	24	12	4	35
749	53	2	3	3	3	4	3	4	3	0	0	0	0	0	0	0	0	0	0	0	0	0	0	40	14	50	13	5	12	73	62	26	26	34	27	35	31	27	20	9	4	40
750	50	1	2	6	2	4	3	4	3	0	0	0	0	0	0	0	0	0	0	0	0	0	0	42	12	56	6	7	13	62	75	31	30	37	24	35	32	29	19	11	5	47
751	43	2	1	2	3	4	3	4	3	0	0	0	0	0	0	0	0	0	0	0	0	0	0	41	15	57	3	8	10	63	83	30	30	36	27	33	30	30	23	6	3	39
752	61	1	1	3	2	2		3	3	0	0	0	0	0	0	0	0	0	1	0	0	0	1	40	16	47	4	8	8	78	62	22	26	31	19	28	29	35	16	17	5	33	0	0	0	0	0	0	0
753	50	2	1	3	3	2		2	3	0	0	0	0	1	0	0	0	0	0	1	0	0	1	18	13	30	5	22	8	47	49	22	25	22	19	28	26	19	16	7	17	42	0	0	0	0	0	0	0
754	65	2	1	2	3	2		4	2	1	0	0	0	0	0	0	0	0	0	0	0	0	1	40	16	60	8	5	13	76	71	32	26	39	30	37	32	34	16	9	8	33
755	44	1	4	1	2	4	2	3	2	0	0	0	0	0	0	0	0	0	1	0	0	0	1	34	12	47	5	8	9	41	58	17	22	24	24	30	17	17	18	7	7	36
756	52	2	1	3	1	3	1	3	3	0	0	0	0	1	0	0	0	0	0	1	0	0	1	38	12	46	3	7	7	65	70	28	31	26	25	33	31	21	14	7	4	42
757	45	1	4	1	3	4	2	2	2	0	0	0	0	0	0	0	0	0	0	0	0	0	0	28	8	39	1	22	5	43	35	11	21	26	23	24	12	18	17	43	19	30	0	0	0	0	0	0	0
758	55	2	4	5	3	4	4	4	3	0	0	0	0	0	0	0	0	0	0	0	0	0	0	25	12	42	0	8	10	39	43	13	24	31	24	24	13	20	20	28	8	16	0	0	0	0	0	0	0
759	61	2	2	1	3	4	2	2	2	1	1	0	0	1	0	0	0	0	0	0	0	1	1	33	12	51	2	16	8	52	61	25	25	32	24	26	27	19	13	9	5	48
760	43	1	1	3	3	4	4	2	3	0	0	0	0	0	0	0	0	0	0	0	0	0	0	32	13	58	5	4	4	54	66	22	26	23	24	33	27	27	21	2	4	44	0	0	0	0	0	0	0
761	54	2	1	3	3	1		2	3	0	0	0	0	1	0	0	0	0	0	0	0	0	1	43	15	48	9	11	10	77	74	32	32	31	29	35	34	33	22	6	7	47	0	0	0	0	0	0	0
762	57	1	1	3	2	4	2	2	3	0	0	0	0	0	0	0	0	0	0	0	0	0	0	40	13	52	1	5	4	41								17
763	43	1	1	3	3	4	3	3	3	0	0	0	0	0	0	0	0	0	0	0	0	0	0	47	16	57	3	4	7	64	74	31	27	39	28	31	29	29	20	3	2	38	0	0	0	0	0	0	0
764	63	2	4	4	3	4	4	4	3	0	0	1	0	0	0	0	0	0	0	0	0	0	1	42	13	47	3	9	7	51	50	24	32	28	22	36	22	22	20	10	10	47	0	0	0	0	0	0	0
765	46	2	1	3	2	3	2	3	3	0	0	0	0	0	0	0	0	0	0	0	0	0	0	31	12	53	3	4	7	43	44	20	23	28	20	21	19	20	16	22	7	26	0	0	0	0	0	0	0
766	50	2	4	6	2	3	2	4	1	0	0	0	0	0	0	0	0	0	0	0	0	0	0	38	15	56	4	10	9	49	68	24	29	35	27	30	26	21	19	8	5	42	0	0	0	0	0	0	0
767	61	2	2	4	3	4	3	2	3	0	0	1	0	1	0	0	0	0	0	0	0	0	1	33	15	58	8	12	13	54	64	22	13	33	23	33	26	22	19	6	13	12	0	0	0	0	0	0	0
768	45	1	1	3	3	4	4	3	3	0	0	0	0	0	0	0	0	0	0	0	0	0	0	41	16	50	5	4	8	56	70	29	32	37	27	31	28	26	19	1	2	27
769	54	2	4	3	2	4	2	3	3	0	0	0	0	0	0	0	0	0	0	0	0	0	0	35	14	44	3	4	7	69	82	30	30	34	25	35	27	24	13	10	1	49	0	0	0	0	0	0	0
770	46	2	1	3	3	4	2	4	3	0	0	0	0	0	0	0	0	0	0	0	0	0	0	38	14	55	6	9	5	60	64	26	28	27	21	36	26	22	15	9	5	38
771	47	1	1	1	2	4	1	3	2	1	0	0	0	0	1	0	0	0	0	0	0	0	1	32	14	60	13	17	12	60	64	29	15	35	30	38	32	32	14	8	13	44
772	63	2	2	4	3	4	3	4	3	0	1	1	0	1	0	0	0	0	0	0	0	0	1	37	15	43	4	8	8	68	74	33	36	26	28	32	31	30	19	5	4	40	0	0	0	0	0	0	0
773	44	2	2	2	2	4	3	2	2	0	0	0	0	0	0	0	0	0	0	0	0	0	0	40	12	53	4	6										24
774	43	2	2	4	3	4	4	3	3	0	0	0	0	0	0	0	0	0	0	0	0	0	0	32	12	50	5	8										22
775	65	2	3	1	3	3	3	3	3	0	0	0	0	0	0	0	0	0	0	0	0	0	0	42	12	54	5	9										27
776	48	1	1	3	2	4	2	2	3	0	0	0	0	0	0	0	0	0	0	0	0	0	0	39	12	47	3	10										25
777	47	2	1	3	3	4	4	4	3	0	0	0	0	0	0	0	0	0	0	0	0	0	0	44	16	45	2	4										30
778	57	2	1	3	3	4	3	3	2	0	0	1	0	0	0	0	0	0	0	0	0	0	1	40	12	43	5	5										35
779	55	1	1	3	3	1		2	3	1	0	1	0	0	0	0	0	0	1	0	0	0	1	31	12	55	1	11										23
780	49	2	4	1	3	4	3	4	3	0	0	1	0	0	0	0	0	0	0	1	0	0	1	31	8	50	6	11										23
781	55	2	4	1	3	4	3	4	2	0	0	1	0	0	0	0	0	0	0	0	0	0	1	38	15	57	5	12										21
782	65	2	1	2	3	1		4	2	1	1	1	0	1	0	0	0	0	0	0	0	0	1	38	15	52	7	9										17
783	53	2	1	3	3	4	4	3	3	0	0	0	0	0	0	0	0	0	0	0	0	0	0	42	12	51	9	5										27
784	64	1	2	3	3	2		3	3	0	0	0	0	0	0	0	0	0	0	0	0	0	0	37	14	50	8	5										16
785	54	2	1	3	3	4	2	4	4	0	0	0	0	0	0	0	0	0	0	0	0	0	0	41	15	54	5	8										20
786	56	1	1	3	2	4	2	2	3	1	0	1	1	1	0	0	0	0	1	0	0	0	1	37	13	42	2	13										24
787	47	2	1	3	2	4	3	1	3	1	0	0	0	0	0	0	0	0	0	0	0	0	1	36	13	59	11	6										34
788	44	2	1	3	3	4	2	3	3	1	0	0	0	1	0	0	0	0	0	1	0	0	1	38	13	55	1	18										29
789	46	1	1	2	2	4	3	2	2	0	0	0	0	0	0	0	0	0	0	0	0	0	0	26	16	20	0	14										19
790	47	1	1	3	2	4	2	3	3	0	0	1	0	0	0	0	0	0	0	0	0	0	1	31	14	58	11	8										30
791	47	2	1	3	3	1		4	2	0	0	0	0	0	0	0	0	0	0	0	0	0	0	31	14	48	2	19										28
792	63	2	1	2	3	2		4	3	0	0	1	0	0	0	0	0	0	0	0	0	0	1	42	12	44	6	7										26
793	48	1	4	3	2	4	2	3	3	0	0	1	0	0	0	0	0	0	0	0	0	0	1	35	15	44	0	10										26
794	54	2	2	4	3	4	3	2	2	0	0	0	0	0	0	0	0	0	0	0	0	0	0	29	9	47	0	16										19
795	50	2	2	3	3	4	3	4	2	0	0	0	0	0	0	0	0	0	0	0	0	0	0	40	15	52	1	9										30
796	56	2	2	1	3	3	3	3	3	0	0	1	0	0	0	0	0	0	0	0	0	0	1	29	13	31	4	14										25
797	52	2	4	4	3	4	3	4	2	0	0	0	0	0	0	0	0	0	0	0	0	0	0	37	12	42	5	4										26
798	58	2	2	4	3	4	2	2	2	0	0	1	0	0	0	0	0	0	0	0	0	0	1	41	16	59	3	4										29
799	45	1	1	3	3	4	4	3	4	0	0	0	0	0	0	0	0	0	1	0	0	0	1	41	16	60	4	14										21
800	48	1	1	3	2	2		2	3	0	0	1	0	0	0	0	0	0	0	0	0	0	1	37	12	55	1	5										25
801	58	2	2	4	3	4	4	4	3	0	0	0	0	0	0	0	0	0	0	0	0	0	0	45	14	49	5	10										26
802	51	2	1	3	2	4	2	2	3	0	0	0	0	1	0	0	0	0	0	1	0	0	1	31	14	41	1	19										20
803	42	2	4	1	3	4	2	1	2	0	0	0	0	0	0	0	0	0	0	0	0	0	0	41	12	45	6	16	7	59	59	31	36	37	30	41	31	25	16	7	4	54	0	0	0	0	0	0	0
804	47	2	1	3	3	4	4	4	4	0	0	0	0	0	0	0	0	0	0	0	0	0	0	43	14	56	0	4	7	49	70	28	34	25	25	22	21	19	16	2	3	26
805	46	2	1	3	2	1		2	3	1	0	0	0	0	0	0	0	0	0	0	0	0	1	42	14	48	3	7	9	62	59	29	34	37	23	38	35	33	17	12	5	39
806	43	2	1	3	3	4	3	2	3	0	0	0	0	0	0	0	0	0	0	0	0	0	0	40	13	50	7	9	8	59	62	27	30	30	21	35	26	17	14	22	6	23
807	52	2	2	2	3	4	3	1	3	0	0	0	0	0	0	0	0	0	0	0	0	0	0	35	12	53	8	12	8	59	52	25	27	34	25	35	27	33	17	16	7	22	0	0	0	0	0	0	0
808	59	2	2	4	2	4	2	1	2	0	0	0	0	0	0	0	0	0	0	0	0	0	0	43	14	54	6	4	10	78								33
809	52	2	4	1	3	4	4	4	3	0	0	0	0	0	0	0	0	0	0	0	0	0	0	37	14	32	3	7	8	56	61	24	30	30	31	37	23	18	16	13	6	41
810	62	1	1	2	3	2		4	3	1	0	0	0	1	0	0	0	0	0	1	0	1	1	27	14	37	0	4	11	61	80	30	35	42	30	38	23	29	21	16	5	40	0	0	0	0	0	0	0
811	54	2	1	3	3	4	2	3	3	0	0	1	0	0	0	0	0	0	0	0	0	0	1	41	12	48	11	6	10	80	83	35	32	41	30	42	36	35	18	4	6	30	0	0	0	0	0	0	0
812	62	1	2	1	3	4	4	4	3	0	0	0	0	0	0	0	0	0	0	0	0	0	0	47	16	60	14	9	12	77	59	32	31	35	29	35	31	29	18	7	8	29	0	0	0	0	0	0	0
813	52	1	2	1	2	4	2	4	2	0	0	1	0	0	0	0	0	0	0	0	0	0	1	40	16	60	10	6	12	70	57	26	29	38	27	42	31	28	23	2	2	33
814	49	2	1	3	1	4	2	3	2	0	0	1	0	0	0	0	0	0	0	0	0	0	1	36	11	48	4	19	9	57	54	17	15	37	23	30	23	22	9	25	15	29
815	60	2	1	2	3	3	2	4	3	0	0	1	0	1	0	0	0	0	0	0	0	0	1	29	12	39	5	10	10									24
816	50	2	2	4	2	4	2	2	2	0	0	0	0	0	0	0	0	0	0	0	0	0	0	28	12	49	4	7	9	58	59	33	34	31	27	42	27	24	22	8	5	54	0	0	0	0	0	0	0
817	51	2	1	3	2	4	4	2	4	0	0	1	0	0	1	0	0	0	0	0	0	1	1	36	14	51	8	7	8	58	65	28	27	22	22	22	27	24
818	62	1	1	2	2	4	2	2	3	0	1	0	1	0	0	0	0	0	1	0	0	0	1	32	14	45	3	8	9	67	59	30	30	31	25	29	34	28	15	3	8	43
819	59	2	1	2	3	4	4	2	4	1	0	1	0	0	0	0	0	0	0	0	0	0	1	40	13	45	0	9	8	55	51	23	25	25	18	36	23	21	18	20	6	17
820	61	2	1	2	3	1		4	2	1	0	1	0	1	0	0	0	0	0	0	0	0	1	30	14	44	0	16	10	75	80	28	35	23	22	37	31	28	19	11	5	46
821	47	2	1	3	3	4	3	3	3	0	0	0	0	0	0	0	0	0	0	0	0	0	0	36	14	48	2	9	8	66	77	25	29	44	30	36	25	31	19	3	5	29	0	0	0	0	0	0	0
822	47	2	1	3	3	4	4	3	4	0	0	0	0	0	0	0	0	0	0	0	0	0	0	42	15	58	4	5	9	79	80	36	27	37	31	42	36	34	20	6	2	48	0	0	0	0	0	0	0
823	44	1	1	3	3	4	4	3	3	0	0	0	0	0	0	0	0	0	0	0	0	0	0	42	16	48	9	9	7	44	63	20	22	38	24	40	14	22	21	7	6	31
824	60	2	4	4	3	4	2	4	3	0	0	0	0	0	0	0	0	0	0	0	0	0	0	32	14	57	3	6	6	52	58	20	22	33	21	27	24	23	16	11	9	39	0	0	0	0	0	0	0
825	61	2	1	3	2	1		3	2	0	0	1	0	0	0	0	0	0	0	0	0	0	1	36	16	45	2	7	9	63	67	26	33	39	30	38	29	28	18	5	4	26	0	0	0	0	0	0	0
826	49	1	1	3	3	4	4	3	4	0	0	1	0	0	0	0	0	0	0	0	0	0	1	34	12	40	0	11	9	49	49	15	30	30	20	28	18	23	21	18	10	28
827	65	2	1	2	3	4	4	4	3	0	0	1	0	0	0	0	0	0	1	0	0	0	1	37	13	55	0	6	9	53	61	20	34	30	26	40	30	28	14	10	7	30	0	0	0	0	0	0	0
828	62	2	1	3	3	4	4	3	3	0	0	0	0	0	0	0	0	0	0	0	0	0	0	41	16	49	5	4	9	64	66	30	20	39	29	28	30	29	14	10	0	26	0	0	0	0	0	0	0
829	47	2	1	3	2	1		4	2	0	1	0	0	0	0	0	0	0	0	0	0	0	1	34	12	52	4	7	11	56	43	22	18	34	21	28	23	24	13	24	9	46
830	54	2	1	3	3	4	3	4	3	0	0	0	0	0	0	0	0	0	0	0	0	0	0	39	12	40	12	13	8	78	73	32	29	28	28	39	28	27	23	11	6	44	0	1	1	1	0	0	0
831	46	1	1	3	2	4	4	4	3	1	0	1	0	0	0	0	0	0	0	0	0	0	1	39	13	40	11	17	8	65	66	34	31	37	28	39	29	27	13	12	7	41
832	51	1	3	4	3	4	4	4	3	0	0	0	0	0	0	0	0	0	0	0	0	0	0	48	16	59	6	5	8	76	74	32	31	37	30	36	35	29	18	1	3	36	0	0	0	0	0	0	0
833	48	2	1	3	3	4	3	2	3	0	0	1	0	0	0	0	0	0	0	0	0	0	1	45	16	56	6	5	6	72	81	36	35	43	31	38	35	32	19	0	2	34	0	0	0	0	0	0	0
834	45	2	1	3	3	1		2	3	0	0	0	0	0	0	0	0	0	0	0	0	0	0	38	15	51	4	8	10	55	71	26	33	35	26	39	30	25	18	11	5	43	0	0	0	0	0	0	0
835	44	2	4	3	3	4	4	4	4	0	0	1	0	0	0	0	0	0	0	0	0	0	1	45	16	41	5	6	9	80	86	36	32	43	30	39	34	27	20	0	3	49
836	46	1	1	3	2	4	2	2	3	0	0	1	0	0	0	0	0	0	0	0	0	0	1	34	15	55	4	4	6	58	55	25	25	31	19	30	29	26	17	8	6	40
837	51	2	2	6	2	4	2	3	2	0	0	0	0	0	0	0	0	0	0	0	0	1	1	34	13	37	6	4	8	62	72	23	32	28	28	33	29	23	15	5	3	29	0	0	0	0	0	0	0
838	60	1	1	2	3	4	3	2	3	1	0	1	0	0	0	0	0	0	0	0	0	0	1	42	15	49	11	5	13	69	71	30	31	34	27	38	35	26	20	4	4	43	0	0	0	0	0	0	0
839	47	1	1	3	3	4	1	2	3	0	0	1	0	0	0	0	0	0	0	0	0	0	1	39	16	52	1	5	5	74	74	36	36	38	30	41	36	31	19	5	4	47
840	54	2	1	3	3	3	3	3	3	0	0	1	0	0	0	0	0	0	0	0	0	0	1	37	15	60	5	4	6	63	72	33	36	36	22	41	33	32	19	10	1	36	0	0	0	0	0	0	0
841	57	2	2	1	3	4	3	4	2	0	0	1	0	0	0	0	0	0	0	0	0	0	1	37	14	56	6	10	10	62	63							29
842	49	2	1	3	2	4	2	3	3	0	0	0	0	0	0	0	0	0	0	0	0	0	0	38	12	47	3	7	9	67	67	29	33	32	27	39	32	25			6	37
843	63	1	2	4	3	4	4	3	2	0	0	0	0	0	0	0	0	0	0	0	0	0	0	38	16	48	9	11	10	58	59	23	19	29	27	32	28	22	13	5	4	27	0	0	0	0	0	0	0
844	62	1	1	3	3	4	4	4	3	0	0	0	0	1	0	0	0	0	0	1	0	0	1	39	16	59	0	8	8	61	64	30	25	29	26	34	35	25	12	11	8	30	0	0	0	0	0	0	0
845	46	1	1	3	2	4	2	2	4	0	0	0	0	0	0	0	0	0	0	0	0	0	0	39	14	55	5	5	10	26	71	28	29	34	26	35	32	25
846	62	2	3	2	2	4	2	4	3	0	0	1	0	0	0	0	0	0	0	0	0	0	1	37	13	38	5	10	8	60	63	27	33	29	30	32	32	24	16	4	8	34
847	48	2	1	3	2	4	2	3	3	1	0	0	0	0	0	0	0	0	0	0	0	1	1	38	16	40	1	16	9	75	73	28	28	36	22	35	24	22	14	7	7	28
848	55	1	1	3	3	4	4	3	3	1	0	0	1	0	0	0	0	0	0	0	0	0	1	44	16	49	3	7	8	72	73	29	27	31	27	28	31	24	18	6	6	47	0	0	0	0	0	0	0
849	66	2	1	2	3	1		3	3	1	0	1	0	1	0	0	0	0	0	0	0	0	1	31	12	25	5	11	7	63	62	30	10	24	29	29	35	31	12	10	3	17	0	0	0	0	0	0	0
850	66	2	1	3	3	2		3	4	0	0	1	0	0	0	0	0	0	0	0	0	0	1	39	13	47	6	5	12	74	68	28	22	36	24	34	31	24	19	15	4	32	0	0	0	0	0	0	0
851	59	2	1	2	2	4	2	3	4	0	0	0	0	0	0	0	0	0	0	0	0	0	0	30	9	48	1	10	8	47	59	28	27	37	20	34	20	23	17	39	10	30
852	42	2	1	3	3	1		4	4	0	0	1	0	0	0	0	0	0	0	0	0	0	1	43	15	60	13	9	12	59	74	30	21	37	27	36	32	26	19	1	5	32	0	0	0	0	0	0	0
853	54	2	1	3	3	4	2	4	3	0	0	1	0	0	0	0	0	0	0	0	0	0	1	33	12	47	5	18	8	66	58	26	25	31	27	36	34	24			7	33
854	56	2	1	2	2	4	2	2	3	0	0	0	0	1	0	0	0	0	0	0	0	0	1	38	15	56	7	7	8	70	69	34	25	26	24	33	34	23	13	11	2	29	0	0	0	0	0	0	0
855	64	1	1	2	3	4	4	3	4	0	0	1	0	0	0	0	0	0	0	0	0	0	1	41	16	45	4	11	10									29
856	60	2	1	3	3	4	4	2	4	0	1	1	0	1	0	0	0	0	0	1	0	0	1	19	12	45	3	18	9	51	58	18	29	28	21	25	24	25	21	21	13	37	0	0	0	0	0	0	0
857	47	2	1	3	2	4	2	2	3	0	0	0	0	0	0	0	0	0	0	0	0	0	0	37	13	58	1	11	5	76	79	28	17	43	28	35	35	29	13	7	7	10	0	0	0	0	0	0	0
858	65	2	1	2	2	2		4	3	0	0	1	0	0	0	0	0	0	0	0	0	0	1	43	16	56	7	5	8	60	65	29	23	36	26	34	33	28	15	1	5	19	0	0	0	0	0	0	0
859	45	2	4	1	3	3	2	4	2	0	0	0	0	0	0	0	0	0	0	0	0	0	0	38	13	48	11	8	10	55	62	29	30	18	22	36	30	20	22	6	3	38
860	52	2	1	3	3	4	3	3	3	0	0	0	0	0	0	0	0	0	0	1	0	0	1	28	14	58	2	12	7	53	63	19	26	31	23	26	25	26	21	7	12	34	0	0	0	0	0	0	0
861	44	2	1	2	3	4	4	3	4	0	0	0	0	0	0	0	0	0	0	0	0	0	0	48	16	54	6	6	9	65	72	35	30	38	30	36	26	28	17	0	2	48	0	0	0	0	0	0	0
862	66	2	4	2	3	3	4	2	4	0	0	1	0	0	0	0	0	0	0	0	0	0	1	35	11	43	4	6	5	61	62	29	31	28	25	26	24	27	20	12	7	45	0	0	0	0	0	0	0
863	47	2	4	1	3	4	3	4	2	0	0	1	0	0	0	0	0	0	0	0	0	0	1	43	16	50	8	7	10	64	85	26	28	39	30	39	27	25	21	0	6	46	0	0	0	0	0	0	0
864	54	2	1	2	2	1		1	2	0	0	0	0	0	0	0	0	0	0	0	0	0	0	35	15	43	4	6	6	52	49	20	25	35	16	21	15	18	14	22	2	38
865	49	1	1	3	3	1		4	3	0	0	0	0	0	0	0	0	0	0	0	0	0	0	43	14	56	14	6	13	74	79	34	30	43	30	42	36	35	22	8	4	42	0	0	0	0	0	0	0
866	51	2	1	3	3	4	4	3	4	1	1	1	0	0	1	0	0	1	0	0	0	0	1	36	13	56	8	8	8									25
867	60	1	1	3	3	1		3	3	0	0	1	0	0	0	0	0	0	0	0	0	0	1	31	13	55	0	6	11	63	65	28	32	36	20	39	31	20	18	10	4	31	0	0	0	0	0	0	0
868	52	2	2	4	2	4	2	4	2	0	0	0	0	0	0	0	0	0	0	0	0	0	0	41	13	32	8	9	8	50	50	14	24	23	19	23	17	20	16	15	8	40
869	49	2	4	1	3	4	4	3	3	0	0	0	0	0	0	0	0	0	0	0	0	0	0	42	15	58	7	9	10	58	80	32	22	38	31	35	34	32	15	21	5	39	0	0	0	0	0	0	0
870	55	2	1	2	3	4	4	4	4	0	0	0	0	0	0	0	0	0	0	0	0	0	0	47	16	53	6	5	8	76	87	34	36	31	30	37	34	25	23	5	6	51	0	0	0	0	0	0	0
871	58	1	1	3	2	4	2	2	3	0	0	0	0	0	0	0	0	0	0	0	0	1	1	38	14	53	4	7	7	57	60	25	17	33	25	38	31	28	15	0	5	31	0	0	0	0	0	0	0
872	65	1	2	1	1	2		4	2	0	0	0	0	0	0	0	0	0	0	0	0	0	0	35	11	58	8	11	8	60	68	25	36	33	28	36	28	24	9	6	7	43	0	0	0	0	0	0	0
873	57	1	1	3	3	4	4	4	3	0	0	0	0	1	0	0	0	0	0	1	0	0	1	42	16	55	6	10	1	63	72	32	29	40	31	37	26	21	16	5	9	32	0	0	0	0	0	0	0
874	46	2	1	3	3	4	3	4	3	0	0	0	0	1	0	0	0	0	0	0	0	0	1	36	14	50	3	7	6	65	69	30	30	38	29	38	33	31	17	8	6	42
875	56	2	1	3	3	4	3	4	4	0	0	0	0	0	0	0	0	0	0	0	0	0	0	36	13	57	10	12	9	59	59	25	28	30	27	31	32	29
876	58	2	1	2	3	4	4	3	3	1	1	1	0	0	0	0	0	0	0	0	0	0	1	42	15	60	5	5	12	75	88	35	30	38	31	38	36	29	22	0	1	40	0	0	0	0	0	0	0
877	65	1	1	3	2	1		2	2	1	1	1	1	1	0	0	0	1	1	0	0	0	1	21	10	38	1	20	7	55	62	23	30	43	21	18	28	22	15	20	10	37
878	59	1	1	3	2	4	2	3	3	0	0	0	1	0	0	0	0	0	0	0	0	0	1	36	14	57	6	7	7	64	70	21	15	33	26	37	28	21	13	5	5	20
879	64	1	1	2	3	2		4	2	1	0	1	0	0	0	0	0	0	1	0	0	0	1	41	16	53	3	4	10	60	55	25	26	34	23	25	30	30	22	2	3	37	0	0	0	0	0	0	0
880	56	2	2	1	2	4	2	4	2	0	0	0	0	0	0	0	0	0	0	1	0	0	1	42	15	52	6	10	8	54	67	27	19	30	23	30	19	23	15	13	8	32	0	0	0	0	0	0	0
881	56	2	1	5	3	1		3	2	0	0	1	0	0	0	0	0	0	0	0	0	0	1	42	14	39	14	5	9	60	60	27	30	29	23	33	30	24	22	24	11	37
882	51	2	2	4	3	4	2	4	2	0	0	0	0	0	0	0	0	0	0	0	0	0	0	31	13	33	4	12	10	53	52	13	30	27	20	30	17	17	12	10	4	29	0	0	0	0	0	0	0
883	60	2	2	4	3	4	4	4	3	0	0	1	0	0	0	0	0	0	0	0	0	0	1	33	11	50	10	10	9	50	44	19	28	33	20	24	18	21	24	11	8	39	0	0	0	0	0	0	0
884	59	1	1	3	2	4	2	4	3	0	0	1	0	1	1	0	0	0	0	0	0	0	1	29	14	38	5	14	11	50	54	25	18	29	20	28	30	19	17	17	8	31	0	0	0	0	0	0	0
885	55	1	1	2	2	2		2	2	0	0	0	0	1	1	0	0	0	0	1	0	0	1	26	16	32	10	17	11	59	65	23	31	30	26	32	24	28	13	9	7	29	0	0	0	0	0	0	0
886	50	1	1	3	3	4	4	3	3	0	0	0	0	0	0	0	0	0	0	0	0	0	0	39	14	57	8	6	8	66	78	30	29	37	30	31	31	24	18	7	8	31	0	0	0	0	0	0	0
887	48	1	1	3	3	4	2	3	3	0	0	1	0	0	0	0	0	0	0	0	0	0	1	27	11	52	2	11	6	60	69	27	30	34	25	29	28	19	12	2	5	35	0	0	0	0	0	0	0
888	46	1	1	3	2	4	2	4	3	0	0	0	0	0	0	0	0	0	0	0	0	0	0	37	13	57	6	10	3	74	70	32	32	25	29	30	30	24	14	16	7	30	0	0	0	0	0	0	0
889	48	2	1	3	1	1		3	3	0	0	0	0	0	0	0	0	0	0	0	0	0	0	44	16	56	6	6	11	60	70	33	36	34	31	41	36	26	16	7	4	44	0	0	0	0	0	0	0
890	65	2	3	1	3	2		4	2	0	0	1	0	0	0	0	0	0	0	1	0	1	1	34	15	55	5	11	11	69	78	33	25	36	27	42	33	31	23	7	6	41
891	44	1	1	2	3	3	3	4	2	1	0	1	0	0	0	0	0	0	0	0	0	0	1	34	14	43	2	17	5	64	59	25	31	37	28	39	33	27	20	7	6	33	0	0	0	0	0	0	0
892	56	2	1	2	2	3	2	2	3	0	0	0	0	0	0	0	0	0	0	0	0	0	0	49	16	60	8	4	10	72	81	36	36	34	31	38	36	30	18	1	1	46
893	56	2	1	3	3	4	3	3	3	0	0	1	0	0	0	0	0	0	0	0	0	0	1	40	13	52	5	7	9	59	76	31	31	35	27	34	35	26	17	17	3	32
894	45	2	1	2	2	3	2	3	2	0	0	0	0	0	0	0	0	0	0	0	0	0	0	45	16	57	5	5	8									24
895	55	2	4	4	2	4	1	2	1	0	0	1	0	0	0	0	0	0	0	0	0	0	1	29	13	41	2	13	6	55	53	23	23	36	27	25	23	19	11	15	3	22	0	0	0	0	0	0	0
896	58	1	1	3	1	4	2	4	3	1	0	0	0	0	0	0	0	0	0	0	0	0	1				13	8	9	71	69	28	26	31	28	40	36	29	6	14	9	35	0	0	0	0	0	0	0
897	52	2	1	3	2	4	2	3	3	1	0	1	0	0	0	0	0	0	0	0	0	0	1	41	12	34	4	6	7	64	52	23	15	33	18	29	25	23
898	45	2	1	3	3	4	2	3	3	0	0	0	0	0	0	0	0	0	0	0	0	0	0	40	14	49	10	6	7	63	75	28	28	34	28	31	25	20	15	6	7	31	0	0	0	0	0	0	0
899	51	1	4	5	2	4	2	3	2	0	0	0	0	0	0	0	0	0	0	0	0	0	0	40	14	56	4	5	11	57	67	32	21	31	34	40	29	30	11	5	6	25
900	43	1	4	1	3	4	2	3	2	0	0	0	0	0	0	0	0	0	0	0	0	0	0	40	14	48	7	16	8	57	66	23	25	19	25	21	19	17	15	7	5	46	0	0	0	0	0	0	0
901	49	1	4	1	2	4	2	4	2	0	0	1	0	0	0	0	0	0	0	0	0	0	1	44	15	48	9	11	10	64	64	26	31	34	29	39	30	32	21	5	6	31	0	0	0	0	0	0	0
902	50	1	4	1	3	1		4	1	0	0	0	0	0	0	0	0	0	0	0	0	1	1	20	7	32	2	11	9	54	66	33	31	36	24	38	31	25	18	6	6	29
903	52	2	1	4	2	3	1	2	2	0	0	0	0	0	0	0	0	0	0	1	0	0	1	37	14	49	4	11	10	70	62	30	28	34	23	23	32	32	15	19	4	37	0	0	0	0	0	0	0
904	48	2	4	1	3	4	3	4	2	0	0	0	0	0	0	0	0	0	0	0	0	0	0	25	14	55	2	17	10	59	52	25	14	37	25	37	28	9	21	14	9	39	0	0	0	0	0	0	0
905	60	1	1	3	3	4	4	3	4	0	0	1	0	0	0	0	0	0	0	0	0	0	1	41	16	59	8	6	9	72	65	25	25	29	24	34	30	23	17	8	6	38	0	0	0	0	0	0	0
906	55	2	2	4	2	4	2	3	2	0	0	0	0	0	0	0	0	0	0	0	0	0	0	44	12	50	3	8	11	51								29
907	61	1	2	6	3	4	4	3	3	0	0	1	0	0	0	0	0	0	1	0	0	0	1	35	15	58	2	4	7	54	67	30	22	38	30	25	23	14	16	8	3	38	0	0	0	0	0	0	0
908	46	2	4	2	2	4	1	3	3	0	0	0	0	1	0	0	0	0	0	0	0	0	1	38	15	48	12	7	7	65	73	30	34	37	27	37	31	22	17	3	1	47
909	49	2	1	3	3	4	3	3	3	0	0	0	0	0	0	0	0	0	0	0	0	0	0	32	14	56	7	10	7	54	64	21	32	26	21	27	25	27	17	16	7	37
910	52	2	1	3	2	3	2	2	3	0	0	0	0	0	0	0	0	0	0	0	0	0	0	37	15	43	6	6	9	60	71	24	20	39	25	40	30	24	10	11	6	26	0	0	0	0	0	0	0
911	47	2	1	3	3	4	3	2	3	0	0	0	0	0	0	0	0	0	0	0	0	0	0	35	14	46	0	9	7	51	46	23	19	29	26	31	21	23	17	13	6	38	0	0	0	0	0	0	0
912	48	1	4	1	2	3	2	4	1	0	0	0	0	1	0	0	0	0	0	0	0	0	1	25	13	50	6	11	5	54	38	15	15	37	17	36	22	25	11	21	10	20
913	52	2	1	3	2	4	2	1	2	0	0	0	0	0	0	0	0	0	0	0	0	0	0	46	16	59	6	4	14	79	75	35	36	43	31	42	36	31	22	2	4	37	0	0	0	0	0	0	0
914	54	2	1	3	3	3	3	1	3	0	0	1	0	0	0	0	0	0	0	0	0	0	1	28	12	24	4	17	12	60	55	25	34	31	20	36	26	33	16	15	10	36	0	0	0	0	0	0	0
915	44	2	4	3	3	4	2	3	3	0	0	0	0	0	0	0	0	0	0	0	0	0	0	38	11	52	2	14	4	61	66	23	20	33	32	36	26	22	15	11	5	32	0	0	0	0	0	0	0
916	46	1	4	2	3	1		4	3	0	0	0	0	0	0	0	0	0	0	0	0	0	0	44	16	60	3	4	8	56	60	29	18	41	27	24	23	15	19	0	1	15	0	0	0	0	0	0	0
917	48	2	1	3	3	4	3	3	3	0	0	0	0	0	0	0	0	0	0	0	0	0	0	40	15	59	3	6	10	61	78	35	35	38	28	33	32	26	24	4	0	40	0	0	0	0	0	0	0
918	55	1	1	3	2	4	2	4	3	1	0	0	0	0	0	0	0	0	0	0	0	0	1	44	16	56	8	6	11	64	71	27	22	28	27	34	34	31	7	4	5	41
919	45	1	1	3	2	4	2	3	3	0	0	0	0	0	0	0	0	0	0	0	0	0	0	44	14	49			10									25
920	51	2	4	4	3	4	3	3	2	0	0	0	0	0	0	0	0	0	0	0	0	0	0	42	16	59	8	4	5	60	63	20	16	33	18	33	22	26	13	4	6	18
921	52	2	3	4	1	4	2	3	2	0	0	0	0	0	0	0	0	0	0	0	0	0	0	35	12	31	4	7	9	58	43	21	12	38	23	36	20	17	12	23	6	23
922	43	2	1	3	3	1		2	3	0	0	0	0	0	0	0	0	0	0	0	0	0	0	41	13	45	1	10	5	57	57	28	28	38	23	35	25	23	22	19	8	41	0	0	0	0	0	0	0
923	54	1	1	3	3	4	3	3	3	1	0	1	0	0	0	0	0	0	0	0	0	0	1	42	13	42	6	10	11	63	58	24	25	37	26	36	28	21	17	11	8	33	0	0	0	0	0	0	0
924	53	2	1	2	3	4	3	4	3	0	0	0	0	0	0	0	0	0	0	0	0	0	0	38	13	41	6	16	10	54	56	21	23	33	19	29	22	20	19	13	7	43	0	0	0	0	0	0	0
925	44	2	1	3	3	4	3	3	4	0	0	0	0	0	0	0	0	0	0	0	0	0	0	36	16	51	3	10	8	67	73	34	30	40	29	36	34	24	17	3	5	27	0	0	0	0	0	0	0
926	63	2	3	2	1	2		1	2	0	0	0	0	0	0	0	0	0	0	0	0	0	0	48	16	53	5	6	10	80	70	28	27	39	31	40	36	28	9	13	5	17
927	46	2	1	3	2	3	4	2	2	0	0	0	0	0	0	0	0	0	0	0	0	0	0	33	10	42	2	9	5	60	68	26	24	31	23	33	27	22	13	16	7	32	0	0	0	0	0	0	0
928	46	1	1	3	2	4	2	2	2	1	0	0	0	0	0	0	0	0	0	0	0	0	1	39	12	55	1	4	8									23
929	54	1	4	3	3	4	3	4	3	0	0	0	0	0	0	0	0	0	0	0	0	0	0	41	15	48	5	7	11	62	78	26	25	29	30	39	34	29	14	3	4	39
930	50	1	1	2	3	4	3	3	3	0	0	0	0	0	0	0	0	0	0	0	0	0	0	38	14	59	6	6	11	61	72	22	31	38	24	29	29	32	19	3	6	31
931	65	2	4	1	3	2		3	3	0	0	1	0	0	0	0	0	0	0	0	0	0	1	40	14	50	9	10	13	58	67	30	30	35	29	36	31	24	19	12	6	45
932	49	2	1	3	2	4	2	2	2	0	0	0	0	0	0	0	0	0	0	0	0	0	0	34	16	55	1	8	11	53	54	25	27	37	29	34	25	23	21	7	3	35
933	66	2	2	1	2	2		4	1	0	0	0	0	1	0	0	0	0	0	0	0	0	1	34	15	40	4	8	9	73	67	27	31	37	31	40	31	29	20	8	11	42	0	0	0	0	0	0	0
934	47	2	1	3	3	4	2	4	3	0	1	0	0	0	0	0	0	0	0	0	0	0	1	38	13	59	2	11	7	54	71	27	23	38	25	30	23	29	17	4	8	44	0	0	0	0	0	0	0
935	62	1	1	2	3	4	3	3	3	0	0	1	0	0	0	0	0	0	0	0	0	0	1	44	14	52	9	10	13	53	66	27	20	30	24	38	28	31	14	10	6	30	0	0	0	0	0	0	0
936	51	2	2	3	3	4	4	2	3	0	0	0	0	0	0	0	0	0	0	0	0	0	0	46	15	60	5	4	9	64	67	30	28	37	27	34	29	28	17	1	2	31	0	0	0	0	0	0	0
937	58	2	1	3	3	4	2	3	4	0	0	1	0	0	1	0	0	0	0	0	0	0	1	41	13	56	3	6	8	61	64	26	23	22	24	32	31	29
938	49	1	1	3	1	4	2	1	3	0	0	0	0	0	0	0	0	0	0	0	0	0	0	47	16	58	5	5	10									31
939	65	1	1	2	2	2		4	2	0	0	0	0	0	0	0	0	0	0	0	0	0	0	36	15	48	9	9	12	64	63	25	23	29	23	26	25	24
940	50	2	2	3	2	1		3	2	0	0	0	0	1	0	0	0	0	0	0	0	0	1	23	12	46	9	14	10	46	53	24	7	39	25	42	24	16	13	28	14	12	0	0	0	0	0	0	0
941	56	2	1	3	2	4	2	3	3	0	0	0	0	0	0	0	0	0	0	0	0	0	0	39	14	53	2	8	6	48	55	26	28	26	23	26	25	23	22	13	10	35	0	0	0	0	0	0	0
942	52	2	1	3	3	4	3	2	3	1	0	0	0	0	0	0	0	0	0	0	0	0	1	40	16	60	2	5	9	64	64	23	22	22	27	38	32	32	19	2	5	38
943	65	1	1	3	3	2		3	4	1	1	0	0	0	0	0	0	0	0	0	0	0	1	37	13	52	7	10	10	59	67	27	32	30	29	34	28	26	22	14	7	31	0	0	0	0	0	0	0
944	45	1	1	3	2	4	2	3	2	0	0	1	0	0	0	0	0	0	0	0	0	0	1	35	14	52	5	7	9	54	64	28	20	36	26	30	25	22	17	6	5	31
945	44	1	1	2	3	4	4	1	2	0	0	0	0	0	0	0	0	0	0	0	0	0	0	30	13	45	5	10	7	55	65	25	28	28	26	37	26	23	22	6	5	40	0	0	0	0	0	0	0
946	54	2	2	4	2	4	1	2	3	0	1	0	0	0	0	0	0	0	0	0	0	0	1	33	12	44	2	13	10	51	56	21	20	26	22	30	25	27	15	12	6	9
947	46	2	1	3	3	4	3	3	3	0	0	0	0	0	0	0	0	0	0	0	0	0	0	41	14	51	4	6	6	58	73	33	35	32	26	32	30	22	22	4	2	45	0	0	0	0	0	0	0
948	56	2	2	4	3	4	3	3	4	1	0	0	0	0	0	0	0	0	0	0	0	0	1	43	15	53	6	4	9	61	69	32	29	40	31	42	34	26	19	3	4	41	0	0	0	0	0	0	0
949	55	1	1	1	3	4	3	3	3	0	0	0	0	1	0	0	0	0	0	1	0	0	1	41	15	57	6	6	8	61	74	29	36	40	30	35	29	27	17	6	3	40	0	0	0	0	0	0	0
950	50	2	2	4	3	4	3	2	3	0	0	0	0	0	0	0	0	0	0	0	0	0	0	39	15	60	10	6	6	72	53	26	35	29	29	35	32	23	23	2	3	29	0	0	0	0	0	0	0
951	54	2	1	3	3	4	3	4	3	0	0	0	0	0	0	0	0	0	0	0	0	0	0	33	13	55	6	10	7	49	55	26	35	20	23	42	21	29	21	17	7	43	0	0	0	0	0	0	0
952	51	2	4	1	2	4	3	2	3	0	0	1	0	0	0	0	0	0	0	0	0	0	1	38	15	54	5	6	10	66	64	32	29	36	27	28	31	28	11	5	4	33
953	64	1	2	4	2	4	4	1	2	0	1	0	0	0	0	0	0	0	0	1	0	0	1	41	15	44	3	7	10	72	72	30	30	41	29	40	35	24	17	7	7	37	0	0	0	0	0	0	0
954	58	2	2	5	2	4	2	3	2	0	1	0	0	1	0	0	0	0	0	0	0	0	1	28	16	45	2	5	11	58	52	23	20	28	22	28	23	31	18	11	6	27	0	0	0	0	0	0	0
955	57	1	2	3	2	4	2	4	3	0	1	0	0	0	0	0	0	0	1	0	0	0	1	41	15	60	1	15	10	68	64	31	21	36	27	29	30	27
956	50	2	1	3	3	4	4	4	4	0	0	1	0	0	0	0	0	0	0	0	0	0	1	39	13	55	3	6	9	64	66	31	32	38	29	35	31	30	19	10	3	49	0	0	0	0	0	0	0
957	42	2	1	3	3	4	3	2	3	0	0	0	0	0	0	0	0	0	0	0	0	0	0	39	12	47	6	8	9	66	67	33	35	39	31	42	32	24	19	7	2	32
958	54	1	1	3	2	4	4	3	3	0	0	0	0	0	0	0	0	0	0	0	0	0	0	46	15	54	5	5	9	75	67	32	33	36	31	32	30	28	16	3	4	31	0	0	0	0	0	0	0
959	59	1	2	4	2	4	2	2	3	1	0	1	0	0	0	0	0	0	0	0	0	0	1	45	14	54	12	10	7	64	70	27	24	35	29	27	29	34	17	11	10	29
960	60	1	1	3	3	4	2	3	3	0	0	0	0	0	0	0	0	0	0	0	0	0	0	32	14	58	3	8	11	68	70	23	26	26	26	32	28	25	20	12	11	42	0	0	0	0	0	0	0
961	46	1	2	4	3	4	4	4	3	0	0	1	0	0	0	0	0	0	0	0	0	0	1	43	14	56	8	7	7	72	72	34	29	42	31	42	35	34	24	2	4	48
962	63	1	1	3	1	4	1	4	2	0	0	1	0	0	0	0	0	0	0	0	0	0	1	43	15	47	8	5	8	61	59	22	29	33	24	34	30	28	11	9	3	26
963	44	1	1	2	3	4	4	2	3	0	0	0	0	0	0	0	0	0	0	0	0	0	0	42	14	59	2	5	5	61	84	29	35	41	21	38	35	31	20	4	6	34
964	43	1	1	3	3	4	4	3	4	0	0	0	0	0	0	0	0	0	0	0	0	0	0	45	14	60	5	7	9	74	52	33	23	43	30	42	34	32	20	6	2	35
965	57	2	1	3	2	3	2	1	4	0	0	0	0	0	0	0	0	0	0	0	0	0	0	34	12	45	7	6	10	56								30	20	9
966	46	1	1	3	3	4	3	3	3	0	0	1	0	0	0	0	0	0	0	0	0	0	1	41	14	57	7	5	10	64	59	26	16	35	25	40	31	32	16	7	4	36
967	53	2	2	4	2	4	2	4	3	0	0	0	0	0	0	0	0	0	0	0	0	0	0	33	14	49	4	11	8	57	61	22	32	41	28	38	24	20	15	10	9	36
968	44	2	2	3	3	4	3	4	3	0	0	0	1	0	0	0	0	0	0	0	0	0	1	27	11	48	9	9	12	38	64	23	33	35	24	23	19	23	16	4	4	26
969	55	2	1	3	3	4	2	4	3	0	0	1	0	0	0	0	0	0	0	0	0	0	1	36	16	38	3	7	9	63	61	27	24	38	26	32	27	24	15	16	6	33	0	0	0	0	0	0	0
970	59	2	1	2	2	4	2	4	3	0	0	1	0	0	0	0	0	0	0	0	0	0	1	40	15	58	4	7	13	61	77	30	33	41	29	37	32	30	16	8	6	44	0	0	0	0	0	0	0
971	58	2	4	1	3	4	3	4	2	0	0	0	0	0	0	0	0	0	0	1	0	0	1	32	14	37	1	10	10	48	46	22	19	28	21	25	20	23	16	4	11	34	0	0	0	0	0	0	0
972	47	2	1	3	1	4	1	3	2	0	0	0	0	0	0	0	0	0	0	0	0	0	0	41	13	48	11	6	9	57	61	20	28	26	22	34	29	25	9	10	7	42
973	65	2	1	2	1	4	1	2	3	0	0	0	0	0	0	0	0	0	0	0	0	0	0	31	12	37	9	15	8	46	44	19	22	30	26	40	25	16	8	11	10	42	0	0	0	0	0	0	0
974	50	2	1	3	2	4	2	2	3	0	0	1	0	0	0	0	0	0	0	0	0	0	1	33	13	45	2	24	8	43	53	15	23	33	24	38	18	24	15	15	12	43	0	0	0	0	0	0	0
975	53	1	4	1	3	4	4	4	3	0	0	0	0	0	0	0	0	0	0	0	0	0	0	34	15	51	3	5	7	60	75	24	28	32	26	29	28	13	15	0	3	34	0	0	0	0	0	0	0
976	59	2	2	4	3	3	4	1	2	1	0	0	0	0	0	0	0	0	0	0	0	0	1	38	15	53	4	11	8	65	65	31	23	28	27	37	31	30	25	9	9	28	0	0	0	0	0	0	0
977	56	1	2	3	3	4	4	4	4	0	0	0	0	0	0	0	0	0	0	0	0	0	0	41	16	56	8	4	12	66	80	32	33	33	30	37	31	29	25	1	3	46	0	0	0	0	0	0	0
978	62	1	1	3	1	4	4	3	3	1	0	0	0	0	0	0	0	0	0	0	0	0	1	35	9	37	7	12	8	62	62	25	34	27	23	25	25	19	13	16	6	52
979	47	2	4	3	2	4	2	1	2	0	0	0	0	0	0	0	0	0	0	0	0	0	0	31	12	43	1	14	8	53	49	27	19	28	24	27	27	20	15	14	7	24	0	0	0	0	0	0	0
980	44	1	1	3	2	4	2	3	3	0	0	0	0	0	0	0	0	0	0	0	0	0	0	38	14	60	5	6	10	73	71	31	35	47	31	36	34	32	20	10	5	44	0	0	0	0	0	0	0
981	48	2	1	3	3	4	3	4	3	0	0	0	0	0	0	0	0	0	0	0	1	0	1	44	13	52	7	5	8	51	55	29	36	28	24	37	28	26	20	14	5	49
982	62	2	1	2	3	4	3	4	3	0	0	0	0	0	0	0	0	0	0	0	0	0	0	40	14	42	4	10	7	56	58	27	22	27	25	30	28	30	15	11		35	0	0	0	0	0	0	0
983	53	2	4	1	3	1		4	1	0	0	0	0	1	0	0	0	0	0	0	0	1	1	18	14	40	6	20	11	72	78	18	33	43	25	34	27	25	20	4	5	38
984	55	2	1	3	2	4	2	2	3	0	0	0	0	0	0	0	0	0	0	0	0	0	0	39	14	58	3	8	9	75	83	33	36	36	30	37	36	31	20	2	5	42	0	0	0	0	0	0	0
985	58	2	1	3	3	4	4	2	4	0	0	1	0	0	0	0	0	0	0	0	0	0	1	35	14	54	4	7	12	57	61	23	27	27	27	31	24	30	22	17	6	34
986	52	2	1	3	3	3	3	2	3	0	0	0	0	0	0	0	0	0	0	0	0	0	0	41	13	43	7	5	5	71	73	27	36	30	28	42	36	27	25	11	2	44	0	0	0	0	0	0	0
987	50	2	1	2	3	4	4	4	4	0	0	0	0	0	0	0	0	0	0	0	0	0	0	48	16	55	7	4	10	74	79	29	35	36	30	37	35	30	22	2	2	47
988	44	1	1	2	3	4	3	2	3	0	0	1	0	0	0	0	0	0	0	0	0	0	1	27	11	39	2	12	4	56	53	27	29	31	27	37	30	20	23	13	5	35	0	0	0	0	0	0	0
989	54	1	1	3	1	4	2	2	3	0	0	1	0	0	0	0	0	0	0	0	0	0	1	35	14	56	5	10	11									21
990	43	2	2	3	3	4	4	3	3	0	0	1	0	1	0	0	0	0	0	0	0	0	1	23	10	33	0	13	10	57	52	26	21	39	23	37	27	25	19	20	7	32	0	0	0	0	0	0	0
991	52	2	1	3	3	4	4	3	3	0	0	0	0	0	0	0	0	0	0	0	0	0	0	42	15	47	4	5	8	67	76	30	25	38	29	41	30	29	18	5	1	37	0	0	0	0	0	0	0
992	59	2	1	2	3	4	3	4	3	0	1	1	0	0	0	0	0	0	0	0	0	0	1	40	14	58	15	5	8	77	70	21	22	31	23	38	28	30	25	8	3	27
993	66	2	1	3	3	3	4	3	3	0	0	1	0	1	0	0	0	0	0	0	0	0	1	38	13	47	7	7	9	61	83	36	32	43	27	38	32	25	18	4	5	20	0	0	0	0	0	0	0
994	56	2	1	2	2	4	2	1	3	0	0	0	0	0	0	0	0	0	0	0	0	0	0	32	14	39	5	14	12	43	51	21	19	27	24	31	19	23	12	15	6	32
995	65	1	1	2	3	2		4	4	0	0	1	0	0	0	0	0	0	0	0	0	0	1	45	14	60	8	10	9	76	79	26	35	27	27	37	31	29	25	2	8	43	0	0	0	0	0	0	0
996	57	1	1	3	2	4	2	4	3	0	0	1	0	0	0	0	0	0	0	0	0	0	1	32	14	48	2	9	10	67	71	28	29	32	27	29	31	31	9	9	9	44	0	0	0	0	0	0	0
997	64	2	1	2	3	4	3	4	4	0	0	1	0	0	0	0	0	0	0	0	0	0	1	40	14	57	7	6	10	73	72	32	25	36	27	35	32	23	16	3	2	42	0	0	0	0	0	0	0
998	63	2	1	2	3	4	3	4	3	0	0	1	0	0	0	0	0	0	0	0	0	0	1	33	15	40	2	6	7	64	77	28	24	29	24	33	30	27	20	5	6	45
999	46	2	1	3	3	4	3	4	3	0	0	0	0	0	0	0	0	0	0	0	0	0	0	38	12	58	2	10	7	54	59	28	35	34	23	31	25	22	25	5	5	45	0	0	0	0	0	0	0
1000	48	1	1	3	3	4	3	2	4	0	1	0	0	0	0	0	0	0	0	0	0	0	1	37	13	57	4	12	7	57	70	30	17	38	24	26	20	21	17	7	3	39
1001	62	2	2	4	3	4	4	4	3	0	0	0	0	0	0	0	0	0	0	0	0	0	0	41	16	50	9	5	10	64	62	32	32	27	29	35	30	22	22	1	3	50	0	0	0	0	0	0	0
1002	49	2	2	2	1	4	1	1	2	0	0	0	0	0	0	0	0	0	0	0	0	0	0	35	16	58	3	6	9	62	68	27	16	37	30	29	32	23	7	0	9	16	0	0	0	0	0	0	0
1003	48	2	1	3	3	4	4	4	3	0	0	0	0	0	0	0	0	0	0	0	0	0	0	39	13	40	9	4	10	70	61	32	27	32	25	35	29	24	19	4	7	38
1004	44	2	4	6	3	4	3	4	2	0	0	0	0	0	0	0	0	0	0	0	0	0	0	29	11	50	5	13	5	41	46	17	15	33	20	32	14	20	20	24	9	26
1005	58	2	1	2	2	4	2	4	3	0	0	0	0	0	1	0	0	0	0	0	0	0	1	46	16	57	6	4	11	78	84	32	35	40	31	41	36	32	17	1	2	49	0	0	0	0	0	0	0
1006	64	2	1	2	3	2		3	3	0	0	0	0	0	0	0	0	0	0	0	0	0	0	39	14	48	4	6	5	59	67	31	32	35	26	35	28	19	21	11	8	35
1007	52	1	2	1	3	4	4	3	3	0	0	1	0	0	0	0	0	0	0	0	0	0	1	33	13	24	3	11	7	63	41	15	22	23	21	35	25	21	12	43	7	36	0	0	0	0	0	0	0
1008	56	2	1	3	3	4	3	3	2	0	0	1	0	0	0	0	0	0	0	0	0	0	1	40	15	53	11	5	10	70	74	33	35	38	29	40	35	28	21	5	6	46	0	0	0	0	0	0	0
1009	53	2	1	3	2	3	2	4	3	0	0	0	0	0	0	0	0	0	0	0	0	0	0	41	14	56	1	9	3	71	74	35	22	38	30	41	36	32	21	9	5	42	0	0	0	0	0	0	0
1010	49	1	2	1	3	4	4	2	4	0	0	0	0	0	0	0	0	0	0	0	0	0	0	47	16	59	9	5	11	57	63	26	28	33	31	32	28	30	24	5	7	39	0	0	0	0	0	0	0
1011	43	1	1	3	2	2		3	1	1	0	0	0	1	0	0	0	0	0	0	0	0	1	28	9	23	1	20	4	41	41	18	23	40	19	27	19	16	13	37	15	18	0	0	0	0	0	0	0
1012	46	1	2	6	3	4	3	4	2	0	0	0	0	0	0	0	0	0	0	0	0	0	0	44	15	56	2	6	8	46								20					0	0	0	0	0	0	0
1013	48	2	4	1	3	4	3	4	3	0	0	0	0	0	0	0	0	0	0	0	0	0	0	40	16	56	9	5	12	61	75	30	34	33	29	32	30	26	18	2	4	43
1014	43	1	1	3	2	4	2	1	3	0	0	1	0	0	0	0	0	0	0	0	0	0	1	38	15	54	10	7	8	70	73	32	34	37	26	36	31	26	15	8	7	40	0	0	0	0	0	0	0
1015	57	1	1	3	3	4	4	4	4	0	0	1	0	0	0	0	0	0	0	0	0	0	1	45	16	50	2	7	8	48	55	18	20	29	15	28	25	25	18	3	2	25	0	0	0	0	0	0	0
1016	46	2	4	1	2	4	2	2	2	0	0	0	0	0	0	0	0	0	0	0	0	0	0	35	13	50	3	13	9	48	59	25	14	24	21	31	23	21	12	5	6	31	0	0	0	0	0	0	0
1017	57	2	1	3	3	4	2	4	3	1	0	1	0	1	0	0	0	0	0	0	0	0	1	35	11	50	4	10	7	48	55	21	20	24	19	20	17	21	16	9	6	42	0	0	0	0	0	0	0
1018	43	2	1	3	2	4	2	1	2	0	0	0	0	0	0	0	0	0	0	0	0	0	0	41	16	58	11	4	7	65	74	30	27	36	25	29	29	21	17	5	2	44
1019	44	2	1	3	3	3	2	2	3	0	0	0	0	0	0	0	0	0	0	0	0	0	0	38	15	56	9	18	10	65	76	35	36	41	30	36	36	29	20	4	5	43
1020	52	2	4	3	3	3	3	2	3	0	0	0	0	0	0	0	0	0	0	0	0	1	1	36	13	51	6	7	11	40	44	22	11	32	21	38	23	23	17	4	8	19
1021	42	2	4	2	3	4	3	3	3	0	0	0	0	0	0	0	0	0	0	0	0	0	0	46	12	56	10	11	12	76	77	28	34	34	30	42	33	33	20	7	3	42	0	0	0	0	0	0	0
1022	46	2	1	3	3	4	4	2	3	0	0	0	0	0	0	0	0	0	0	0	0	0	0	31	13	50	4	8	9	59	58	24	21	28	27	38	28	29	11	8	8	32
1023	47	2	4	2	2	4	2	3	3	0	0	0	0	0	0	0	0	0	0	0	0	0	0	39	12	46	2	5	11	62	71	28	33	38	29	36	31	25	10	15	2	40
1024	53	1	1	3	3	4	4	2	4	0	0	1	0	0	0	0	0	0	1	0	0	0	1	46	16	54	6	6	9	69	82	35	33	35	30	37	35	32	23	4	5	37	0	0	0	0	0	0	0
1025	45	2	1	3	3	3	3	4	3	0	0	0	0	0	0	0	0	0	0	0	0	0	0	39	14	58	5	13	9	28	73	25	25	26	27	36	34	30	19	6	7	24	0	0	0	0	0	0	0
1026	45	1	1	3	3	4	3	4	3	0	0	0	0	0	0	0	0	0	0	0	0	0	0	41	15	36	8	6	6	68	63	31	21	41	27	27	23	18	14	19	4	27	0	0	0	0	0	0	0
1027	54	2	2	4	2	4	2	4	2	0	0	0	0	0	0	0	0	0	0	0	0	0	0	36	9	24	5	7	7	51	45	22	29	31	20	31	19	16	9	11	9	25
1028	51	2	1	3	2	4	2	1	3	0	0	0	0	0	0	0	0	0	0	0	0	0	0	39	14	48	4	17	10	59	60	21	27	35	23	26	23	27	18	16	10	35	0	0	0	0	0	0	0
1029	42	2	1	3	3	4	3	3	3	0	0	0	0	0	0	0	0	0	0	0	0	0	0	48	12	49	1	8	10	64	60	33	25	36	27	37	31	24	18	7	5	32	0	0	0	0	0	0	0
1030	55	2	4	6	2	4	2	4	2	1	0	0	0	0	0	0	0	0	0	0	0	0	1	41	11	53	5	12	10	65	59	23	34	40	25	37	28	23	18	22	7	40	0	0	0	0	0	0	0
1031	57	2	1	2	2	4	2	2	3	0	0	0	0	0	0	0	0	0	0	0	0	0	0	40	13	60	6	10	8	61	70	32	26	36	27	35	33	22	13	2	5	49	0	0	0	0	0	0	0
1032	45	1	1	3	3	4	3	2	3	0	0	0	1	0	0	0	0	0	0	0	0	0	1	36	16	57	2	10	6	58	71	21	29	24	22	22	22	24	18	6	4	24	0	0	0	0	0	0	0
1033	42	2	1	3	2	3	2	4	3	0	0	0	0	0	0	0	0	0	0	0	0	0	0	35	12	57	1	7	12	49	67	14	23	39	26	33	21	27	15	2	5	28	0	0	0	0	0	0	0
1034	53	2	1	2	3	4	2	3	3	0	0	0	0	1	0	0	0	0	0	0	0	0	1	35	12	59	5	18	8	79	80	31	33	40	31	39	35	32	21	13	10	43	0	0	0	0	0	0	0
1035	64	1	1	2	2	4	2	2	3	0	0	0	0	0	0	0	0	0	0	0	0	0	0	42	15	60	12	5	9	64	64	29	15	42	24	36	34	28	16	3	4	17
1036	43	2	4	3	3	4	2	3	3	0	0	0	0	0	0	0	0	0	0	0	0	0	0	43	14	53	7	7	8	64	72	31	30	37	30	35	32	25			7	43
1037	64	2	1	3	2	3	2	2	2	0	1	0	0	0	0	0	0	0	1	0	0	0	1	37	16	51	3	5	9	61	85	31	31	37	29	40	36	28	14	6	2	42	0	0	0	0	0	0	0
1038	49	2	2	4	3	4	3	4	3	0	0	0	0	0	0	0	0	0	0	0	0	0	0	45	15	57	8	4	8	71	69	33	36	39	31	42	33	33	20	2	1	44	0	0	0	0	0	0	0
1039	63	1	4	1	1	4	2	3	2	0	0	1	0	0	0	0	0	0	0	0	0	1	1	35	15	60	4	5	10									24
1040	49	2	1	3	3	3	2	2	3	0	0	0	0	0	0	0	0	0	0	0	0	0	0	33	12	51	4	13	9	51	64	27	29	31	24	41	14	21
1041	49	2	1	3	3	4	3	2	3	0	0	0	0	0	0	0	0	0	0	0	0	0	0	37	15	59	0	6	4	76	77	36	36	41	26	40	36	32	18	2	4	44	0	0	0	0	0	0	0
1042	52	1	1	3	3	4	3	3	3	0	0	0	0	0	0	0	0	0	0	0	0	0	0	42	16	60	10	5	11	71	80	34	34	39	30	31	36	28	18	1	4	35
1043	53	2	1	3	2	4	2	4	4	1	0	0	0	0	0	0	0	0	0	0	0	0	1	39	16	53	7	6	10	59	66	30	17	34	21	31	30	24	16	3	5	26	0	0	0	0	0	0	0
1044	66	2	2	1	3	3	3	4	2	0	0	0	0	1	0	0	0	0	0	0	0	0	1	40	15	59	7	6	13	71	69	31	30	39	29	37	35	32	22	4	4	36	0	0	0	0	0	0	0
1045	52	2	4	4	1	4	1	2	2	0	1	0	0	1	0	0	0	0	0	1	0	0	1	33	5	36	9	16	8	49	37	16	15	30	21	24	19	18	6	19	10	20	0	0	0	0	0	0	0
1046	45	1	1	3	3	4	3	3	3	0	0	0	0	0	0	0	0	0	0	0	0	1	1	40	16	51	10	4	12	62	74	28	24	34	27	35	33	28	21	4	3	41	0	0	0	0	0	0	0
1047	54	2	1	3	2	3	2	3	2	0	0	0	0	0	0	0	0	0	0	0	0	0	0	42	14	55	0	8	9	58	73	24	35	36	25	27	26	18	8	2	3	29	0	0	0	0	0	0	0
1048	57	2	4	6	3	4	4	4	2	1	0	0	0	0	0	0	0	0	0	1	0	0	1	44	13	53	1	20	7	63	53	25	27	23	24	33	27	22	20	20	9	39	0	0	0	0	0	0	0
1049	55	2	1	3	2	1		3	3	0	0	0	0	0	0	0	0	0	0	0	0	0	0	40	14	53	12	11	6	48	46	20	24	31	22	20	15	21	15	13	5	24	0	0	0	0	0	0	0
1050	62	1	1	2	2	1		2	3	0	0	0	0	0	0	0	0	0	0	0	0	0	0	45	14	57	15	6	9	80	79	34	36	31	29	38	36	32	19	0	1	43	0	0	0	0	0	0	0
1051	62	2	2	4	3	1		3	1	0	0	0	0	0	0	0	0	0	0	0	0	0	0	50	16	60	9	5	9	80	81	34	29	39	31	32	36	32	24	1	2	44
1052	50	2	1	3	3	3	2	3	2	0	0	0	0	0	0	0	0	0	0	0	0	0	0	28	10	36	4	24	8	59	49	22	14	29	24	37	28	27	20	22	14	17
1053	60	2	1	3	2	4	2	4	3	0	0	1	0	0	0	0	0	0	1	0	0	0	1	32	16	56	2	18	8	53	76	29	30	29	28	36	33	34	22	1	6	25	0	0	0	0	0	0	0
1054	53	1	1	3	3	4	4	2	4	0	0	0	0	0	0	0	0	0	0	0	0	0	0	35	15	44	6	5	9	50	67	21	19	32	21	25	21	26	16	6	5	17	0	0	0	0	0	0	0
1055	50	1	4	1	3	4	3	2	4	0	0	1	0	0	0	0	0	0	0	0	0	0	1	33	13	31	1	10	7	42	54	19	18	34	23	36	20	20	13	6	7	24
1056	48	2	2	4	2	4	2	2	2	0	0	1	0	0	0	0	0	0	0	0	0	0	1	43	14	45	15	8	10	57	54	24	30	36	29	40	24	25	19	10	10	40	0	0	0	0	0	0	0
1057	45	1	1	3	3	4	4	3	3	0	0	0	0	0	0	0	0	0	0	0	0	0	0	41	14	58	8	10	12	63	70	29	28	33	25	31	29	32	18	7	6	47
1058	50	2	1	3	3	4	3	1	3	0	0	0	0	0	0	0	0	0	0	0	0	0	0	39	12	55	1	7	10	54	50	30	29	30	22	37	31	28	20	9	5	36	0	0	0	0	0	0	0
1059	44	2	1	3	3	4	3	2	3	0	0	0	0	1	0	0	0	0	0	0	0	0	1	46	14	51	16	20	11	65	49	27	32	37	30	41	33	32	21	15	9	41
1060	63	2	1	2	3	2		1	2	0	1	0	0	0	0	0	0	0	1	0	0	0	1	35	13	29	5	20	8	63	52	23	36	37	24	27	27	20	21	19	12	20
1061	44	1	2	2	2	3	2	2	3	0	0	1	0	0	0	0	0	0	0	0	0	0	1	33	8	60	11	17	7	56	52	28	20	37	27	31	32	11	8	31	15	18
1062	58	2	3	4	3	3	3	4	2	0	0	0	0	0	0	0	0	0	0	0	0	0	0	35	13	54	5	6	8	52	83	31	32	37	29	42	30	24			2	38
1063	51	2	1	3	1	1		2	3	0	0	0	0	0	0	0	0	0	0	0	0	0	0	34	12	47	10	7	11	48	57	21	21	26	21	34	24	23	14	10	5	28	0	0	0	0	0	0	0
1064	45	2	4	1	3	3	2	3	1	0	1	0	0	1	0	0	0	0	0	0	0	0	1	42	16	60	4	7	8	62	63	24	23	31	24	31	24	27	21	20	13	30	0	0	0	0	0	0	0
1065	47	2	1	3	3	4	4	2	3	0	0	0	0	0	0	0	0	0	0	0	0	0	0	44	14	58	2	10	8	70	55	33	28	33	26	42	35	28	24	10	7	41	0	0	0	0	0	0	0
1066	55	2	1	3	3	4	4	2	3	0	0	0	0	0	0	0	0	0	0	0	0	0	0	41	15	52	9	9	8	72	69	31	29	39	27	30	34	28	22	4	6	40	0	0	0	0	0	0	0
1067	62	1	4	2	3	3	4	3	3	1	0	1	1	0	0	0	0	0	1	1	0	0	1	39	16	55	4	7	8									29
1068	59	1	1	3	3	4	3	3	3	0	0	0	0	0	0	0	0	0	0	0	0	0	0	42	15	58	5	4	11	64	65	27	25	33	27	42	30	22	19	3	1	29
1069	44	2	1	3	2	4	2	2	3	0	0	0	0	0	0	0	0	0	0	0	0	0	0	38	12	48	7	8	8	64	62	22	23	33	24	38	28	23	9	9	7	38
1070	55	2	1	3	1	3	1	4	1	0	0	0	0	0	0	0	0	0	0	0	0	0	0	34	12	54	1	7	6	61	54	28	35	24	22	34	33	29	9	17	3	26	0	0	0	0	0	0	0
1071	56	2	1	3	2	1		3	2	0	0	0	0	0	0	0	0	0	0	0	0	1	1	31	15	54	3	8	10	58	69	27	19	38	25	40	31	26	21	0	6	28	0	0	0	0	0	0	0
1072	64	2	1	2	3	2		2	4	0	0	1	0	1	0	0	0	0	0	0	0	1	1	31	16	50	6	4	8	77	79	36	27	36	31	32	36	30	14	1	2	42	0	0	0	0	0	0	0
1073	51	1	1	2	3	4	4	4	3	0	0	1	0	0	0	0	0	0	0	0	0	0	1	35	14	57	10	6	10	56	59	25	21	32	24	38	30	32	18	1	10	36	0	0	0	0	0	0	0
1074	62	2	1	2	3	4	3	4	3	0	0	0	0	0	0	0	0	0	0	0	0	0	0	42	16	60	7	5	10	68	73	33	14	34	27	35	36	28	14	4	4	25	0	0	0	0	0	0	0
1075	55	2	2	2	2	4	2	4	2	1	0	0	0	1	0	0	0	0	0	0	0	0	1	31	14	45	2	15	7	66	63	25	28	28	26	40	28	27	14	18	7	29
1076	51	2	3	1	3	4	3	2	2	0	0	0	0	0	0	0	0	0	0	0	0	0	0	39	14	59	8	4	10	76	78	30	34	43	30	42	35	24	17	0	3	43
1077	61	2	1	3	2	4	2	2	3	0	0	0	0	1	0	0	0	0	0	0	0	1	1	34	14	60	4	14	9	66	81	30	24	42	29	39	31	20	15	15	12	39	0	0	0	0	0	0	0
1078	55	2	4	1	1	4	2	3	1	0	0	1	0	1	0	0	0	0	0	1	0	0	1	24	10	25	4	16	8	40	38	13	12	23	20	23	16	20	13	36	6	29	0	0	0	0	0	0	0
1079	60	1	1	2	1	4	2	3	2	1	0	0	0	0	0	0	0	0	0	1	0	0	1	38	14	60	2	6	8	61	69	34	35	40	30	40	34	28	16	5	1	32
1080	56	1	1	2	2	4	2	4	3	0	0	0	0	0	0	0	0	0	0	0	0	0	0	30	13	55	7	12	11	62	60	26	29	35	26	35	25	26	20	3	5	40	0	0	0	0	0	0	0
1081	54	2	2	4	3	4	4	2	2	0	0	0	0	0	0	0	0	0	0	0	0	0	0	35	12	40	8	8	8	50	51	23	22	24	23	30	23	25	15	16	5	35	0	0	0	0	0	0	0
1082	51	2	4	5	1	4	2	4	3	0	0	0	0	0	0	0	0	0	0	0	0	0	0	39	16	54	2	8	10	60	62	26	33	35	22	29	33	31	18	12	10	43
1083	42	1	1	3	3	3	2	1	3	0	0	0	0	0	0	0	0	0	0	0	0	0	0	38	16	57	0	9	10	63	80	30	18	35	29	42	34	30	16	6	6	32	0	0	0	0	0	0	0
1084	47	2	1	2	3	4	2	2	3	0	0	0	0	0	0	0	0	0	0	0	0	0	0	31	14	43	7	6	9	49	41	17	19	22	17	27	14	19	13	17	5	32	0	0	0	0	0	0	0
1085	60	2	1	3	3	4	2	2	4	0	0	0	0	0	0	0	0	0	0	0	0	0	0	34	12	46	3	8	8	64								27
1086	50	2	1	3	2	1		1	3	0	0	0	0	0	0	0	0	0	0	0	0	0	0	38	16	29	6	12	8	20								26
1087	65	1	4	3	2	2		3	3	0	0	0	0	0	0	0	0	0	0	0	0	0	0	45	16	60	5	5	12	77	86	35	36	36	30	41	35	28	18	0	1	40	0	0	0	0	0	0	0
1088	53	2	2	4	2	4	2	2	3	0	0	1	0	0	0	0	0	0	0	0	0	0	1	45	14	56	6	6	8	75	77	36	36	43	31	39	36	32	17	8	5	48	0	0	0	0	0	0	0
1089	45	1	2	6	3	4	2	2	3	0	0	0	0	0	0	0	0	0	0	0	0	0	0	42	14	55	4	10	7	68	75	34	31	34	30	34	35	28	14	9	6	36
1090	45	2	2	4	3	4	3	4	3	0	0	0	0	0	0	0	0	0	0	0	0	0	0	42	16	48	4	9	7	58	76	29	29	35	28	33	29	29	18	5	4	46
1091	64	2	1	2	2	4	2	2	3	0	0	0	0	0	0	0	0	0	0	0	0	0	0	44	16	46	14	11	10	80	84	36	35	42	29	38	34	28	11	2	5	43
1092	46	2	2	4	3	4	3	2	2	0	0	0	0	0	0	0	0	0	0	0	0	0	0	41	15	55	5	10	9	65	66	30	30	38	29	42	31	26	17	9	7	33	0	0	0	0	0	0	0
1093	44	1	4	2	3	4	3	4	1	0	0	0	0	0	0	0	0	0	0	0	0	0	0	33	14	48	5	4	9									25
1094	64	2	1	3	2	2		4	3	0	0	0	0	0	0	0	0	0	0	0	0	0	0	41	15	58	2	6	11	54	63	26	34	36	25	32	28	23	15	7	4	42	0	0	0	0	0	0	0
1095	45	2	2	4	2	4	2	4	2	0	0	0	0	0	0	0	0	0	0	0	0	0	0	26	12	26	1	19	9	59	67	33	35	31	26	41	30	24	20	7	7	33
1096	61	1	1	2	3	4	4	3	4	0	0	0	0	0	1	1	0	0	0	0	0	0	1	45	16	60	9	5	8	60	86	32	30	43	32	37	32	30	15	0	4	39	0	0	0	0	0	0	0
1097	44	1	4	2	3	4	2	4	4	0	0	0	0	1	0	0	0	0	0	0	0	0	1	36	13	54	5	10	9	61	73	26	29	37	29	40	35	19			7	40
1098	64	1	1	2	3	2		1	3	0	0	0	0	0	0	0	0	0	0	0	0	0	0	42	14	45	12	6	8	57	49	25	23	27	22	28	27	23	13	10	3	39	0	0	0	0	0	0	0
1099	57	2	4	1	3	4	3	4	2	1	0	0	0	0	0	0	0	0	0	0	0	0	1	41	14	43	6	7	8	58	56	35	22	42	31	30	26	19	23	0	10	26	0	0	0	0	0	0	0
1100	63	1	1	2	3	2		4	3	0	0	0	0	0	0	0	0	0	0	0	0	0	0	41	15	56	3	7	9	48	63	24	25	33	23	31	22	26	16	3	4	36	0	0	0	0	0	0	0
1101	53	2	1	2	1	4	4	4	3	0	0	0	0	0	0	0	0	0	0	0	0	0	0	36	16	58	3	5	11	79	84	36	34	44	26	38	36	32	13	0	2	37	0	0	0	0	0	0	0
1102	51	2	2	2	3	4	3	4	3	0	0	0	0	0	0	0	0	0	0	0	0	0	0	33	13	49	3	6	10	54	61	26	28	32	26	39	22	26	19	4	5	36
1103	50	2	4	5	1	4	2	4	3	1	0	0	0	0	1	0	0	0	0	0	0	1	1	33	14	41	0	21	4	41	53	21	34	34	24	38	17	14	13	10	7	40
1104	45	2	4	3	3	4	4	4	3	0	0	1	0	0	0	0	0	0	0	0	0	0	1	44	14	54	3	6	7	63	69	32	35	38	25	41	33	27	20	3	2	40
1105	49	2	1	3	3	4	3	2	4	0	0	1	0	0	0	0	0	0	0	0	0	0	1	35	10	26	2	17	9	50	37	21	19	19	19	38	27	19	15	25	6	40
1106	47	1	1	3	3	4	3	3	3	0	0	0	0	0	0	0	0	0	0	0	0	0	0	42	16	57	1	6	10	65	69	31	28	35	27	39	32	33	16	0	3	38
1107	60	2	1	2	1	3	1	2	1	1	0	0	0	0	0	0	0	0	0	0	0	0	1	39	14	52	3	5	6	53	65	20	19	37	23	27	27	29	8	2	5	39
1108	66	2	4	1	2	4	2	3	2	0	0	0	0	0	0	0	0	0	0	0	0	0	0	38	14	53	5	8	10	71	62	32	32	37	29	31	36	23	16	1	6	42	0	0	0	0	0	0	0
1109	51	1	4	1	3	4	3	2	2	0	0	0	0	0	0	0	0	0	0	0	0	0	0	40	15	56	9	5	5	54	73	27	33	35	27	37	24	22	14	8	2	33	0	0	0	0	0	0	0
1110	51	2	2	4	2	4	1	4	2	0	0	0	0	1	0	0	0	0	0	0	0	0	1	34	10	39	5	7	9	61	69	29	18	40	26	36	32	26	10	6	6	27
1111	46	2	4	2	3	4	3	4	3	0	0	0	0	1	0	0	0	0	0	0	0	0	1	30	8	21	7	19	9	48	57	22	21	42	25	32	22	16	18	3	7	38	0	0	0	0	0	0	0
1112	46	2	1	3	2	4	2	1	3	0	0	0	0	0	0	0	0	0	0	0	0	0	0	44	16	56	11	6	8	61	62	34	28	40	30	40	30	22	6	3	4	26	0	0	0	0	0	0	0
1113	47	2	4	2	3	4	3	2	3	0	1	0	0	0	0	0	0	0	0	0	0	0	1	44	14	58	10	7	6	45	68	26	33	40	18	35	22	25	16	8	8	27	0	0	0	0	0	0	0
1114	66	1	1	3	3	2		4	4	0	0	1	0	0	0	0	0	0	0	0	0	0	1	42	16	60	8	10	9	56	82	28	27	35	28	27	30	22	15	0	4	31	0	0	0	0	0	0	0
1115	44	1	4	3	3	4	4	4	4	0	0	1	0	1	0	0	0	0	0	0	0	0	1	39	14	38	7	9	8	71	78	33	29	45	31	32	34	29	14	10	7	38
1116	64	2	1	3	3	2		4	4	0	0	0	0	0	0	0	0	0	0	0	0	0	0	39	15	52	5	15	10	59	64	26	30	30	23	31	26	23	20	2	10	35
1117	44	2	4	1	3	4	2	3	2	0	0	0	0	0	0	0	0	0	0	0	0	0	0	46	15	59	10	6	10	52	61	24	22	30	23	36	25	24	17	8	5	34	0	0	0	0	0	0	0
1118	66	1	2	4	3	3	4	3	4	0	0	1	0	0	0	0	0	0	0	0	0	0	1				7	8	10	64	77	32	36	39	33	37	32	30	15	3	6	52
1119	55	2	1	3	2	4	2	4	3	1	0	0	0	0	0	0	0	0	0	0	0	0	1	34	16	52	3	6	4	60	60	29	36	33	29	34	31	25	14	6	5	47
1120	58	2	2	4	2	1		4	2	0	0	1	0	1	0	0	0	0	0	0	0	0	1	30	15	52	4	5	9	74	68	33	22	39	31	35	32	28	15	5	2	39	0	0	0	0	0	0	0
1121	48	2	4	1	3	4	3	3	2	0	0	0	0	0	0	0	0	0	0	0	0	0	0	43	16	54			7	64	70	34	36	31	27	41	29	16	20	0	3	37	0	0	0	0	0	0	0
1122	48	1	4	1	2	3	2	3	3	0	0	0	0	0	0	0	0	0	0	0	0	0	0	35	11	48	9	10	7	72	53	30	25	37	25	39	35	30	18	8	10	43	0	0	0	0	0	0	0
1123	57	2	1	3	3	3	3	3	4	0	0	0	0	0	0	0	0	0	0	0	0	0	0	44	16	53	14	5	10	68	77	35	36	39	31	40	34	29	25	3	6	54
1124	48	1	1	3	3	4	2	4	3	1	0	1	0	0	0	0	0	0	0	0	0	0	1	31	10	33	1	10	9	53	39	12	13	23	23	25	16	16	13	30	7	24
1125	47	2	2	4	3	4	3	3	2	0	0	0	0	0	0	0	0	0	0	0	0	0	0	42	12	52	5	8	6	59	60	22	26	28	18	35	24	24	16	5	5	32	0	0	0	0	0	0	0
1126	52	2	1	3	3	4	4	3	3	0	0	0	0	1	0	0	0	0	0	0	0	0	1	39	15	47	6	12	7	62	56	27	28	25	24	31	27	27	23	7	9	29	0	0	0	0	0	0	0
1127	49	2	4	2	2	4	2	4	3	0	0	0	0	0	0	0	0	0	0	0	0	0	0	37	15	55	3	5	4	48	54	29	19	35	20	27	8	12	10	3	3	29
1128	57	2	1	3	3	4	3	4	3	0	0	0	0	0	0	0	0	0	0	0	0	1	1	36	15	46	4	9	10	60	73	32	19	33	29	38	29	27	19	6	8	21
1129	47	1	1	3	3	4	4	2	3	0	0	0	0	0	0	0	0	0	0	0	0	0	0	38	15	49	4	4	9	57	63							24
1130	47	2	2	4	2	4	2	3	3	0	0	0	0	0	0	0	0	0	0	0	0	0	0	46	12	54	3	7	6	65	75	32	36	37	30	38	36	27	19	10	9	50	0	0	0	0	0	0	0
1131	42	2	2	1	3	4	3	1	3	0	0	0	0	0	0	0	0	0	0	0	0	0	0	29	11	58	3	9	5	63	63	28	31	32	26	36	30	29	16	4	6	41	0	0	0	0	0	0	0
1132	54	2	1	2	1	4	2	1	1	0	0	0	0	0	0	0	0	0	0	0	0	0	0	26	6	53	3	10	6	55	56	25	31	22	20	30	25	15	14	13	8	36	0	0	0	0	0	0	0
1133	57	1	4	1	3	4	3	3	2	0	0	1	0	0	0	0	0	0	0	0	0	0	1	35	15	51	7	8	11	67	65	30	26	36	29	39	32	29	18	4	8	43	0	0	0	0	0	0	0
1134	51	2	2	4	3	4	4	4	3	0	0	0	0	0	0	0	0	0	0	0	0	0	0	39	13	57	8	8	7	54	44	28	32	26	22	31	26	27	23	0	5	45
1135	54	2	1	2	2	3	1	2	2	0	0	0	0	0	0	0	0	0	0	0	0	1	1	40	16	57	6	4	7									21
1136	66	1	1	2	3	4	3	1	3	0	0	0	0	0	0	0	0	0	0	0	0	0	0	45	14	58	6	9	9	59	75	31	25	42	31	32	31	23	14	5	4	11	0	0	0	0	0	0	0
1137	44	2	1	3	3	4	4	4	3	0	0	0	0	0	0	0	0	0	0	0	0	0	0	32	12	37	3	13	8	41	41	15	27	26	20	27	13	15	16	15	9	38
1138	49	2	1	2	3	1		4	4	0	0	0	0	0	0	0	0	0	0	0	0	0	0	45	15	55	7	7	11	61	72	30	28	35	29	38	26	22	19	2	4	38	0	0	0	0	0	0	0
1139	42	1	4	1	3	4	4	3	3	0	0	0	0	0	0	0	0	0	0	0	0	0	0	50	16	60	8	5	11	80	84	33	25	39	30	38	36	28	17	0	3	40	0	0	0	0	0	0	0
1140	56	2	1	2	3	4	2	4	3	0	0	0	0	0	0	0	0	0	0	0	0	0	0	41	13	44	0	6	8									21
1141	44	2	4	1	3	4	3	4	2	0	0	0	0	0	0	0	0	0	0	0	0	0	0	36	13	58	1	5	8	56	68	25	32	39	29	34	25	25	15	9	5	39
1142	61	2	1	2	3	4	3	1	3	0	0	0	0	0	0	0	0	0	1	0	0	1	1	28	10	30	5	16	12	68	56	24	23	30	28	31	36	30	16	13	12	42
1143	53	2	1	2	3	4	2	2	3	0	1	1	0	1	0	0	0	0	0	0	0	0	1	31	14	48	5	12	11	58	62	27	23	33	29	35	23	22	18	13	8	26	0	0	0	0	0	0	0
1144	61	2	4	5	2	4	4	2	3	0	0	1	0	0	0	0	0	0	0	0	0	0	1	36	16	55	5	4	7	55	66	18	36	29	32	42	26	29	19	8	4	50	0	0	0	0	0	0	0
1145	47	2	1	3	3	4	3	4	3	0	0	0	0	0	0	0	0	0	0	0	0	0	0	37	12	44	5	8	8									16
1146	56	2	2	4	2	3	2	2	2	0	0	1	0	0	0	0	0	0	0	0	0	0	1	44	13	41	2	8	8	64	63	25	33	36	24	34	28	25	16	16	5	51
1147	46	2	1	3	3	2		3	3	0	0	0	0	0	0	0	0	0	0	0	0	0	0	23	12	55	3	6	9	60	64	31	36	39	30	37	32	28	14	16	4	32
1148	51	2	1	3	3	4	3	4	3	0	0	0	0	0	0	0	0	0	0	0	0	0	0	43	16	58	5	8	11	67	67	31	36	36	29	33	33	30	27	9	8	54	0	0	0	0	0	0	0
1149	55	2	2	4	3	4	4	4	1	0	0	0	0	0	0	0	0	0	0	0	0	0	0	40	13	57	3	6	8	62	66	20	28	32	25	38	23	19	21	7	5	36	0	0	0	0	0	0	0
1150	52	2	1	2	3	4	3	3	3	0	0	1	0	0	0	0	0	0	0	0	0	0	1	39	13	54	9	16	8	67	67	29	36	31	26	33	29	21	22	1	6	43
1151	49	2	2	4	3	3	4	3	2	0	0	0	0	0	0	0	0	0	0	0	0	0	0				4	4	12	58	74	30	25	37	30	33	24	25	20	6	3	36	0	0	0	0	0	0	0
1152	55	2	2	4	2	4	2	3	2	1	0	0	0	0	0	0	0	0	0	0	0	0	1	26	10	33	2	19	6	50	55	22	22	37	24	37	21	27	19	35	15	35	0	0	0	0	0	0	0
1153	46	1	1	3	2	4	2	2	3	0	0	0	0	1	0	0	0	0	0	0	0	0	1	39	13	55	0	9	7	55	71	25	23	32	27	28	25	17	12	8	8	20	0	0	0	0	0	0	0
1154	50	1	1	2	2	4	2	3	2	0	0	1	0	0	0	0	0	0	0	0	0	0	1	35	13	47	2	7	5	57	64	29	30	29	22	28	22	20	18	3	4	39
1155	46	2	1	3	3	4	3	2	3	0	0	0	0	1	0	0	0	0	0	0	0	0	1	31	13	31	5	11	6	55	53	29	29	38	26	38	19	20	20	11	7	27	0	0	0	0	0	0	0
1156	57	2	4	5	3	3	3	2	2	0	0	0	0	0	0	0	0	0	0	0	0	0	0	43	12	53	2	9	8	73	71	22	29	27	28	42	28	27	22	11	4	35
1157	54	1	4	1	3	4	4	3	3	0	0	1	0	0	0	0	0	0	0	0	0	0	1	44	15	59	6	5	7	65	70	31	28	34	27	33	32	31	15	1	5	43	0	0	0	0	0	0	0
1158	43	2	1	2	2	4	2	4	2	0	0	0	0	0	0	0	0	0	0	0	0	0	0	38	16	60	4	6	9	57	70	31	22	33	23	35	30	22	15	3	7	24	0	0	0	0	0	0	0
1159	60	1	1	3	2	4	4	2	4	0	0	1	0	0	0	0	0	0	0	0	0	0	1	40	15	53	6	7	12	56								25
1160	53	2	4	2	3	4	4	3	3	0	0	0	0	0	0	0	0	0	0	0	0	0	0	40	11	16	4	19	10	53	56	16	30	36	24	28	18	17	15	5	11	44	0	0	0	0	0	0	0
1161	57	1	4	1	3	4	3	4	2	0	0	0	0	0	0	0	0	0	0	0	0	0	0	42	16	56	6	5	10	66	82	32	36	42	31	41	35	29	19	5	4	45	0	0	0	0	0	0	0
1162	45	2	4	1	3	4	4	4	2	0	0	0	0	0	0	0	0	0	0	0	0	0	0	30	14	46	10	14	10	58	68	28	33	45	28	39	24	20
1163	65	2	1	2	2	1		3	3	0	0	0	0	0	0	0	0	0	0	0	0	0	0	39	16	45	4	5	10	63	53	27	27	31	26	27	28	22	17	0	1	36	0	0	0	0	0	0	0
1164	46	1	2	1	3	4	3	2	3	0	0	1	0	0	0	0	0	0	0	0	0	0	1	41	13	55	13	8										19
1165	43	2	4	1	3	4	3	3	2	0	0	0	0	0	0	0	0	0	0	0	0	0	0	39	12	47	5	18										23
1166	44	2	1	3	3	3	2	4	3	0	0	0	0	0	0	0	0	0	0	0	0	0	0	41	14	56	9	9										28
1167	52	2	2	1	2	4	2	1	2	1	0	0	0	0	0	0	0	0	0	0	0	0	1	35	12	41	0	11		75	62	32	36	39	27	41	36	28
1168	66	1	1	2	1	2		4	2	0	0	0	0	0	0	0	0	0	0	0	0	0	0	36	14	52	5	4										17
1169	64	1	1	2	3	2		3	2	1	1	1	1	0	0	0	0	0	1	0	0	0	1	39	16	60	3	10		61	68	26	22	38	28	28	26	28			10	27
1170	45	1	4	3	3	4	4	4	3	0	0	0	0	0	0	0	0	0	0	1	0	0	1	36	14	38	3	8										27
1171	53	2	1	3	2	4	2	4	4	0	0	0	0	0	0	0	0	0	0	0	0	0	0	34	12	44	8	14										21
1172	64	2	1	2	2	4	2	1	2	0	0	0	0	0	0	0	0	0	0	0	1	0	1	39	14	48	4	5										21
1173	59	2	1	3	3	4	3	4	4	0	0	0	0	0	0	0	0	0	0	0	0	0	0	42	15	53	5	4										26
1174	53	1	1	2	3	4	3	4	3	0	0	0	0	0	0	0	0	0	0	0	0	1	1	33	12	41	1	10										24
1175	60	2	4	1	2	4	2	4	2	0	0	1	0	0	0	0	0	0	0	0	0	0	1	42	16	60	2	9										33
1176	46	2	1	3	2	3	1	3	4	0	0	0	0	0	0	0	0	0	0	0	0	0	0	39	12	51	6	7										29
1177	53	2	1	3	3	4	2	4	3	0	0	0	0	0	0	0	0	0	0	0	0	0	0	36	12	46	7	11										21
1178	44	2	4	1	3	4	2	4	2	0	0	0	0	1	0	0	0	0	0	0	0	0	1	32	12	34	1	21										28
1179	44	2	4	2	2	3	2	3	3	0	1	0	0	0	0	0	0	0	0	0	0	0	1	40	15	51	7	16										29
1180	43	2	2	3	1	4	2	2	3	0	0	0	0	0	0	0	0	0	0	0	0	0	0	41	15	51	7	5										25
1181	51	2	1	3	2	4	2	4	3	0	0	0	0	0	0	0	0	0	0	0	0	0	0	39	13	51	6	5										20
1182	47	2	4	3	3	4	3	3	2	0	0	0	0	0	0	0	0	0	0	0	0	0	0	42	14	58	7	5										31
1183	47	2	1	2	3	4	3	3	3	0	0	0	0	0	0	0	0	0	0	0	0	0	0	37	14	52	0	7										28
1184	65	2	1	2	1	2		4	4	0	0	0	0	0	0	0	0	0	0	0	0	0	0	45	16	58	13	5										27
1185	58	2	2	1	3	3	4	4	3	0	0	0	0	1	0	0	0	0	0	0	0	0	1	42	15	60	8	6										22
1186	59	2	2	4	3	4	2	4	1	0	0	0	0	0	0	0	0	0	0	0	0	0	0	37	13	57	4	5										32
1187	44	2	1	3	3	4	4	2	3	0	0	0	0	0	0	0	0	0	0	0	0	0	0	36	9	47	1	15										26
1188	48	1	1	3	3	4	3	4	3	0	0	0	0	1	0	0	0	0	0	0	0	0	1	42	12	44	2	8										27
1189	47	2	4	3	3	4	2	4	3	0	0	0	0	0	0	0	0	0	0	0	0	0	0	37	15	57	2	9										26
1190	63	1	1	3	2	1		4	2	0	0	0	1	0	0	0	0	0	0	1	0	1	1	37	15	45	5	9										26
1191	53	2	1	3	3	4	4	3	2	0	0	0	0	0	0	0	0	0	0	0	0	0	0	38	13	42	9	14										31
1192	63	2	4	1	3	4	2	4	2	0	0	0	0	0	0	0	0	0	0	1	0	0	1	34	15	47	6	8										24
1193	66	2	1	2	2	1		2	2	0	0	1	0	1	0	0	0	0	0	0	0	0	1	29	15	59	5	12										21
1194	51	1	1	3	2	2		4	3	1	0	1	0	0	0	0	0	0	0	0	1	1	1	37	16	52	9	4										22
1195	47	1	1	3	3	4	3	4	3	0	0	0	0	0	0	0	0	0	0	0	0	0	0	42	15	60	6	4										28
1196	50	2	1	3	3	4	4	3	2	0	0	0	0	0	0	0	0	0	0	0	0	0	0	34	16	58	1	6										17					0	0	0	0	0	0	0
1197	45	2	1	3	3	4	4	4	3	0	0	0	0	0	0	0	0	0	0	0	0	0	0	36	12	54	5	8										28			5	39
1198	59	2	1	3	3	1		3	3	0	0	1	0	0	0	0	0	0	0	0	0	0	1	40	16	45	5	12										25
1199	50	2	2	4	3	3	2	3	1	1	0	0	0	1	0	0	0	0	0	1	0	0	1	24	6	37	6	24										24
1200	65	2	2	1	2	2		3	2	0	0	1	0	0	0	0	0	0	0	0	0	0	1	37	16	37	5	6	8	63	67	27	35	38	29	33	32	30	18	14	8	43	0	1	0	0	0	0	0
1201	63	1	1	3	3	4	2	3	3	1	0	1	0	1	0	0	0	0	0	1	0	0	1	36	14	49	2	5	11	63	62	20	27	37	22	39	23	22	16	15	2	15	0	0	0	0	0	0	0
1202	44	1	1	3	3	4	4	1	3	0	0	0	0	0	0	0	0	0	0	0	0	0	0	40	13	59	10	8	7	63	59	26	25	31	27	35	30	30	18	7	7	32	0	0	0	0	0	0	0
1203	59	1	1	3	3	4	4	4	3	0	0	0	0	0	0	0	0	0	0	0	0	0	0	39	13	53	9	8	10	63	79	31	35	37	29	42	36	30	23	10	4	36
1204	62	2	3	1	3	4	3	1	3	0	0	0	0	0	0	0	0	0	0	0	0	0	0	44	16	60	11	6	12	67	67	29	27	37	26	33	30	30	18	2	4	38	0	0	0	0	0	0	0
1205	65	2	3	4	3	4	3	2	2	0	0	1	0	0	1	0	0	0	0	0	0	0	1	32	13	51	8	16	11	74	78	29	36	35	30	42	35	25
1206	42	1	4	2	3	4	4	4	3	0	0	0	0	0	0	0	0	0	0	0	0	0	0	34	13	53			7	61	67	26	28	35	29	38	30	24	19	14	7	37	0	0	0	0	0	0	0
1207	43	1	4	1	3	3	3	1	2	0	0	0	0	0	0	0	0	0	0	0	0	0	0	45	16	56	14	7	12	62	75	34	36	47	31	42	35	28	15	1	4	37	0	0	0	0	0	0	0
1208	48	1	1	3	3	4	4	2	3	0	0	0	0	0	0	0	0	0	0	0	0	0	0	40	12	38	6	7	10	54	52	23	24	29	20	30	18	21	20	11	6	33
1209	52	2	1	2	3	1		4	3	0	0	0	0	0	0	0	0	0	0	0	0	0	0	35	13	60	6	6	7	62	60	21	27	33	26	29	28	26	21	14	5	33	0	0	0	0	0	0	0
1210	46	2	1	3	3	4	2	2	3	0	0	0	0	0	0	0	0	0	0	0	0	0	0	44	10	38	8	8	8	46	50	20	20	32	20	28	22	24	11	16	8	29
1211	53	1	1	3	2	4	2	2	3	0	0	1	0	0	0	0	0	0	0	0	0	0	1	33	13	41	9	7	10	48	43	13	21	29	19	24	13	20	11	14	8	30
1212	54	2	1	3	2	4	4	3	3	0	0	0	0	1	0	0	0	0	0	0	0	0	1	50	12	55	14	11	9	80	69	30	34	33	29	35	35	24	18	6	6	34	0	0	0	0	0	0	0
1213	53	2	1	3	1	3	2	4	3	0	0	0	0	0	0	0	0	0	0	0	0	0	0	40	16	51	1	4	11	64	62	31	23	27	24	24	32	29	9	4	4	39
1214	58	1	1	3	3	4	4	4	3	1	0	0	0	0	0	0	0	0	0	0	0	0	1	33	11	39	3	8	9	49	57	21	16	32	20	22	20	17	16	10	11	33	0	0	0	0	0	0	0
1215	47	2	1	3	3	4	2	2	3	0	0	0	0	1	0	0	0	0	0	0	0	0	1	37	12	51	4	14	6	71	56	33	24	25	28	31	35	31	23	14	6	47	0	0	0	0	0	0	0
1216	43	2	1	3	3	4	4	3	4	0	0	0	0	0	0	0	0	0	0	0	0	0	0	44	12	45	4	12	7	58	66	28	21	28	26	30	24	22
1217	54	2	1	3	3	4	2	3	3	0	0	0	0	0	0	0	0	0	0	0	0	0	0	25	11	34	3	21	10	52	51	19	20	31	21	24	19	24	14	11	7	30
1218	62	2	2	1	3	4	3	4	3	0	0	0	0	0	0	0	0	0	0	0	0	0	0	44	16	52	6	6	9	74	77	34	36	40	29	41	36	33	24	1	2	39	0	0	0	0	0	0	0
1219	45	2	1	3	3	4	4	2	3	0	0	0	0	0	0	0	0	0	0	0	0	0	0	37	11	53	4	10	7	55	59	32	11	40	30	42	32	21	16	11	3	27	0	0	0	0	0	0	0
1220	53	2	2	4	3	4	4	3	2	0	0	0	0	0	1	0	0	0	0	0	0	0	1	37	12	45	3	4	8	59	64	26	23	25	20	31	28	24	16	3	5	42	0	0	0	0	0	0	0
1221	59	2	4	4	3	4	2	4	2	0	0	1	0	1	0	0	0	0	0	0	0	0	1	31	11	28	7	17	7	39	50	10	14	21	18	25	16	19	13	20	12	25	0	0	0	0	0	0	0
1222	55	2	1	2	2	4	2	3	3	0	0	0	0	0	0	0	0	0	0	0	0	0	0	38	14	45	3	4	7	56	52	27	25	31	26	37	24	24	11	11	3	33	0	0	0	0	0	0	0
1223	44	2	1	3	3	3	4	4	2	0	0	0	1	1	0	0	0	0	0	0	0	0	1	34	12	55	1	9	4	58	53	27	13	39	30	33	31	26	19	5	9	26
1224	58	1	1	3	3	4	4	4	4	1	0	0	0	0	0	0	0	0	0	0	0	0	1	47	15	49	10	5	10	62	67	27	22	33	27	33	31	28	12	2	6	37
1225	49	2	1	3	3	4	4	2	3	0	0	1	0	0	0	0	0	0	0	0	0	0	1	42	14	36	6	13	9	68	70	33	27	32	27	33	34	29	17	8	4	43	0	0	0	0	0	0	0
1226	48	2	1	3	3	4	4	4	2														0	35	9	36	7	13	8	58	47	29	22	36	23	30	28	25	20	19	8	32
1227	61	1	1	2	3	4	4	3	3	0	0	1	0	0	0	0	0	0	0	0	0	0	1	45	14	55	2	6	10	53	62	27	20	35	26	37	31	25	12	3	2	22	0	0	0	0	0	0	0
1228	45	2	4	3	2	4	2	2	3	0	0	0	0	0	0	0	0	0	0	0	0	0	0	45	15	60	5	7	9	59	61	29	23	37	30	35	32	30	17	4	7	25
1229	42	2	1	3	3	3	1	2	2	0	0	0	0	0	0	0	0	0	0	0	0	0	0	35	14	50	1	10	9	60	74	24	30	33	28	32	17	23	20	8	6	35	0	0	0	0	0	0	0
1230	51	2	1	3	3	4	2	2	3	0	0	0	0	0	0	0	0	0	0	0	0	0	0	37	15	21	0	15	12	44	50	27	34	29	24	36	21	23	19	14	6	24
1231	58	2	1	3	3	4	3	1	3	0	1	1	0	0	0	0	0	0	0	0	0	0	1	35	13	39	6	13	9	70	60	27	36	36	28	38	32	27	17	19	6	40	0	0	0	0	0	0	0
1232	52	2	2	4	2	3	2	3	2	0	0	0	0	0	0	0	0	0	0	0	0	0	0	47	16	57	10	6	9	63	76	32	36	36	29	42	30	23	11	0	3	49
1233	65	2	1	2	3	2		3	3	0	0	1	0	0	0	0	0	0	0	1	0	0	1	40	14	45	7	6	8	68	81	27	35	33	27	40	33	31	21	4	4	53	0	0	0	0	0	0	0
1234	52	2	4	2	2	4	2	4	1	0	0	0	0	0	0	0	0	0	0	0	0	0	0	22	11	50	1	17	10	45	51	20	22	29	22	25	20	21	16	12	10	23
1235	58	2	2	1	2	4	2	3	1	1	0	1	0	0	1	0	0	0	0	0	0	0	1	41	15	54	5	5	10	48	63	31	27	42	28	37	21	21	13	10	6	39
1236	52	2	2	4	1	4	1	3	1	0	0	1	0	0	0	0	0	0	0	1	0	0	1	43	14	58	1	12	9	73	75	30	35	48	31	39	28	29			7	38
1237	63	1	1	2	3	2		4	3	1	0	1	1	0	0	0	0	0	1	0	0	0	1	34	16	43	4	7	7	57	70	28	29	41	26	24	30	17	18	23	3	35	0	0	0	0	0	0	0
1238	48	2	2	4	2	4	1	4	2	0	0	1	0	1	0	0	0	0	0	0	0	0	1	38	14	47	15	9	10	48	37	23	32	43	29	32	15	13	15	9	4	30
1239	59	2	1	3	2	4	2	4	3	0	0	0	0	0	0	0	0	0	0	0	0	0	0	38	14	57	1	8	8	55								22
1240	54	2	4	6	3	4	4	4	3	0	0	1	0	0	0	0	0	0	0	0	0	0	1	45	13	50	8	4	12	75	74	33	36	37	31	41	36	29	26	3	1	57	0	0	0	0	0	0	0
1241	54	2	1	3	3	4	4	3	4	0	0	0	0	0	0	0	0	0	0	0	0	0	0	40	12	43	7	7	9	59	65	32	30	28	26	39	28	24	20	18	5	46	0	0	0	0	0	0	0
1242	62	1	1	2	3	4	4	3	4	0	0	1	0	0	0	0	0	0	0	0	0	0	1	37	13	58	8	10	8	63	68	28	17	31	30	37	31	27	16	5	4	24	0	0	0	0	0	0	0
1243	55	2	2	6	3	4	3	4	3	0	0	0	0	0	0	0	0	0	0	0	0	0	0	39	13	37	4	14	8	55	76	28	33	38	26	36	24	18	21	8	7	34	0	0	0	0	0	0	0
1244	54	1	2	4	2	4	2	2	2	0	0	0	0	0	0	0	0	0	0	1	0	0	1	38	12	54	14	7	13	66	75	28	30	43	29	42	35	26	19	2	3	45	0	0	0	0	0	0	0
1245	64	1	1	2	3	4	3	2	3	0	0	0	0	0	0	0	0	0	0	0	0	0	0	43	16	55	10	5	12	76	86	31	36	38	31	38	31	31	19	0	3	47	0	0	0	0	0	0	0
1246	51	2	1	3	3	3	3	4	3	1	0	0	0	0	0	0	0	0	0	0	0	0	1	27	11	36	3	6	9	49	54	23	20	32	22	28	24	21	11	7	5	17
1247	46	2	4	4	2	3	2	3	2	0	0	0	0	0	0	0	0	0	0	0	0	0	0	38	12	46	7	7	10	53	55	26	22	34	25	32	24	23	16	22	4	44
1248	61	2	1	2	3	4	3	4	3	0	0	1	0	0	0	0	0	0	0	0	0	0	1	26	11	46	4	10	9	56	57	23	25	22	20	38	28	23	17	15	4	32	0	0	0	0	0	0	0
1249	56	2	1	3	3	4	4	4	4	0	0	0	0	0	0	0	0	0	0	0	0	0	0	36	14	49	0	6	11	70	78	32	32	38	29	40	36	28	19	7	8	47	0	0	0	0	0	0	0
1250	61	2	4	2	2	2		3	3	0	0	1	0	0	0	0	0	0	0	0	0	0	1	38	11	25	5	21	9	48								16
1251	50	2	4	1	3	4	4	2	3	0	0	0	0	0	0	0	0	0	0	0	0	0	0	43	16	53	8	5	9	66	65	30	36	39	27	35	28	22	20	7	0	51	0	0	0	0	0	0	0
1252	65	1	2	6	3	4	3	4	3	1	0	0	0	0	0	0	0	0	0	1	0	0	1	33	16	58	0	13	8	58	54	25	22	27	25	31	24	18	16	5	11	17	0	0	0	0	0	0	0
1253	51	1	1	3	3	4	3	4	4	0	0	0	0	0	0	0	0	0	0	0	0	0	0	40	16	59	8	7	12	60	70	29	14	41	29	40	30	27	17	1	2	29	0	0	0	0	0	0	0
1254	44	1	1	3	2	4	2	2	3	0	0	0	0	0	0	0	0	0	0	0	0	0	0	38	13	55	8	7	8	51	69	23	26	32	26	35	22	27	12	7	6	20
1255	45	2	1	3	3	1		4	3	0	0	1	0	0	0	0	0	0	0	0	0	0	1	44	15	58	4	12	11	69	68	24	33	29	29	38	33	32	20	8	7	55	0	0	0	0	0	0	0
1256	42	2	1	3	3	4	3	3	3	0	0	0	0	0	0	0	0	0	0	0	0	0	0	41	14	51	1	4	13	59	70	31	27	38	24	32	30	28	22	10	5	43	0	0	0	0	0	0	0
1257	46	2	2	2	3	4	1	3	4	0	0	0	0	0	0	0	0	0	0	0	0	0	0	43	16	58	5	5	10	61	73	34	33	34	29	39	34	32	22	7	5	49	0	0	0	0	0	0	0
1258	49	2	1	3	3	4	3	4	4	0	0	1	0	0	0	0	0	0	0	0	0	0	1	37	13	38	6	9	9	54	62	28	35	39	24	40	34	34	17	12	5	44
1259	46	2	2	4	2	4	2	3	2	0	0	0	0	0	0	0	0	0	0	0	0	0	0	40	12	43	4	16	5	72	69	34	35	43	29	36	31	27	21	3	14	44
1260	54	2	4	1	3	4	2	4	2	0	0	0	0	0	0	0	0	0	0	0	0	0	0	38	16	52	6	5	10	54	71	31	35	34	28	35	30	21	20	4	6	34	0	0	0	0	0	0	0
1261	44	2	2	4	3	4	3	3	2	0	0	0	0	0	0	0	0	0	0	0	0	0	0	37	12	36	3	14	7	65	58	26	31	30	26	35	30	21	22	20	9	38	0	0	0	0	0	0	0
1262	47	2	1	6	3	4	4	4	3	0	0	0	0	0	0	0	0	0	0	0	0	1	1	37	13	51	3	13	8	53	60	21	32	29	23	31	23	24	22	11	5	39
1263	43	2	1	3	3	3	3	4	3	0	0	0	0	0	0	0	0	0	0	0	0	0	0	40	12	55	5	16	11	54	63	28	36	37	23	30	27	24	20	18	4	47
1264	43	2	1	2	3	4	3	2	3	0	0	0	0	0	0	0	0	0	0	0	0	0	0	30	13	58	10	8	8	58	69	30	29	39	24	40	30	26	20	14	5	39	0	0	0	0	0	0	0
1265	43	2	1	3	3	4	3	3	3	0	0	0	0	0	0	0	0	0	0	0	0	0	0	40	12	47	3	7	6	62	68	27	29	29	26	31	31	31	8	9	5	40	0	0	0	0	0	0	0
1266	43	2	1	3	2	3	2	2	2	0	0	0	0	0	0	0	0	0	0	0	0	0	0	37	14	43	5	6	7	53	63	31	30	37	24	32	25	20	13	20	3	42	0	0	0	0	0	0	0
1267	62	1	1	3	2	2		4	4	1	0	0	0	0	0	0	0	0	0	0	0	0	1	44	16	56	8	4	8	66	64	26	23	29	21	29	27	27
1268	51	2	1	3	1	3	1	2	3	0	0	0	0	0	0	0	0	0	0	0	0	0	0	36	14	51	3	7	10	64	58	26	31	44	26	42	26	20	20	11	6	47
1269	50	1	1	3	3	4	4	4	4	0	0	0	0	0	0	0	0	0	0	0	0	0	0	38	13	33	1	11	9	30	36	18	19	31	15	29	18	15	15	23	8	23
1270	59	2	1	3	2	4	2	4	3	0	0	0	0	0	0	0	0	0	0	0	0	0	0	39	14	49	6	20	10	61	77	26	28	25	29	39	33	29	11	13	9	34
1271	43	2	1	3	3	4	3	4	3	0	0	0	0	0	1	0	0	0	0	0	0	1	1	40	16	57	4	8	9	62	79	34	27	39	26	41	35	33	21	3	3	39	0	0	0	0	0	0	0
1272	48	1	4	1	3	4	1	3	1	1	0	1	0	0	0	0	0	0	0	0	0	0	1	31	14	59	2	7	4	55	62	24	18	34	26	39	30	23	14	0	4	41
1273	54	2	2	4	3	4	3	3	2	0	0	0	0	0	0	0	0	0	0	0	0	0	0	43	14	55	11	5	8	62	48	21	25	33	21	36	28	30	23	8	11	39	0	0	0	0	0	0	0
1274	65	1	1	2	3	4	4	1	4	0	1	0	0	0	0	0	0	0	0	0	0	0	1	44	16	46	9	5	12	72	80	36	32	41	31	42	36	30	17	0	2	47	0	0	0	0	0	0	0
1275	44	2	4	1	3	4	3	4	2	0	0	0	0	0	0	0	0	0	0	0	0	0	0	41	14	48	7	7	6	69	75	30	31	29	32	36	31	28	20	12	5	45	0	0	0	0	0	0	0
1276	44	2	1	3	2	4	2	3	3	0	0	0	0	0	0	0	0	0	0	0	0	0	0	44	15	40	10	7	12	60	61	24	32	29	27	20	26	23	18	10	4	40	0	0	0	0	0	0	0
1277	50	2	1	3	2	4	2	3	3	0	0	0	0	1	0	0	0	0	0	0	0	0	1	26	7	31	1	18	7	57	49	21	25	32	19	30	21	20	12	22	13	33
1278	44	2	1	3	3	4	4	3	4	0	0	1	0	0	0	0	0	0	0	0	0	0	1	41	14	54	1	12	7	64	66	34	19	39	28	31	34	33	18	14	5	41	0	0	0	0	0	0	0
1279	47	2	1	3	3	4	4	3	3	0	0	0	0	0	0	0	0	0	0	0	0	0	0	46	14	40	8	6	9	70	73	30	36	28	28	39	36	30	25	7	1	50	0	0	0	0	0	0	0
1280	49	2	1	2	2	3	2	2	2	0	0	0	1	0	0	0	0	0	0	0	0	0	1	34	8	54	0	19	5	47	52	7	18	23	24	31	12	29	9	15	2	39
1281	50	1	1	3	3	4	2	4	3	0	0	0	0	0	0	0	0	0	1	0	0	0	1	30	7	19	2	9	7	36	40	8	10	32	16	28	15	16	8	12	4	15
1282	60	1	4	1	3	4	4	3	3	0	0	0	0	0	0	0	0	0	1	1	0	0	1	40	14	53	11	9	12	68	68	25	24	35	32	42	29	24	24	11	8	46	0	0	0	0	0	0	0
1283	51	2	2	3	2	4	2	2	3	0	0	0	0	0	0	0	0	0	0	0	0	0	0	36	14	48	3	6	12	63	68	33	30	40	28	36	32	23	18	5	4	42	0	0	0	0	0	0	0
1284	50	2	4	2	3	4	3	3	3	0	0	0	0	0	0	0	0	0	0	0	0	0	0	39	13	46	9	5	11	67	74	32	27	44	28	34	32	29	19	7	2	40
1285	47	1	4	5	3	3	1	2	2	0	0	0	0	0	0	0	0	0	0	0	0	0	0	33	15	59	4	8	9	49	65	29	30	41	28	36	27	24	17	4	6	34	0	0	0	0	0	0	0
1286	46	2	4	1	3	4	3	3	2	0	0	0	0	0	0	0	0	0	0	0	0	0	0	40	14	48	11	9	10	60	53	28	29	33	24	33	29	21	16	4	5	44	0	0	0	0	0	0	0
1287	44	2	4	1	3	4	2	3	2	0	0	0	0	0	0	0	0	0	0	0	0	0	0	42	14	35	10	12	9	53	35	13	22	29	22	33	30	18	16	16	5	21	0	0	0	0	0	0	0
1288	48	1	2	3	2	1		3	2	0	0	0	0	0	0	0	0	0	1	0	0	0	1	38	15	57	11	10	9	63	68	28	34	34	30	41	30	33	20	4	6	44	0	0	0	0	0	0	0
1289	58	2	1	3	3	4	3	4	3	1	0	0	0	0	0	0	0	0	0	0	0	0	1	41	13	53	7	9	11	70	70	24	34	42	30	36	26	32	21	12	8	40	0	0	0	0	0	0	0
1290	51	2	1	3	3	4	4	4	3	0	0	0	0	0	0	0	0	0	0	0	0	0	0	39	14	54	3	12	9	67	65	26	36	26	25	41	32	31	24	12	10	31
1291	55	2	1	3	3	4	4	2	3	0	0	0	0	0	0	0	0	0	0	0	0	0	0	40	16	42	8	15	11	56	67	21	28	29	23	30	24	20	23	3	10	39	0	0	0	0	0	0	0
1292	43	2	1	2	3	4	4	4	3	0	0	0	0	0	0	0	0	0	0	0	0	0	0	43	13	52	8	12	9	80	77	36	36	43	31	42	36	19	25	12	3	52	0	0	0	0	0	0	0
1293	52	2	1	3	2	4	2	3	3	0	0	0	0	1	0	0	0	0	0	0	0	0	1	35	15	60	4	4	11	63	85	34	31	36	29	35	31	24	12	0	6	47	0	0	0	0	0	0	0
1294	53	2	1	3	3	1		2	2	0	1	0	0	0	0	0	0	0	0	0	0	0	1	41	13	53	9	13	11	59	60	29	34	34	26	40	34	27	21	7	5	48	0	0	0	0	0	0	0
1295	52	1	1	3	3	4	3	3	3	1	0	0	0	0	0	0	0	0	0	0	0	0	1	47	16	57	7	6	6	71	81	33	28	36	31	39	36	32	15	5	3	27	0	0	0	0	0	0	0
1296	61	2	1	3	3	4	4	3	3	0	0	0	0	1	0	0	0	0	1	0	0	0	1	26	9	42	2	24	7	59	51	29	36	39	25	33	30	26	19	6	15	46	0	0	0	0	0	0	0
1297	45	2	2	1	2	4	2	2	2	0	0	0	0	0	0	0	0	0	0	0	0	0	0	44	15	60	8	7	7	70	82	36	35	41	31	41	36	27	17	1	5	41
1298	51	2	1	2	3	4	4	2	3	0	0	1	0	1	0	0	0	0	0	0	0	0	1	35	14	49	7	9	11	58	52	28	36	32	21	32	22	26	20	5	4	41	0	0	0	0	0	0	0
1299	61	2	1	2	2	4	2	3	3	0	0	0	0	0	0	0	0	0	0	0	0	0	0	42	15	58	7	9	11	68	81	33	36	39	30	42	34	30	20	4	4	38	0	0	0	0	0	0	0
1300	54	2	1	3	2	3	2	3	3	0	0	0	0	0	0	0	0	0	0	0	0	0	0	36	12	43	9	9	7	54	54	14	22	19	20	23	14	24	14	16	11	33	0	0	0	0	0	0	0
1301	45	2	4	1	3	4	3	3	2	0	0	0	0	0	0	0	0	0	0	0	0	0	0	42	12	58	4	8	10	63	75	36	35	40	28	41	34	29	22	5	4	34	0	0	0	0	0	0	0
1302	43	2	1	3	3	4	4	3	3	0	0	0	0	0	0	0	0	0	0	0	0	0	0	29	15	54	4	18	7	60	63	24	32	35	25	41	35	34	21	8	9	39	0	0	0	0	0	0	0
1303	50	2	1	3	2	4	2	1	3	1	0	1	0	1	0	0	0	0	0	0	0	0	1	24	7	36	1	8	6	41	38	12	6	34	24	31	7	21	10	34	6	24
1304	60	1	1	3	2	2		3	3	0	0	0	0	0	0	0	0	0	0	0	0	0	0	39	15	57	10	12	9	46	58	16	23	37	22	28	17	25	12	8	5	26
1305	44	2	2	4	3	1		3	1	0	0	0	0	0	0	0	0	0	0	0	0	0	0	48	16	60	5	4	8	75	87	31	34	43	30	40	34	34	20	3	2	53	0	0	0	0	0	0	0
1306	58	1	2	4	3	4	2	3	2	0	0	1	0	0	0	0	0	0	0	0	0	0	1	48	15	45	8	8	9	67	71	32	29	40	29	40	24	23	17	1	1	39	0	0	0	0	0	0	0
1307	58	2	1	2	1	1		3	3	1	0	1	0	0	0	0	0	0	0	0	0	0	1	33	13	38	4	15	10	55	48	28	29	22	23	20	25	26			8	37
1308	48	2	1	3	3	4	2	2	4	0	0	0	0	0	0	0	0	0	0	0	0	0	0	50	14	49	8	6	11	56	82	32	36	36	30	39	32	32	21	4	4	39
1309	66	1	1	3	1	2		3	3	0	0	0	0	0	0	0	0	0	0	0	0	0	0	38	16	42	3	8	6									29
1310	45	2	4	1	3	4	3	4	2	0	0	0	0	0	0	0	0	0	0	0	0	0	0	36	15	42	6	6	6	60	53	24	17	29	22	31	22	27	18	4	4	33
1311	45	2	2	4	2	4	2	4	2	0	0	0	0	0	0	0	0	0	0	0	0	0	0	42	16	52	14	9	9	70	74	30	33	37	26	36	29	30	10	0	5	46	0	0	0	0	0	0	0
1312	64	2	1	3	1	2		3	3	1	0	0	0	0	0	0	0	0	0	0	0	0	1	39	11	52	2	4	11	78	63	31	19	26	26	33	29	27
1313	56	2	2	1	2	4	2	1	2	0	0	0	0	0	0	0	0	0	0	0	0	0	0	40	15	50	8	6	11	71	65	33	36	31	30	39	32	27	14	2	9	46
1314	56	2	1	3	3	3	2	1	3	0	0	0	1	0	0	0	0	0	0	0	0	0	1	36	11	57	0	11	8	67	52	30	28	42	27	41	30	27	20	20	10	38	0	0	0	0	0	0	0
1315	50	2	4	3	3	4	3	3	3	0	0	0	0	0	0	0	0	0	0	0	0	0	0	43	14	54	5	5	11	74	78	35	34	38	30	42	35	23	17	4	3	27	0	0	0	0	0	0	0
1316	56	2	4	1	3	4	4	4	3	0	1	0	0	0	0	0	0	1	0	0	0	0	1	46	12	54	4	11	8	61	60	26	24	37	24	30	24	24	21	17	10	43	0	0	0	0	0	0	0
1317	48	2	2	4	3	4	3	4	3	1	0	0	0	0	0	0	0	0	0	0	0	0	1	36	13	55	5	14	8	65	62	29	27	28	28	41	32	22	23	7	7	46	0	0	0	0	0	0	0
1318	58	2	2	2	3	4	3	3	3	0	0	0	0	0	0	0	0	0	0	0	0	0	0	43	16	58	7	7	8	69	81	32	25	38	31	41	33	29	19	3	6	20	0	0	0	0	0	0	0
1319	48	2	1	3	3	4	4	1	4	0	0	0	0	0	0	0	0	0	0	0	0	0	0	46	13	56	8	7	9	72	73	34	31	24	29	30	35	29	24	8	4	26	0	0	0	0	0	0	0
1320	48	1	1	3	3	4	4	4	3	0	0	0	0	0	0	0	0	0	0	0	0	0	0	31	13	40	3	6	6	70	44	25	16	37	21	30	24	27	15	12	4	34	0	0	0	0	0	0	0
1321	61	2	1	2	3	4	3	1	4	0	0	0	0	0	0	0	0	0	0	0	0	1	1	43	14	53	7	10	10	73	80	34	35	36	28	37	36	33	17	12	6	41	0	0	0	0	0	0	0
1322	46	2	1	3	3	3	2	4	2	0	0	0	0	0	0	0	0	0	0	0	0	0	0	42	13	53	3	12	6	63	73	26	33	29	25	34	29	21	15	6	2	27
1323	53	2	2	3	2	4	2	3	3	0	0	0	0	0	0	0	0	0	0	0	0	0	0	34	14	53	6	6	12	63	68	25	35	44	31	41	27	22	20	5	4	32	0	0	0	0	0	0	0
1324	59	1	1	3	2	4	2	4	3	0	0	1	0	0	0	0	0	0	0	0	0	1	1	41	15	37	7	5	8	53	62	28	30	35	21	25	23	20	13	13	2	29	0	0	0	0	0	0	0
1325	53	2	1	3	3	4	2	1	3	0	0	0	0	0	0	0	0	0	0	0	0	1	1	44	15	44	4	8	9	73	73	31	31	32	25	37	35	27	15	1	6	47	0	0	0	0	0	0	0
1326	51	2	2	1	3	4	2	3	2	0	0	1	0	0	0	0	0	0	0	0	0	0	1	38	15	55	3	4	8	64	61	29	35	36	27	37	30	25	19	11	5	28	0	0	0	0	0	0	0
1327	53	2	2	4	3	3	3	4	4	0	0	0	0	0	0	0	0	0	0	0	0	0	0	36	14	52	4	14	10	70	77	33	32	42	24	41	33	32	23	6	6	48
1328	50	2	4	3	3	4	3	4	3	0	0	0	0	0	1	0	0	0	0	0	0	0	1	43	15	54	7	5	13	66	81	33	35	41	30	33	36	28	18	5	4	44	0	0	0	0	0	0	0
1329	60	2	4	1	3	4	3	3	2	1	0	0	0	0	0	0	0	0	0	0	0	0	1	42	16	59	8	5	8	69	73	34	28	37	31	32	35	25	13	0	2	46	0	0	0	0	0	0	0
1330	45	2	1	3	3	4	4	2	4	0	0	0	0	0	0	0	0	0	0	0	0	0	0	45	13	46	7	6	6	63	68	33	27	35	30	27	33	24			4	41
1331	55	2	2	4	2	4	2	3	3	1	0	0	0	0	0	0	0	0	0	1	0	0	1	23	11	44	1	9	6	39	47	9	21	24	18	28	13	24	15	8	7	35	0	0	0	0	0	0	0
1332	55	2	4	1	3	4	4	4	3	0	0	0	0	0	0	0	0	0	0	0	0	0	0	39	16	60	1	5	8	53	82	33	33	39	28	30	27	25	17	0	1	46	0	0	0	0	0	0	0
1333	46	2	2	4	3	4	3	4	3	0	0	0	0	0	0	0	0	0	0	0	0	0	0	39	13	53	0	15	6	59	69	25	32	33	26	31	27	24	16	11	15	48	0	0	0	0	0	0	0
1334	48	1	4	3	3	4	4	2	3	1	0	1	0	0	0	0	0	0	0	0	0	0	1	36	11	53	0	6	9	56	48	21	30	30	18	26	23	28
1335	53	2	1	3	3	4	2	3	4	0	0	1	0	0	0	0	0	0	0	0	0	0	1	39	15	46	7	10	8	72	84	34	33	39	30	35	36	27	19	6	4	48	0	0	0	0	0	0	0
1336	52	2	1	3	3	4	3	4	3	0	0	1	0	0	0	0	0	0	0	0	0	0	1	32	11	48	0	13	9									18
1337	45	2	1	3	3	4	3	3	4	0	0	0	0	0	0	0	0	0	0	0	0	0	0	44	14	57	4	7	9	77	76	33	25	38	31	31	36	29	25	8	6	31	0	0	0	0	0	0	0
1338	53	2	1	3	3	4	4	2	3	1	1	0	0	0	0	0	0	0	0	0	0	0	1	48	15	59	5	6	8	79	81	32	36	33	31	30	36	27	16	4	1	43	0	0	0	0	0	0	0
1339	49	2	1	3	2	1		1	3	0	1	0	0	0	0	0	0	0	0	0	0	0	1	26	14	35	2	13	9	57								33
1340	59	2	1	3	3	4	3	1	4	0	0	0	0	0	0	0	0	0	0	0	0	0	0	50	16	57	6	7	7	80	86	36	36	41	31	38	36	27	26	2	5	55	0	0	0	0	0	0	0
1341	63	1	1	3	3	4	4	3	3	0	0	1	0	0	0	0	0	0	0	0	0	0	1	37	16	55	4	8	11	75	84	35	28	39	31	32	35	22	18	0	6	33	0	0	0	0	0	0	0
1342	46	2	4	1	3	4	3	3	2	0	0	0	0	0	0	0	0	0	0	0	0	0	0	38	14	37	4	8	7									26
1343	55	2	1	3	3	3	2	2	3	1	1	1	0	0	0	0	0	0	0	1	0	0	1	39	13	53	5	7	10	58	70	32	30	32	28	40	31	29	17	5	4	26
1344	50	2	2	4	2	4	2	4	2	0	0	0	0	0	0	0	0	0	0	0	0	0	0	34	14	51	5	6	6	64	59	26	18	35	25	34	26	27	21	15	4	19
1345	42	2	4	1	3	4	3	4	1	0	0	1	0	0	0	0	0	0	0	0	0	0	1	35	11	56	12	7	11	50	49	17	15	32	21	34	19	31	17	20	8	29
1346	58	2	1	3	3	4	3	4	3	0	0	0	0	0	0	0	0	0	0	0	0	0	0	38	10	38	3	4	8	64	72	29	26	29	28	36	32	24	16	6	2	31	0	0	0	0	0	0	0
1347	46	2	4	1	2	4	2	3	2	0	0	0	0	0	0	0	0	0	0	0	0	0	0	50	16	56	5	6	6	57	57	28	20	29	24	27	27	22	11	9	7	24	0	0	0	0	0	0	0
1348	64	2	1	3	2	2		2	4	1	0	1	0	0	0	0	0	0	0	0	0	0	1	22	8	25	4	10	9	51	50	22	21	31	22	25	22	17	13	33	9	30
1349	54	2	1	3	2	1		3	2	0	0	0	0	0	0	0	0	0	0	0	0	0	0	40	15	58	8	8	7	55	72	30	14	39	29	33	26	23	11	2	5	21	0	0	0	0	0	0	0
1350	45	1	4	6	2	4	1	3	1	0	0	0	0	0	0	0	0	0	1	0	0	0	1	28	12	49	2	13	7	33	50	8	22	29	25	26	9	20	11	12	6	40	0	0	0	0	0	0	0
1351	43	2	1	3	3	4	4	3	2	0	0	0	0	0	0	0	0	0	0	0	0	0	0	36	12	38	2	10	6	54	65	27	22	33	26	38	33	33	17	7	5	35
1352	50	2	4	2	2	1		4	2	0	0	0	0	0	0	0	0	0	0	0	0	0	0	32	11	51	3	5	11	61	63	24	25	31	21	34	23	22	14	6	2	41
1353	66	2	2	1	2	2		4	4	0	1	0	0	0	0	0	0	0	0	0	0	0	1	44	14	60	6	4	9	46	46	17	16	33	22	16	11	11	10	9	5	32	0	0	0	0	0	0	0
1354	54	1	4	2	1	4	1	4	2	0	0	1	0	0	0	0	0	0	0	0	0	0	1	37	15	60	11	8	6	54	60	18	20	32	23	29	21	20	6	3	6	24	0	0	0	0	0	0	0
1355	47	2	4	5	3	4	2	2	3	0	0	0	0	0	0	0	0	0	0	0	0	0	0	43	13	53	7	10	9	61	48	17	33	37	24	36	26	31	21	18	4	48
1356	65	2	1	2	1	3	1	3	2	1	0	1	0	1	0	0	0	0	0	1	0	0	1	39	16	50	3	8	11	76	65	36	28	35	30	42	36	23	12	11	5	34	0	0	0	0	0	0	0
1357	49	2	4	1	2	4	2	4	3	0	0	0	0	0	0	0	0	0	0	0	0	0	0	40	12	40	9	15	7	53	49	23	28	38	26	42	25	27	25	9	8	36	0	0	0	0	0	0	0
1358	66	1	1	3	3	2		3	3	1	0	0	0	0	0	0	0	0	0	0	0	0	1	46	16	60	7	8	9	70	81	34	36	31	30	41	36	30	22	5	2	44	0	0	0	0	0	0	0
1359	46	1	1	2	3	4	3	3	4	0	0	0	0	0	0	0	0	0	0	0	0	0	0	47	12	50	14	4	10	49	42	30	20	31	17	31	19	32	19	7	6	36	0	0	0	0	0	0	0
1360	44	1	4	6	2	4	2	3	2	0	0	0	0	0	0	0	0	0	0	0	0	0	0	39	15	43	5	6	7	58	77	33	30	39	28	34	30	27	17	7	1	36
1361	57	2	2	3	3	1		4	3	0	0	0	0	0	0	0	0	0	0	0	0	0	0	41	15	55	6	8	9									26
1362	55	2	4	4	2	4	2	2	1	0	0	0	0	0	0	0	0	0	0	0	0	0	0	38	12	51	9	12	7	67	61	29	31	41	27	35	31	29	13	8	11	36
1363	43	2	4	3	3	4	3	1	3	0	0	0	0	0	0	0	0	0	0	0	0	0	0	42	13	46	6	6	10	64	71	29	28	35	29	34	29	25	16	8	8	44	0	0	0	0	0	0	0
1364	55	1	1	3	3	4	4	3	3	1	0	0	0	0	0	0	0	0	1	0	0	0	1	38	12	43	9	16	7	72	68	33	36	40	30	38	36	28			6	42
1365	46	2	4	3	3	4	1	2	3	0	0	0	0	0	0	0	0	0	0	0	0	0	0	38	14	52	3	7	8									23
1366	55	2	1	3	3	4	4	3	4	1	0	1	0	0	0	0	0	0	1	0	0	0	1	36	13	56	1	4	12	50	74	31	31	34	26	36	30	32	18	11	6	38	0	0	0	0	0	0	0
1367	45	2	4	3	3	4	2	3	3	0	0	0	0	0	0	0	0	0	0	0	0	0	0	31	12	57	3	7	6	56	59	19	30	36	23	37	23	28	15	9	10	24
1368	44	2	1	3	3	4	3	2	4	0	0	0	0	0	0	0	0	0	0	0	0	0	0	40	13	54	0	11	11	72	77	33	27	36	29	39	35	31	20	1	7	37
1369	55	1	1	3	3	4	4	3	4	0	0	0	0	0	0	0	0	0	0	0	0	0	0	36	11	46	6	13	11	68	57	34	34	33	29	40	34	33	23	15	8	37	0	0	0	0	0	0	0
1370	49	2	2	4	3	1		3	1	0	0	0	0	0	0	0	0	0	0	0	0	0	0	23	14	47	1	5	9	63	64	27	32	36	23	35	22	19	15	12	8	46	0	0	0	0	0	0	0
1371	58	2	3	4	3	4	4	4	3	0	0	0	0	0	0	0	0	0	0	0	0	0	0	38	13	59	1	7	8	58	59	27	27	31	21	29	26	26	24	10	2	46
1372	54	1	4	3	3	4	3	3	3	1	0	0	0	0	0	0	0	0	0	0	0	0	1	40	15	56	4	4	9	69	79	34	34	41	30	42	34	24	20	0	4	37	0	0	0	0	0	0	0
1373	45	2	1	3	1	4	3	2	3	0	0	0	0	0	0	0	0	0	0	0	0	0	0	38	13	48	9	7	12	62	69	36	27	37	31	39	36	29	18	7	5	48
1374	53	2	1	3	3	4	3	3	3	0	0	0	0	0	0	0	0	0	0	0	0	0	0	40	14	57	5	10	11	59	66	27	29	32	25	40	27	27	23	5	8	31	0	0	0	0	0	0	0
1375	44	2	4	1	3	4	3	4	2	0	0	0	0	0	0	0	0	0	0	0	0	0	0	43	14	54	4	5	12	65	75	27	34	35	29	33	29	29	17	5	4	45
1376	53	2	1	3	1	4	2	2	3	0	0	0	0	0	0	0	0	0	0	0	0	0	0	41	12	54	7	10	9	69	64	31	35	37	28	39	24	25	17	21	10	44	0	0	0	0	0	0	0
1377	55	2	2	3	3	4	2	3	3	0	0	0	0	1	0	0	0	0	0	0	0	0	1	31	12	40	3	12	10	53	44	24	20	26	23	39	32	25	21	13	13	25	0	0	0	0	0	0	0
1378	51	2	1	3	3	4	4	1	3	0	0	0	0	0	0	0	0	0	0	0	0	0	0	40	12	41	5	11	6	56	58	24	22	26	20	27	24	25	18	11	6	23	0	0	0	0	0	0	0
1379	42	2	2	4	3	4	1	3	2	0	1	1	0	1	0	0	0	0	0	0	0	0	1	27	8	45	2	16	8	58	44	24	30	41	25	34	27	20	21	28	11	28	0	0	0	0	0	0	0
1380	44	2	4	3	3	4	4	3	3	0	0	0	0	0	0	0	0	0	0	0	0	0	0	43	14	47	13	9	9	69	74	33	33	35	30	40	35	30	18	0	2	44	0	0	0	0	0	0	0
1381	45	1	4	1	3	4	3	4	3	0	0	1	0	0	0	0	0	0	0	0	0	0	1	39	15	53	13	9	8	56	73	27	27	36	29	35	29	31	16	2	5	28	0	0	0	0	0	0	0
1382	57	1	2	4	2	4	2	4	3	0	0	1	1	0	0	0	0	0	0	0	0	0	1	40	16	56	5	11	8	61	62	32	18	33	27	36	32	25	13	7	5	13
1383	62	2	1	2	3	4	2	3	3	1	0	0	0	0	0	0	0	0	0	0	0	0	1	39	12	36	0	10	7									24
1384	43	2	2	4	3	4	2	2	3	0	0	0	0	0	0	0	0	0	0	0	0	0	0	46	16	57	10	6	7	66	85	35	32	42	31	37	36	30	18	3	2	50	0	0	0	0	0	0	0
1385	52	1	1	3	3	4	4	3	3	0	1	0	0	0	0	0	0	0	0	0	0	0	1	42	16	59	9	5	11	63	81	32	25	40	30	40	35	28	17	6	4	31	0	0	0	0	0	0	0
1386	43	1	1	1	3	4	4	3	3	0	0	0	0	0	0	0	0	0	0	0	0	0	0	42	16	52	11	7	8	63	75	23	35	34	26	32	24	23	19	0	2	42	0	0	0	0	0	0	0
1387	62	2	2	1	3	3	3	4	3	0	0	0	0	1	0	0	0	0	0	0	0	1	1	37	15	53	5	8	9	64	66	27	22	32	29	33	30	24	17	5	10	43	0	0	0	0	0	0	0
1388	51	2	1	3	3	4	4	4	3	0	0	1	0	0	0	0	0	0	0	0	0	0	1	40	13	40	5	8	9									24
1389	44	2	2	3	2	4	4	3	3	0	0	0	0	0	0	0	0	0	0	0	0	0	0	33	11	52	4	6	8	50	77	26	35	34	26	30	24	14	11	4	4	38
1390	54	2	1	3	3	4	3	4	3	0	0	0	0	0	0	0	0	0	0	0	0	0	0	40	15	54	7	6	8	63	71	28	26	34	27	37	30	32	20	0	3	34	0	0	0	0	0	0	0
1391	46	1	1	3	1	3	2	2	3	0	0	0	0	0	0	0	0	0	0	0	0	0	0	42	15	49	15	4	8	68	64	32	25	36	24	29	29	25	9	3	1	42	0	0	0	0	0	0	0
1392	46	2	2	6	2	4	2	3	2	0	0	0	0	0	0	0	0	0	0	0	0	0	0	36	12	49	5	7	5	52	50	23	21	27	28	28	27	26	13	13	6	21	0	0	0	0	0	0	0
1393	50	2	4	2	2	4	2	4	4	0	0	0	0	0	0	0	0	0	0	0	0	0	0	43	16	59	2	5	8	60	75	32	28	36	29	41	29	26	16	8	2	34	0	0	0	0	0	0	0
1394	44	2	2	4	3	4	4	3	2	0	0	0	0	0	0	0	0	0	0	0	0	0	0	31	14	43	4	20	7	39								22
1395	55	1	1	3	2	4	2	3	3	1	0	0	0	0	1	0	0	0	0	0	0	0	1	41	16	58	5	5	12	66	63	29	32	34	24	37	31	26	18	2	5	33
1396	52	2	2	4	3	4	2	3	1	0	0	1	0	0	0	0	0	0	0	0	0	0	1	41	16	57	6	5	9	71	72	31	30	41	27	36	32	31	18	8	4	39
1397	58	1	1	2	3	4	4	1	3	0	0	0	0	0	0	0	0	0	0	0	0	0	0	37	12	43	4	7	9	61	60	23	30	37	28	28	30	21	19	9	2	38
1398	59	2	2	4	3	4	3	4	3	1	0	0	1	0	0	0	0	0	0	0	0	0	1	39	16	60	1	11	11	61	58	24	18	26	23	33	25	35	19	11	7	23
1399	56	1	1	3	3	1		3	3	1	0	1	0	0	0	0	0	0	0	0	0	0	1	37	15	33	4	11	7	51	55	14	15	21	22	39	18	28	20	5	7	26
1400	50	2	1	3	3	4	3	3	4	0	0	0	0	0	0	0	0	0	0	0	0	0	0	44	16	51	9	6	11	70	63	30	34	39	26	37	35	32	19	3	4	30
1401	56	2	2	3	3	4	2	3	2	0	0	0	0	0	0	0	0	0	0	1	0	0	1	37	15	49	0	5	10	65	55	24	24	31	31	40	30	26			5	31
1402	48	2	4	1	3	4	3	4	3	0	0	1	0	0	0	0	0	0	0	0	0	0	1	32	13	42	11	12	8	79	69	32	33	42	31	41	35	26
1403	61	2	1	2	3	4	2	4	3	0	0	0	0	0	0	0	0	0	0	0	0	0	0	41	14	46	6	8	7	59	69	29	33	30	29	31	30	26	17	12	5	41
1404	54	1	1	3	3	4	4	3	4	0	0	0	0	1	0	0	0	0	0	1	0	0	1	43	14	59	11	4	8									27
1405	57	1	1	3	3	4	3	2	3	0	0	0	0	0	0	0	0	0	0	0	0	0	0	35	12	48	6	7	7	52	45	21	26	30	22	35	24	25	20	21	8	28	0	0	0	0	0	0	0
1406	44	2	2	4	2	4	3	2	2	0	0	0	0	0	0	0	0	0	0	0	0	0	0	31	13	44	8	7	8	46	55	22	24	26	22	39	27	25	13	22	4	35
1407	55	2	1	3	3	4	3	4	3	0	0	0	0	1	0	0	0	0	0	0	0	0	1	32	9	32	4	9	8	63	67	28	26	33	27	33	30	25	19	12	2	32
1408	43	1	4	1	3	4	3	4	2	0	0	1	0	0	0	0	0	0	0	0	0	0	1	34	14	43	4	7	7	44	55	17	12	24	17	30	14	16	16	6	6	21	0	0	0	0	0	0	0
1409	46	2	1	3	3	4	4	3	3	0	0	0	0	0	0	0	0	0	0	1	0	0	1	29	11	22	5	4	8	49	52	22	26	39	22	21	11	17	13	19	3	37
1410	59	2	1	3	3	3	3	2	3	0	0	0	0	0	0	0	0	0	0	0	0	0	0	41	15	55	3	6	9	65	70	31	32	26	27	39	30	29	16	8	4	35
1411	56	2	1	3	2	4	2	1	4	0	0	0	0	0	0	0	0	0	0	0	0	0	0	40	16	43	8	6	8									22
1412	47	1	1	3	3	4	4	3	3	0	0	0	0	0	0	0	0	0	0	0	0	0	0	44	14	59	13	6	10	74	70	33	32	39	22	25	34	30	17	2	5	41	0	0	0	0	0	0	0
1413	65	1	1	2	3	2		3	3	1	1	1	0	1	0	0	0	1	1	0	0	1	1	33	16	54	9	10	11	55	57	25	28	38	21	21	26	22	19	8	3	45
1414	50	1	2	4	3	4	3	3	2	0	0	0	1	0	0	0	0	0	1	0	0	0	1	34	15	56	9	9	12	63	52	26	22	34	24	32	26	27	20	7	10	37
1415	42	2	1	3	3	4	4	2	3	0	0	0	0	0	0	0	0	0	0	0	0	0	0	37	16	57	2	5	8	77	72	33	33	43	28	32	35	34
1416	45	2	4	1	3	4	3	4	2	0	0	0	0	0	0	0	0	0	0	0	0	0	0	38	10	34	8	10	5	58	49	23	18	27	25	35	27	20	19	8	5	38
1417	48	1	4	2	3	4	4	4	3	0	0	0	0	1	0	0	0	0	0	0	0	0	1	45	14	42	6	13	10	50	60	29	36	30	25	33	22	23	22	9	9	25	0	0	0	0	0	0	0
1418	49	1	4	1	3	4	2	3	2	0	0	0	0	0	0	0	0	0	0	0	0	0	0	39	15	44	8	9	3	64	62	23	33	35	26	42	28	26	18	6	2	36
1419	46	2	1	3	3	1		3	1	0	0	0	0	0	0	0	0	0	0	0	0	0	0	39	15	55	6	10	7	75	80	32	34	40	29	39	35	26	16	0	5	34
1420	51	2	2	4	3	4	4	4	3	0	0	0	0	0	0	0	0	0	0	0	0	0	0	33	15	42	4	6	13	54	66	28	31	30	27	40	31	30	18	5	2	37
1421	50	2	1	3	2	3	2	2	3	0	0	0	0	0	0	0	0	0	0	0	0	0	0	39	13	40	6	8	8	78	62	32	32	29	26	41	34	26	12	1	3	37	0	0	0	0	0	0	0
1422	48	2	1	3	2	4	4	2	4	0	0	0	0	0	0	0	0	0	0	1	0	0	1	38	13	53	7	16	6	54	51	21	20	40	22	26	25	21	15	9	10	33	0	0	0	0	0	0	0
1423	47	1	4	3	3	4	3	4	4	0	0	0	0	0	0	0	0	0	0	0	0	0	0	42	14	51	4	4	10	64	62	33	35	45	30	36	31	27	23	3	4	44
1424	53	2	2	4	3	4	3	2	3	0	0	0	0	0	0	0	0	0	0	0	0	0	0	30	13	60	3	11	8	54	60	20	21	39	22	30	19	19	19	9	9	42	0	0	0	0	0	0	0
1425	42	2	1	3	3	4	2	1	3	0	0	0	0	0	0	0	0	0	0	0	0	0	0	40	15	53	5	7	7	58	77	32	33	38	31	40	30	29	22	5	7	42
1426	46	1	2	2	3	4	4	4	4	0	0	0	0	0	0	0	0	0	0	0	0	0	0	43	16	60	4	7	7	70	77	35	36	41	29	41	32	28	17	3	4	48	0	0	0	0	0	0	0
1427	43	2	1	3	3	4	3	4	3	0	0	0	0	0	0	0	0	0	0	0	0	1	1	43	14	52	1	11	9	50	55	28	30	28	27	37	32	24	22	4	8	42
1428	61	2	2	4	3	4	4	4	3	0	0	1	0	0	0	0	0	0	0	1	0	0	1	35	16	52	4	6	10	77	83	35	35	36	32	41	31	27	22	5	9	47
1429	48	2	4	6	3	1		1	1	0	0	0	0	1	0	0	0	0	0	0	0	0	1	37	12	51	1	8	8	65	67	27	36	39	25	39	29	22
1430	54	2	2	4	3	3	3	4	2	0	1	0	0	1	0	0	0	0	0	0	0	0	1	45	11	38	10	12	9	78	46	33	23	27	25	30	28	21	21	14	9	35
1431	60	2	2	4	3	1		4	2	1	0	1	0	0	0	0	0	0	0	1	0	0	1	35	12	52	5	7	10	52	54	17	33	25	25	33	21	27	20	16	3	41	0	0	0	0	0	0	0
1432	55	1	2	1	2	4	2	3	2	0	0	1	0	0	0	0	0	0	0	0	0	0	1	32	14	49	3	15	7	56	68	27	24	28	25	34	25	26	18	11	6	34	0	0	0	0	0	0	0
1433	62	2	4	1	3	4	4	3	3	0	0	0	0	0	0	0	0	0	0	0	0	0	0	48	16	51	5	6	10	80	86	35	35	41	31	42	36	27	22	0	4	44	0	0	0	0	0	0	0
1434	43	2	1	3	3	3	3	3	4	0	0	0	0	0	0	0	0	0	0	0	0	0	0	37	12	43	3	14	7	76	61	30	20	39	29	41	36	35	21	12	5	35
1435	53	2	2	4	3	1		3	4	0	0	0	0	0	0	0	0	0	0	0	0	0	0	44	14	57	8	7	12									25
1436	46	2	4	1	3	4	3	4	2	0	0	0	0	0	0	0	0	0	0	0	0	0	0	46	16	57	9	5	10	68	75	30	35	38	31	40	34	31	16	1	6	49	0	0	0	0	0	0	0
1437	61	1	4	5	3	3	3	3	3	0	1	0	0	0	0	0	0	1	1	1	0	0	1	23	13	27	2	10	10	69	83	25	25	31	27	42	34	31	21	13	6	28	0	0	0	0	0	0	0
1438	52	2	1	2	2	4	2	3	2	0	1	0	0	0	0	0	0	0	0	0	0	0	1	40	16	54	5	11	9	60								26	16	1	11	37
1439	52	2	1	3	3	1		4	2	0	0	0	0	0	0	0	0	0	0	0	0	0	0	36	15	60	2	6	7	56	73	25	29	33	25	39	32	28	22	7	7	42
1440	53	2	1	3	3	1		3	3	0	0	0	0	0	0	0	0	0	0	0	0	0	0	40	13	38	9	10	7	56	56	26	26	28	20	27	24	18	21	15	9	33
1441	51	2	1	3	3	4	4	3	3	0	0	0	0	0	0	0	0	0	0	1	0	0	1	36	14	56	5	7	8	65	62	33	28	35	24	38	35	25	17	8	5	35
1442	43	1	4	1	3	4	4	3	2	0	0	0	0	0	0	0	0	0	0	0	0	0	0	46	13	53	10	5	4	61	54	31	32	27	22	37	33	29	20	10	9	39	0	0	0	0	0	0	0
1443	44	1	4	5	3	1		2	1	0	0	1	0	0	0	0	0	0	0	0	0	0	1	36	15	53	1	4	6	51	50	19	15	29	27	37	24	28	14	5	1	2
1444	65	2	1	2	3	3	2	4	3	1	0	0	0	0	0	0	0	0	1	0	0	0	1	34	14	49	2	6	9	73	85	30	34	36	31	42	32	27	22	10	1	38	0	0	0	0	0	0	0
1445	64	1	1	3	2	2		2	2	1	1	1	1	0	0	0	0	1	0	0	0	0	1	32	12	34	4	8	7	60	36	24	26	26	19	27	26	21	13	15	5	12
1446	47	1	1	3	3	4	3	3	3	0	0	0	0	1	1	0	0	0	0	0	0	0	1	27	12	33	11	15	9	56	61	26	18	40	28	38	29	22	15	4	9	25	0	0	0	0	0	0	0
1447	64	2	3	4	3	4	4	4	3	0	0	1	0	0	0	0	0	0	0	0	0	0	1	42	16	56	8	13	6	74	66	33	34	35	30	36	36	26	26	9	5	37
1448	59	1	2	2	3	4	4	1	3	1	0	0	1	0	0	0	0	0	0	0	0	0	1	38	15	56	5	10	8	64	73	30	25	42	25	30	29	14	21	6	5	34	0	0	0	0	0	0	0
1449	63	2	1	3	3	1		4	3	0	0	0	0	0	0	0	0	0	0	0	0	0	0	44	14	48	10	4	11	68	86	35	35	37	31	38	35	30	21	2	1	39	0	0	0	0	0	0	0
1450	45	2	4	2	3	4	3	3	3	0	0	0	0	0	0	0	0	0	0	0	0	0	0	33	11	59	3	11	6	71	55	34	32	35	29	39	34	29	25	8	5	30
1451	45	2	1	3	3	3	2	2	3	0	0	0	0	0	0	0	0	0	0	0	0	0	0	43	15	47	5	4	11									27
1452	46	2	1	3	3	4	4	3	3	0	0	0	0	0	0	0	0	0	0	0	0	0	0	42	15	60	0	6	11	66	66	36	33	33	31	42	35	26	17	2	5	39
1453	66	2	1	2	3	3	3	2	3	0	0	1	0	1	0	0	0	0	0	1	0	0	1	33	12	34	6	10	12	64	54	23	20	29	21	29	21	18	10	11	5	27	0	0	0	0	0	0	0
1454	46	2	4	4	3	4	4	4	4	0	0	0	0	0	1	0	0	0	0	0	0	0	1	45	16	47	4	5	10	70	86	33	36	38	30	42	34	32	23	0	4	51	0	0	0	0	0	0	0
1455	64	2	1	2	3	4	4	4	3	0	0	0	0	0	0	0	0	0	0	1	0	0	1	42	13	58			9	62	69	28	21	37	29	42	28	26	16	8	6	35	0	0	0	0	0	0	0
1456	51	2	1	3	3	4	2	1	4	0	0	0	0	0	0	0	0	0	0	0	0	0	0	38	14	57	6	6	8	64	72	34	36	30	29	35	31	27	20	6	7	53
1457	48	2	4	1	3	4	4	4	3	0	0	0	0	0	0	0	0	0	0	0	0	0	0	40	12	34	3	9	7	73	69	33	22	38	25	39	35	21	23	9	3	46	0	0	0	0	0	0	0
1458	43	2	1	3	3	4	3	4	3	0	0	0	0	0	0	0	0	0	0	0	0	0	0	46	16	55	1	13	10	75	71	31	28	38	28	36	35	35	19	3	6	51	0	0	0	0	0	0	0
1459	45	2	1	3	3	4	4	4	2	0	0	0	0	0	0	0	0	0	0	0	0	0	0	38	12	47	10	7	10	64	56	30	30	34	22	33	28	26	20	31	9	35	0	0	0	0	0	0	0
1460	55	2	1	3	3	4	3	1	3	0	0	0	0	0	0	0	0	0	0	0	0	0	0	40	15	58	3	5	10	58	75	33	26	36	23	36	27	24	18	0	2	32
1461	42	1	1	2	3	4	3	4	3	0	0	0	0	0	0	0	0	0	0	0	0	0	0	45	15	57	10	12	9	74	86	36	35	41	31	42	36	35	22	2	5	39	0	0	0	0	0	0	0
1462	50	2	2	4	3	4	4	4	3	0	0	0	0	0	1	0	0	0	0	0	0	0	1	42	13	48	4	11	6	60	57	28	24	22	28	40	30	26	27	4	8	36
1463	48	1	1	3	3	4	3	3	3	0	0	1	0	0	0	0	0	0	0	0	0	0	1	33	14	38	1	6	9	58	57	25	25	34	26	33	29	27
1464	43	2	4	2	2	4	2	4	2	0	0	0	0	0	0	0	0	0	0	0	0	0	0	35	12	50	2	6	6	55	59	28	28	33	20	32	28	28			7	38
1465	62	2	1	2	3	4	3	4	3	1	0	0	0	0	0	0	0	0	0	0	0	0	1	42	15	57	1	11	10	67	74	28	36	30	27	38	29	26	20	2	4	49
1466	58	2	1	3	3	4	4	4	2	0	0	0	0	0	0	0	0	0	0	0	0	0	0	37	12	34	3	15	8	64								23
1467	66	2	1	3	3	2		3	2	1	0	0	1	0	0	0	0	0	0	0	0	0	1	37	15	58	2	5	8	72	87	30	31	32	31	40	35	33	19	2	2	37	0	0	0	0	0	0	0
1468	51	2	1	3	3	4	3	3	3	0	0	0	0	0	0	0	0	0	0	0	0	0	0	33	14	55	2	8	9	54	78	25	22	40	25	34	26	24	18	5	2	47	0	0	0	0	0	0	0
1469	54	1	1	2	2	3	2	2	3	1	0	0	0	0	0	0	0	0	0	0	0	0	1	40	14	56	5	7	8	52	56	22	32	35	23	31	23	28	18	10	5	30
1470	49	2	1	3	2	4	4	4	3	0	0	0	0	0	0	0	0	0	0	0	0	0	0	35	14	48	2	5	10	73	83	30	30	39	31	40	33	28	21	3	1	51	0	0	0	0	0	0	0
1471	47	2	1	3	2	4	2	4	3	0	0	0	0	0	0	0	0	0	0	0	0	0	0	39	16	59	7	4	9	64	71	27	36	39	30	40	31	35	12	3	6	39	0	0	0	0	0	0	0
1472	50	2	1	3	3	4	4	3	4	0	0	0	0	0	0	0	0	0	0	0	0	0	0	33	8	37	0	10	8	57	42	28	31	38	18	27	30	20	22	16	7	25
1473	55	1	1	2	3	4	3	4	3	0	1	0	0	0	0	0	0	0	0	0	0	1	1	42	16	58	15	8	9	64	67	24	29	30	26	31	26	25	20	3	6	36
1474	50	2	2	3	1	1		2	3	0	0	0	0	0	0	0	0	0	0	0	0	0	0	32	9	56	0	16	8	52	56	25	29	26	19	33	25	22	12	20	6	24
1475	60	2	1	2	3	3	2	2	3	1	0	0	0	0	0	0	0	0	0	1	0	0	1	38	14	54	5	7	11	65	68	30	34	34	29	39	32	26	23	10	6	42	0	0	0	0	0	0	0
1476	50	2	4	2	3	4	3	4	2	0	0	0	0	0	0	0	0	0	0	0	0	0	0	31	14	47	1	7	9	70	71	34	35	41	30	41	34	23	19	3	4	35
1477	57	2	1	3	3	4	4	4	4	0	0	1	0	0	0	0	0	0	0	0	0	0	1	35	11	52	1	10	11	53	66	32	22	31	25	35	27	23	21	23	6	36
1478	54	1	1	2	3	4	4	3	3	0	0	0	0	0	0	0	0	0	0	0	0	0	0	43	15	58	1	6	8	58	86	33	30	42	30	31	30	23	15	2	1	36	0	0	0	0	0	0	0
1479	45	2	4	1	3	4	3	3	2	0	0	0	0	0	0	0	0	0	0	0	0	0	0	38	15	52	7	5	7	70	74	36	35	29	30	39	35	30	19	5	7	48	0	0	0	0	0	0	0
1480	42	2	1	3	3	3	2	4	3	0	0	0	0	0	0	0	0	0	0	0	0	0	0	36	15	49	5	9	10	60	67	29	32	28	24	29	25	24	13	7	4	32	0	0	0	0	0	0	0
1481	54	2	1	3	3	3	3	3	3	0	0	0	0	0	0	0	0	0	0	0	0	1	1	37	12	30	5	4	8	58	71	28	35	27	31	29	26	16	16	10	5	44
1482	49	1	1	3	2	4	2	3	3	0	0	1	0	0	0	0	0	0	0	0	0	0	1	35	13	42	3	17	6	53	46	22	21	25	19	29	20	22
1483	50	2	2	4	2	4	2	1	1	0	0	0	0	0	0	0	0	0	0	0	0	0	0	46	13	58	6	4	11	77	74	35	36	38	31	39	36	24	13	1	4	37	0	0	0	0	0	0	0
1484	61	1	1	6	2	4	2	2	3	0	0	1	0	0	0	0	0	0	1	0	0	0	1	33	15	53	0	8	6	44	63	21	22	31	21	31	15	20	10	12	6	7
1485	54	2	1	3	2	3	2	4	2	0	0	0	0	1	0	0	0	0	0	0	0	0	1	33	12	42	1	6	9	47	57	28	21	27	24	29	28	21	13	15	6	33
1486	48	2	1	2	2	4	2	2	3	0	0	1	0	0	0	0	0	0	0	0	0	0	1	33	13	54	7	9	9	58	83	35	32	32	32	36	36	29	7	1	4	32	0	0	0	0	0	0	0
1487	61	2	2	1	3	3	3	2	3	1	0	1	0	1	0	0	0	0	0	0	0	0	1	38	15	60	2	7	8	75	69	29	27	37	28	42	35	24	22	11	9	40	0	0	0	0	0	0	0
1488	44	1	2	3	3	4	4	4	4	0	0	1	0	0	0	0	0	0	0	0	0	0	1	38	14	52	2	5	11	67	72	32	23	37	26	38	33	24	17	5	2	34
1489	46	1	1	3	3	4	4	2	3	0	0	0	0	0	0	0	0	0	0	0	0	0	0	39	14	58	8	6	9	72	81	33	25	37	30	41	36	31	21	2	5	46
1490	66	1	2	2	1	1		2	3	0	0	0	1	0	0	0	0	0	0	0	0	0	1	33	14	31	8	5	8	56	75	24	30	37	25	30	25	24	8	7	6	35	0	1	0	0	0	0	0
1491	66	2	1	3	3	2		1	4	0	0	1	1	1	0	0	0	0	0	0	0	0	1	33	15	49	2	6	8									30
1492	46	2	4	1	3	4	3	4	3	0	0	0	0	0	0	0	0	0	0	0	0	0	0	40	16	60	7	8	6	56	69	24	30	32	27	36	25	22	17	9	7	49	0	0	0	0	0	0	0
1493	42	2	2	4	3	4	3	3	2	0	1	0	0	0	0	0	0	0	0	0	0	0	1	27	10	43	8	8	9	52	57	18	28	32	22	32	19	28	18	9	7	47	0	0	0	0	0	0	0
1494	51	1	3	4	3	4	2	3	2	0	0	0	0	0	0	0	0	0	0	0	0	0	0	38	14	53	6	6	11	59	61	24	30	29	26	38	25	29	20	3	6	40
1495	59	2	1	2	3	3	3	4	4	0	0	1	0	0	0	0	0	0	0	0	0	0	1	39	16	47	3	7	9	76	75	32	36	38	28	42	34	31	22	1	5	31	0	0	0	0	0	0	0
1496	48	2	1	3	2	4	2	4	4	0	0	0	0	0	0	0	0	0	0	0	0	0	0	44	15	58	6	5	7	69	75	30	35	34	26	35	35	29	18	11	5	40	0	0	0	0	0	0	0
1497	57	2	1	6	2	1		2	3	1	0	1	0	0	1	0	0	0	0	0	0	0	1	38	12	39	11	18	8	59	58	30	29	36	23	34	30	27	14	16	14	51
1498	49	2	4	6	3	4	3	4	4	0	0	0	0	0	0	0	0	0	0	0	0	0	0	36	11	55	6	5	8	55	71	30	34	36	30	30	32	22	14	8	5	28
1499	63	1	1	3	2	2		4	3	0	0	1	0	0	0	0	0	0	0	0	0	0	1	40	14	54	10	10	11	62	53	21	24	31	23	31	23	22	17	12	9	29	0	0	0	0	0	0	0
1500	49	1	1	3	3	4	3	3	2	0	0	0	0	0	0	0	0	0	0	0	0	0	0	32	13	59	7	10	10	72	81	36	36	39	31	42	36	31	18	3	1	39	0	0	0	0	0	0	0
1501	64	2	1	2	2	4	2	4	3	0	0	1	0	0	0	0	0	0	0	0	0	0	1	38	16	44	4	5	8	50	67	20	25	28	18	27	20	25	21	14	6	23	0	0	0	0	0	0	0
1502	44	1	1	3	3	4	4	4	3	0	0	0	0	0	0	0	0	0	0	0	0	0	0	42	13	54	3	7	8	64	51	22	31	28	20	38	28	27	24	15	7	48	0	0	0	0	0	0	0
1503	49	2	4	1	3	4	3	4	3	0	0	0	0	0	0	0	0	0	0	0	0	0	0	37	12	34	2	16	9	62	42	21	31	28	20	35	27	16	20	29	4	39
1504	55	2	1	3	3	4	2	4	3	0	0	0	0	1	0	0	0	0	0	0	0	0	1	28	12	49	8	20	10	60	55	26	21	36	25	39	30	22	19	12	7	25	0	0	0	0	0	0	0
1505	61	1	1	3	2	2		1	3	0	0	1	0	0	0	0	0	0	0	0	0	0	1	40	12	46	9	7	11	59	70	31	17	25	26	34	29	26	15	11	2	37	0	0	0	0	0	0	0
1506	46	2	4	1	3	4	3	4	1	0	0	0	0	0	0	0	0	0	0	0	0	0	0	36	14	57	8	6	11	61	65	23	26	31	27	28	27	26	16	4	3	35
1507	47	2	1	3	3	4	4	2	3	0	0	0	0	0	0	0	0	0	0	0	0	0	0	40	15	59	0	9	8	66	79	33	29	35	29	34	36	30	16	4	2	39	0	0	0	0	0	0	0
1508	45	2	1	3	3	3	4	4	3	0	0	1	0	0	0	0	0	0	0	0	0	0	1	29	14	50	2	9	9	54	73	30	33	36	28	32	21	20	25	16	4	42	0	0	0	0	0	0	0
1509	43	2	1	3	3	4	3	3	3	0	0	0	0	0	0	0	0	0	0	0	0	0	0	41	14	60	4	7	9	63	82	29	30	32	29	38	35	30	17	3	4	39	0	0	0	0	0	0	0
1510	61	2	2	1	3	4	3	3	3	1	0	1	1	1	1	0	0	0	0	1	0	0	1	24	10	33	3	18	10	52	61	20	15	39	21	27	21	22	18	11	8	36	0	0	0	0	0	0	0
1511	66	1	1	3	3	4	4	2	3	0	0	0	0	0	0	0	0	0	0	0	0	0	0	46	15	56	9	5	11	73	84	35	36	36	30	34	36	28	21	9	3	48	0	0	0	0	0	0	0
1512	62	1	2	1	3	4	2	4	2	1	1	0	0	0	0	0	0	0	0	0	0	0	1	33	13	50	4	13	12	56	57	28	22	31	25	31	29	23	20	14	6	28	0	0	0	0	0	0	0
1513	62	2	1	3	3	4	3	1	3	0	0	0	0	1	1	1	1	0	0	1	0	0	1	40	15	44	6	7	12	63	84	34	36	41	31	42	36	27	20	4	3	44
1514	48	1	1	2	3	4	3	4	4	1	0	0	0	0	0	0	0	0	0	0	0	0	1	48	16	59	4	5	9	65	67	34	27	38	27	26	29	26	20	1	7	39	0	0	0	0	0	0	0
1515	56	1	4	2	3	4	3	3	3	1	0	1	0	0	0	0	0	0	0	0	0	0	1	31	14	50	6	11	9	64	79	30	29	39	28	35	32	27	23	2	4	50
1516	64	2	1	3	3	4	4	4	3	0	0	1	0	0	0	0	0	0	0	0	0	0	1	43	16	60	4	11	9	72	70	30	30	41	31	34	31	31	23	3	7	40	0	0	0	0	0	0	0
1517	50	1	4	3	3	4	4	3	3	0	0	0	0	0	0	0	0	0	0	0	0	0	0	40	15	52	4	7	9	60	65	31	29	31	22	29	28	25	17	8	6	38	0	0	0	0	0	0	0
1518	47	2	4	6	2	1		3	2	0	0	0	0	0	0	0	0	0	0	0	0	0	0	43	13	55	6	6	7	64	56	30	28	29	23	36	26	27	19	15	5	33
1519	43	2	1	3	3	4	3	3	3	0	0	0	0	0	0	0	0	0	0	0	0	0	0	41	16	51	6	8	7	67	74	30	23	39	30	36	31	28	21	5	6	33
1520	64	1	1	3	3	2		2	3	0	0	0	1	1	0	0	0	0	0	0	0	0	1	34	11	52	4	8	9	61	63	25	23	31	24	35	26	19	20	12	9	31	0	0	0	0	0	0	0
1521	61	2	1	3	2	4	2	3	3	1	0	1	0	0	0	0	0	0	0	0	0	0	1	40	13	57	5	6	9	59	79	34	31	34	33	37	35	29	14	7	5	24	0	0	0	0	0	0	0
1522	61	1	1	3	2	4	2	3	3	1	0	1	0	0	0	0	0	0	0	0	0	0	1	35	13	58	5	6	10	57	68	30	22	34	25	34	28	26	8	11	5	31	0	0	0	0	0	0	0
1523	48	1	1	3	3	4	3	3	3	0	0	0	0	0	0	0	0	0	0	0	0	0	0	42	14	49	6	7	10	63	63	26	34	37	25	33	33	25	18	10	8	45	0	0	0	0	0	0	0
1524	64	1	2	2	2	2		3	3	0	0	1	0	0	0	0	0	0	0	0	0	1	1	33	14	55	0	7	8	60	61	18	17	32	30	33	22	24	11	1	3	22	0	0	0	0	0	0	0
1525	44	2	1	3	3	4	3	4	3														0	43	15	51	5	8	9	65	65	26	21	38	29	29	34	32	19	13	5	40	0	0	0	0	0	0	0
1526	43	2	1	3	3	4	4	3	3	0	0	0	0	0	0	0	0	0	0	0	0	0	0	34	12	41	4	6	7	53	47	19	27	25	20	26	21	20	18	19	3	34	0	0	0	0	0	0	0
1527	60	2	1	2	2	4	2	2	2	0	0	0	0	0	0	0	0	0	0	0	0	0	0	27	12	44	7	7	10	63	74	29	24	26	29	34	31	24	13	14	4	39	0	0	0	0	0	0	0
1528	54	2	1	2	3	4	3	2	4	0	0	0	0	0	0	0	0	0	0	0	0	0	0	32	12	50	6	12	8	58	51	28	34	30	26	37	31	28	25	7	4	37
1529	60	1	1	2	3	4	4	3	3	0	0	1	0	0	0	0	0	0	0	0	0	0	1	33	14	30	3	7	10	62	68	28	33	38	29	40	35	27	17	13	5	52	0	0	0	0	0	0	0
1530	49	2	4	2	3	1		1	1	0	0	0	0	0	0	0	0	0	0	0	0	0	0	44	16	60	3	4	10	78	85	35	36	42	31	42	35	31	23	1	1	41	0	0	0	0	0	0	0
1531	61	1	1	2	3	4	4	4	3	1	1	0	0	1	0	0	0	0	0	1	0	0	1	28	13	25	2	9	6	40	48	14	11	26	23	22	14	23	17	21	13	19	0	0	0	0	0	0	0
1532	54	2	1	2	2	1		3	3	0	0	0	0	0	0	0	0	0	0	0	0	0	0	33	11	36	4	14	11	51	47	25	17	37	20	31	19	20	11	7	9	21	0	0	0	0	0	0	0
1533	49	2	4	1	3	4	4	4	2	0	0	0	0	0	0	0	0	0	0	0	0	0	0	43	16	54	14	7	10	71	86	31	36	43	31	42	28	30	20	6	6	37	0	0	0	0	0	0	0
1534	46	1	1	3	3	4	4	4	4	0	0	1	0	0	0	0	0	0	0	0	0	0	1	39	14	48	5	4	8	66	70	27	31	38	28	31	29	28	17	8	4	41	0	0	0	0	0	0	0
1535	66	2	1	3	2	1		3	2	0	0	1	0	0	0	0	0	0	0	0	0	0	1	36	15	53	7	7	9	53	47	22	25	26	23	26	25	22	15	12	8	28	0	0	0	0	0	0	0
1536	55	2	2	6	3	3	3	1	1	0	0	0	0	0	0	0	0	0	1	0	0	0	1	35	13	35	2	17	6	50	47	28	27	38	24	31	21	19	21	7	9	28	0	0	0	0	0	0	0
1537	48	2	4	3	3	3	4	3	2	0	0	0	0	1	0	0	0	0	0	0	0	0	1	29	12	28	0	9	7	37	50	23	18	39	25	29	18	25	14	12	13	26	0	0	0	0	0	0	0
1538	44	2	1	3	3	4	4	3	4	0	0	0	0	0	0	0	0	0	0	0	0	0	0	41	16	51	7	8	8	66	67	27	35	27	26	37	29	26	25	19	3	46	0	0	0	0	0	0	0
1539	58	1	1	3	3	4	4	3	3	0	0	0	0	0	0	0	0	0	0	0	0	0	0	48	13	60	12	5	10	61	54	26	21	37	23	37	30	31	19	3	4	21	0	0	0	0	0	0	0
1540	54	2	1	3	3	4	3	3	3	0	0	1	0	0	0	0	0	0	0	0	0	0	1	39	15	56	8	9	9	77	78	34	34	39	29	36	34	32	23	3	6	36	0	0	0	0	0	0	0
1541	52	2	1	3	3	1		4	4	0	0	0	0	0	0	0	0	0	0	0	0	0	0	48	16	56	4	6	8	68	65	34	27	35	31	29	36	24	19	1	3	45	0	0	0	0	0	0	0
1542	48	2	1	3	1	4	2	3	3	0	0	1	0	0	0	0	0	0	0	0	0	0	1	38	14	55	12	8	9	63	76	21	31	41	24	37	28	27	14	10	8	39	0	0	0	0	0	0	0
1543	49	2	2	4	3	4	3	3	3	0	0	0	0	0	0	0	0	0	0	0	0	0	0	44	16	55	4	4	8	74	75	31	36	33	27	42	35	34	21	4	1	57
1544	54	1	1	3	3	4	4	3	4	0	0	0	0	0	0	0	0	0	0	0	0	0	0	49	16	58	15	6	11	76	68	35	29	34	30	29	36	33	21	6	2	32	0	0	0	0	0	0	0
1545	45	2	1	3	3	4	4	3	3	1	0	0	0	0	0	0	0	0	0	0	0	0	1	42	15	54	2	5	8	65	78	34	29	36	28	32	35	28	17	3	4	45	0	0	0	0	0	0	0
1546	48	2	1	3	3	4	4	2	4	0	0	0	0	0	0	0	0	0	0	0	0	1	1	41	16	60	7	6	11	69	83	36	36	39	31	42	36	32
1547	51	2	2	4	2	4	2	4	2	0	0	1	0	0	0	0	0	0	0	0	0	0	1	42	15	57	3	5	10	61	70	30	31	36	27	25	28	16	19	2	7	46
1548	51	1	1	3	2	4	2	2	3	1	0	0	0	0	0	0	0	0	0	0	0	0	1	41	15	60	8	19	7	70	74	32	31	38	30	38	36	28	11	6	15	35	0	0	0	0	0	0	0
1549	47	2	1	2	2	1		2	2	0	0	1	0	0	0	0	0	0	0	0	0	0	1	33	14	58	8	8	12	76	68	30	27	32	29	42	32	33	19	12	5	9
1550	48	1	4	3	3	4	3	4	4	0	0	1	0	0	0	0	0	0	0	0	0	0	1	42	13	58	0	15	10	56	58	24	25	36	22	40	32	28	18	6	6	49
1551	43	2	4	3	3	4	4	4	4	0	0	0	0	0	0	0	0	0	0	0	0	0	0	22	12	23	2	9	7	57	69	26	29	24	27	36	26	22	18	10	4	45	0	0	0	0	0	0	0
1552	46	1	1	3	3	4	4	3	4	0	0	0	0	0	0	0	0	0	0	0	0	0	0	49	15	60	3	7	9	64	65	30	25	40	27	34	33	30	21	5	8	30
1553	44	1	4	1	3	4	2	3	3	0	0	0	0	0	0	0	0	0	0	0	0	1	1	41	16	58	7	6	10	72	69	30	32	40	31	42	35	29	20	1	5	40	0	0	0	0	0	0	0
1554	48	2	2	4	1	4	2	2	2	0	1	0	1	0	0	0	0	0	0	0	0	0	1	15	6	32	0	20	6	51	44	17	6	30	24	30	19	19	7	41	18	27	0	0	0	0	0	0	0
1555	47	2	2	4	2	4	2	2	3	0	0	0	0	0	0	0	0	0	0	0	0	0	0	48	16	60	9	5	11	73	88	36	36	36	31	42	36	28	18	0	1	48	0	0	0	0	0	0	0
1556	57	2	1	3	2	4	2	4	3	0	0	0	0	0	0	0	0	0	0	0	0	0	0	31	12	31	4	13	5	62	69	30	21	33	25	29	26	27	14	10	5	38
1557	46	2	1	3	3	4	2	3	2	0	0	0	0	0	0	0	0	0	0	0	0	0	0	42	13	43	13	12	7	63	60	29	13	40	29	35	34	33	11	22	9	22	0	0	0	0	0	0	0
1558	55	2	2	4	3	2		2	2	1	0	0	0	0	0	0	0	0	0	0	0	1	1	42	14	19	5	6	8									20					0	0	0	0	0	0	0
1559	47	2	4	3	1	4	4	3	3														0						5	58	60	28	22	32	27	39	31	26
1560	44	2	1	3	3	4	2	3	3	0	0	0	0	0	0	0	0	0	0	0	0	0	0	44	16	51	1	5	8	67	70	35	33	38	31	39	36	31	14	0	4	39
1561	50	2	1	3	3	4	4	4	4	0	0	1	0	0	0	0	0	0	0	0	0	0	1	43	15	43	3	12	8	52	71	25	19	28	23	32	24	24	18	6	5	40	0	0	0	0	0	0	0
1562	51	2	1	3	3	4	4	4	4	0	0	1	0	0	0	0	0	0	0	0	0	0	1	42	12	51	8	11	9	59	72	30	33	32	29	39	31	21	19	12	7	48	0	0	0	0	0	0	0
1563	44	1	4	3	3	4	4	4	4	0	0	0	0	0	1	0	0	0	0	0	0	0	1	40	12	49	6	14	8	65	75	30	26	34	26	31	33	25	17	19	4	33	0	0	0	0	0	0	0
1564	53	1	1	3	2	4	2	3	3	1	0	1	0	0	0	0	0	0	0	0	0	0	1	38	11	51	5	13	8	73	76	34	31	35	31	37	35	33	15	4	8	45
1565	52	2	1	3	2	4	2	4	2	0	0	0	0	1	0	0	0	0	0	0	0	0	1	38	15	54	10	5	8	64	76	27	31	35	26	30	29	25	15	5	5	40	0	0	0	0	0	0	0
1566	63	1	2	5	3	4	3	4	2	0	0	0	0	0	0	0	0	0	0	0	0	0	0	42	16	59	11	7	11	71	81	30	27	39	31	39	34	27	18	0	2	31	0	0	0	0	0	0	0
1567	63	2	1	3	3	4	3	3	3	1	0	1	1	0	0	0	0	0	0	0	0	0	1	35	16	58	2	9	6	58	74	31	30	38	28	35	30	23	18	5	8	41	0	0	0	0	0	0	0
1568	62	1	1	2	3	4	4	4	3	0	0	0	0	0	0	0	0	0	0	0	0	0	0	38	15	54	8	5	12	73	79	29	34	37	28	36	35	24	16	17	5	25
1569	54	1	1	3	3	4	4	4	3	0	0	0	0	0	0	0	0	0	0	0	0	0	0	41	16	47	8	12	10	71	71	28	30	36	26	37	29	30	23	10	7	44	0	0	0	0	0	0	0
1570	61	2	1	3	2	4	2	3	3	0	0	1	1	0	0	0	0	0	1	0	0	0	1	29	14	55	3	6	7	48	72	33	35	42	30	42	35	31	14	3	3	39
1571	43	1	4	2	3	4	4	4	3	0	0	1	0	0	0	0	0	0	0	0	0	0	1	36	16	59	1	7	7	63	68	29	29	32	27	25	26	23
1572	48	1	4	2	3	3	4	3	4	0	0	0	0	0	0	0	0	0	0	0	0	0	0	46	16	47	5	4	9	61	68	28	21	37	29	33	29	27	11	2	1	33	0	0	0	0	0	0	0
1573	46	2	4	2	3	4	3	4	4	0	0	0	0	0	0	0	0	0	0	0	0	0	0	45	15	54	4	5	7	75	75	29	31	29	28	39	29	28	22	9	5	37	0	0	0	0	0	0	0
1574	55	2	1	3	2	1		4	4	0	0	0	0	0	0	0	0	0	0	0	0	0	0	46	14	59	9	14	6	73	69	35	34	40	27	37	36	26	18	10	9	45	0	0	1	0	0	0	0
1575	56	2	1	3	3	4	3	4	3	0	0	0	0	0	0	0	0	0	0	0	0	0	0	41	15	58	5	6										30
1576	47	2	4	1	3	4	4	4	3	0	0	0	0	0	0	0	0	0	0	0	0	0	0	38	14	56	6	10										20
1577	59	2	1	3	3	4	4	3	3	0	0	1	0	0	0	0	0	0	0	0	0	0	1	39	13	57	2	7										33
1578	53	1	1	3	1	4	2	4	3	1	0	0	0	0	0	0	0	0	1	0	0	0	1	33	14	45	0	8										27
1579	43	1	1	3	1	4	1	3	3	0	0	0	0	0	0	0	0	0	0	0	0	0	0	41	15	52	7	7										25
1580	51	2	2	3	2	1		3	3	0	0	1	0	0	0	0	0	0	0	1	0	0	1	38	13	54	10	14										21
1581	45	1	1	3	1	4	2	3	3	0	0	0	0	0	0	0	0	0	0	0	0	0	0	41	15	52	6	10										23
1582	47	1	1	3	2	4	3	2	3	1	0	0	0	0	0	0	0	0	0	0	0	0	1	40	13	37	6	5										19
1583	55	1	1	3	3	4	4	4	4	0	0	0	0	0	0	0	0	0	0	0	0	0	0	37	15	58	5	8										32
1584	44	2	1	3	3	4	4	2	3	0	0	0	0	0	0	0	0	0	0	0	0	0	0	38	11	27	0	8										30
1585	45	1	2	1	3	4	4	3	3	0	0	1	0	0	0	0	0	0	0	0	0	0	1	31	13	49	14	13										23
1586	51	1	1	2	2	4	2	1	4	0	0	0	0	0	0	0	0	0	0	0	0	0	0	44	16	58	8	4										33
1587	51	2	2	4	3	4	3	2	3	0	0	0	0	0	0	0	0	0	0	0	0	0	0	31	13	50	4	5										28
1588	62	1	1	3	2	4	2	2	4	0	0	0	0	1	0	0	0	0	1	0	0	0	1	29	13	32	4	9										25
1589	41	2	4	2	3	4	4	3	3	0	0	0	0	0	1	0	0	0	0	0	0	0	1	36	14	53	12	8		64	67	28	30	33	28	34	27	28			8	36
1590	46	1	1	3	2	4	2	3	3	0	0	0	1	0	0	0	0	0	0	0	0	0	1	42	14	52	5	8										20
1591	50	2	1	3	1	1		2	3	0	0	0	0	0	0	0	0	0	0	0	0	0	0	30	16	37	7	9										28
1592	54	2	2	5	2	1		3	2	0	0	0	0	1	0	0	0	0	0	1	0	0	1	30	12	37	0	11										27
1593	58	2	3	4	3	4	4	2	3	0	0	1	0	0	0	0	0	0	0	0	0	0	1	36	14	43	6	10										28
1594	59	2	2	4	1	4	2	4	2	0	0	1	0	1	0	0	0	0	0	0	0	0	1	35	13	59	6	9										21
1595	50	1	2	1	3	1		3	2	0	0	0	0	0	0	0	0	0	1	0	0	0	1	38	12	53	5	6										19
1596	56	2	1	3	2	4	2	2	3	0	0	0	0	0	0	0	0	0	0	0	0	0	0	29	10	37	2	11										24
1597	47	1	1	3	3	3	3	3	4	0	0	0	0	0	0	0	0	0	0	0	0	0	0	41	14	55	6	7										33
1598	62	1	1	3	3	4	4	3	4	0	0	1	0	0	0	0	0	0	0	0	0	0	1	44	16	60	1	4										34
1599	62	2	4	1	2	4	2	3	3	0	0	1	0	0	0	0	0	0	0	0	0	1	1	32	15	60	6	6										15
1600	44	2	4	6	3	1		4	2	0	0	0	0	0	0	0	0	0	0	0	0	0	0	32	11	57	8	17										20
1601	44	2	1	3	3	4	3	4	3	0	0	0	0	0	0	0	0	0	0	0	0	0	0	29	9	41	2	10										21
1602	57	2	1	3	1	4	1	2	3	0	0	0	0	0	0	0	0	0	0	0	0	0	0	34	15	50	3	4										28
1603	54	1	1	3	3	4	4	2	4	0	0	0	0	1	0	0	0	0	0	0	0	0	1	44	16	59	14	7										30
1604	55	1	1	3	2	4	2	3	3	0	0	0	0	0	0	0	0	0	0	0	0	0	0	42	15	57	8	9										20
1605	52	2	4	1	3	4	4	2	3	0	0	0	0	0	0	0	0	0	0	0	0	0	0	39	12	48	1	9	9	59	64	28	28	26	25	33	25	21	20	5	2	36	0	0	0	0	0	0	0
1606	66	2	1	2	3	2		3	3	0	0	1	0	0	0	0	0	0	0	0	0	0	1	42	14	44	12	6	12	71	81	31	32	32	30	36	35	29	15	9	6	19	0	0	0	0	0	0	0
1607	44	1	4	1	3	4	3	3	2	0	0	0	0	0	0	0	0	0	0	0	0	0	0	36	14	48	6	24	11	48	56	18	16	35	23	27	17	20	13	12	6	19	0	0	0	0	0	0	0
1608	54	1	4	6	3	1		2	1	0	0	0	0	0	0	0	0	0	0	0	0	0	0	34	14	50	6	11	11	61	48	21	14	23	25	31	28	31	21	18	4	32	0	0	0	0	0	0	0
1609	65	1	1	2	3	3	3	3	3	1	0	0	0	0	0	0	0	0	0	0	0	0	1	33	12	38	1	5	11	68	78	33	31	36	30	37	36	31	19	2	1	44
1610	57	2	1	2	3	4	2	4	3	0	0	0	0	0	0	0	0	0	0	0	0	0	0	41	15	50	6	5	9	64	59	19	29	29	24	31	21	17	11	15	8	42	0	0	0	0	0	0	0
1611	52	2	1	3	2	4	2	2	3	1	0	1	0	0	1	0	0	0	0	0	0	0	1	40	13	52	8	5	5	46	64	19	21	32	23	35	25	33	14	6	4	19
1612	57	2	2	4	3	4	3	4	2	1	0	0	0	0	0	0	0	0	0	0	0	0	1	31	15	44	2	7	7									23
1613	61	2	1	2	3	4	4	3	3	0	0	0	0	0	0	0	0	0	0	0	0	0	0	39	16	57	6	7	8	70	76	33	33	44	32	42	33	30	20	2	4	39	0	0	0	0	0	0	0
1614	47	2	1	3	2	3	2	2	3	0	0	0	0	0	0	0	0	0	0	0	0	0	0	40	15	56	2	6	2	60	80	32	35	35	32	36	34	34	12	8	10	33	0	0	0	0	0	0	0
1615	48	2	1	3	3	4	2	3	3	0	0	1	0	1	0	0	0	0	0	0	0	0	1	25	9	48	0	7	7	55	60	32	23	35	26	29	28	22			4	40
1616	54	2	4	6	3	4	3	4	3	0	0	0	0	0	0	0	0	0	0	0	0	0	0	40	16	57	7	5	12	64	72	28	34	39	29	42	30	28	23	1	4	44	0	0	0	0	0	0	0
1617	51	2	1	2	2	4	1	4	4	0	0	0	0	0	0	0	0	0	0	0	0	0	0	34	13	50	9	13	10	61	63	21	28	34	21	40	29	25	17	18	7	42	0	0	0	0	0	0	0
1618	56	1	1	3	3	4	4	3	3	0	0	0	0	0	1	0	0	0	0	0	0	0	1	37	14	50	8	8	7	58	60	29	24	40	28	28	30	23	12	8	7	21
1619	49	1	4	1	2	3	2	2	2	0	0	0	0	0	1	0	0	0	1	0	0	0	1	29	13	53	3	17	7	57	51	21	33	38	20	35	31	31	16	22	14	37
1620	52	2	1	3	3	4	3	4	3	0	0	0	0	0	0	0	0	0	0	0	0	0	0	28	10	36	7	12	7	39	40	24	32	33	19	25	14	14	17	19	8	35	0	0	0	0	0	0	0
1621	49	2	1	2	3	4	3	2	3	0	0	0	0	0	0	0	0	0	0	0	0	0	0	46	13	56	3	8	8	69	76							25	21	1	3	37
1622	55	2	3	4	3	4	4	3	3	0	0	1	0	0	0	0	0	0	0	0	0	0	1	47	14	53	10	6	9	71	81	31	35	39	21	36	35	31	18	6	5	41	0	0	0	0	0	0	0
1623	64	2	2	1	3	2		3	2	1	0	0	0	1	0	0	0	0	0	0	0	0	1	30	13	39	7	8	10	49	50	23	23	30	26	40	28	23	19	11	12	26	0	0	0	0	0	0	0
1624	48	1	4	3	3	4	3	3	3	0	0	0	0	0	0	0	0	0	0	0	0	0	0	32	14	38	3	7	8	57	67	34	20	44	29	36	17	21	16	7	4	27	0	0	0	0	0	0	0
1625	65	2	3	1	1	2		2	2	0	0	1	0	0	0	0	0	0	0	0	0	0	1	38	16	53	5	5	12	64	80	30	29	30	26	35	31	28	14	5	5	27	0	0	0	0	0	0	0
1626	47	2	2	4	2	4	2	3	2	0	0	0	0	0	0	0	0	0	0	0	0	0	0	37	13	51	2	7	9	67	74	33	31	39	29	42	33	30	18	7	15	44	0	0	0	0	0	0	0
1627	55	2	1	3	3	4	3	2	3	0	0	0	0	0	0	0	0	0	0	0	0	0	0	44	15	55	5	5	9	69	61	30	28	27	23	38	31	27	17	8	6	44
1628	55	1	1	3	3	4	4	2	4	0	0	0	0	0	0	0	0	0	0	0	0	0	0	47	15	57	6	4	11	69	82	32	27	42	32	39	33	31	20	0	5	45
1629	49	2	4	1	3	4	2	4	2	0	0	0	0	0	0	0	0	0	0	0	0	0	0	32	12	47	8	7	11	38	53	9	21	30	21	29	13	18	17	9	5	26	0	0	0	0	0	0	0
1630	57	2	1	2	3	4	4	3	3	0	0	0	0	0	0	0	0	0	0	0	0	1	1	37	13	53	4	7	7	63	69	34	26	34	29	41	32	32	14	17	5	31	0	0	0	0	0	0	0
1631	57	2	1	3	3	4	3	4	2	0	0	0	0	0	0	0	0	0	0	0	0	0	0	44	13	39	3	6	8	67	54	31	29	31	28	38	33	29	21	12	8	35	0	0	0	0	0	0	0
1632	54	1	2	4	3	4	3	2	3	0	0	0	0	0	0	0	0	0	0	0	0	0	0	42	15	59	7	4	7	66	75	30	30	27	26	38	31	31	21	7	7	42	0	0	0	0	0	0	0
1633	58	1	1	3	3	4	3	4	3	0	0	1	0	0	0	0	0	0	0	0	0	0	1	40	15	60	3	7	12	63	76	30	32	42	29	35	30	31	23	3	8	32	0	0	0	0	0	0	0
1634	47	1	1	3	3	4	2	3	3	0	0	0	0	0	0	0	0	0	0	0	0	0	0	48	16	43	13	7	10	61	70	32	27	39	26	28	32	24	15	2	4	39	0	0	0	0	0	0	0
1635	57	2	2	4	3	4	4	4	3	0	0	0	0	0	0	0	0	0	0	0	0	0	0	41	14	60	2	6	11	73	81	32	34	42	32	42	36	31	20	3	9	41	0	0	0	0	0	0	0
1636	52	1	1	3	2	4	2	3	3	0	0	0	0	1	0	0	0	0	0	0	0	0	1	34	12	58	6	8	9	52	58	26	34	40	29	31	27	24	11	13	9	39	0	0	0	0	0	0	0
1637	47	2	1	3	3	3	2	3	3	0	0	0	0	0	0	0	0	0	0	0	0	0	0	43	15	59	2	5	9	61	74	34	31	44	28	30	33	22	20	5	3	33	0	0	0	0	0	0	0
1638	47	2	1	2	2	4	2	3	3	0	0	0	0	0	0	0	0	0	0	0	0	0	0	41	16	60	12	5	11	75	86	31	36	43	30	42	36	27	16	0	2	41	0	0	0	0	0	0	0
1639	54	2	1	3	3	4	3	4	4	0	0	0	0	0	0	0	0	0	0	0	0	0	0	27	10	37	7	11	8	60	69	23	31	27	25	36	31	15	18	8	9	25	0	0	0	0	0	0	0
1640	43	2	4	2	3	1		3	2	0	0	1	0	0	0	0	0	0	0	0	0	0	1	36	16	60	1	12	8	65	55	22	27	40	28	34	27	30	17	3	9	21
1641	64	1	1	2	3	2		2	3	0	1	1	0	0	0	0	0	0	0	0	0	0	1	42	15	55	5	5	9	71	77	30	29	38	26	41	35	31	22	3	3	51	0	0	0	0	0	0	0
1642	54	2	4	5	3	3	2	4	3	0	0	0	0	0	0	0	0	0	0	0	0	0	0	40	14	51	11	5	11	69	74	29	36	41	30	40	35	27	20	8	6	49	0	0	0	0	0	0	0
1643	61	1	2	1	3	4	4	2	3	1	0	0	0	0	0	0	0	0	0	0	0	0	1	38	16	60	10	4	11	71	76	31	26	37	31	38	33	28	20	2	5	43	0	0	0	0	0	0	0
1644	60	2	1	3	3	4	2	2	3	0	0	0	0	0	0	0	0	0	0	0	0	0	0	38	13	44	3	4	10	54	54	20	32	34	25	28	20	21	14	7	2	32
1645	55	2	1	3	3	4	3	4	3	0	0	0	0	0	0	0	0	0	0	0	0	0	0	35	14	49	2	18	7	63	60	27	23	34	25	32	31	21	20	19	7	39
1646	65	2	1	2	3	4	4	3	3	0	0	0	0	0	0	0	0	0	1	0	0	0	1	50	16	60	12	4	11	77	82	35	36	28	31	37	36	32	15	4	3	42	0	0	0	0	0	0	0
1647	61	1	1	3	2	2		2	4	1	0	0	0	0	0	0	0	0	0	0	0	0	1	34	15	43	8	7	9	65	61	25	31	26	25	35	26	27	15	9	7	41	0	0	0	0	0	0	0
1648	45	2	1	3	2	4	2	3	2	0	0	1	0	0	0	0	0	0	0	0	0	0	1	41	12	56	3	5	7	69	84	35	28	32	26	27	35	29	10	4	4	39
1649	56	2	1	3	3	4	4	4	3	1	0	0	0	0	0	0	0	0	0	0	0	0	1	29	13	40	2	16	8	57	72	29	29	35	27	39	33	25	16	9	5	38	0	0	0	0	0	0	0
1650	48	2	4	1	3	4	3	4	3	0	0	0	0	0	1	0	0	0	0	0	0	0	1	25	11	40	0	8	5	40	45	16	21	33	20	24	14	13	15	21	6	18	0	0	0	0	0	0	0
1651	46	1	1	3	2	4	3	3	3	0	0	0	0	0	0	0	0	0	0	0	0	0	0	34	12	37	9	15	12	54	66	28	15	34	26	28	22	18	8	7	6	23	0	0	0	0	0	0	0
1652	44	1	4	5	3	1		3	3	1	0	1	0	0	0	0	0	0	0	0	0	0	1	39	13	57	3	11	8	61	63	24	13	44	29	34	26	19	16	5	5	27	0	0	0	0	0	0	0
1653	47	1	1	3	2	4	4	2	3	0	0	1	0	0	0	0	0	0	0	0	0	0	1	43	13	55	3	5	6	67	67	29	26	28	30	38	33	26	14	7	4	33	0	0	0	0	0	0	0
1654	51	2	2	4	3	4	4	1	2	0	0	0	0	0	0	0	0	0	0	0	0	0	0	40	14	60	8	5	11	64	80	34	34	34	30	39	34	27	19	1	1	39	0	0	0	0	0	0	0
1655	56	2	4	1	3	4	2	4	3	0	0	0	0	1	0	0	0	0	0	0	0	0	1	35	11	46	2	24	5	53	63	22	22	34	28	33	24	18	21	20	14	43	0	0	0	0	0	0	0
1656	62	2	1	3	3	2		3	3	1	0	0	0	0	0	0	0	0	0	0	0	0	1	34	12	42	6	9	6	62	67	24	36	37	23	35	32	18	20	12	8	37	0	0	0	0	0	0	0
1657	61	2	1	3	1	3	2	3	3	0	0	1	0	1	0	0	0	0	0	0	0	0	1	34	14	25	1	16	7	57	57	28	31	33	23	32	27	22	15	5	9	31	0	0	0	0	0	0	0
1658	57	2	2	4	2	4	2	3	2	1	1	1	0	0	0	0	0	0	0	0	0	0	1	38	15	43	4	13	8	68	75	31	33	39	30	41	36	27	13	4	8	35	0	0	0	0	0	0	0
1659	62	2	1	3	3	4	4	3	4	0	0	0	0	0	0	0	0	0	0	0	0	0	0	41	14	53	1	11	10	69	53	30	31	30	29	40	30	31	19	7	4	49	0	0	0	0	0	0	0
1660	44	2	1	3	3	4	3	2	3	0	0	0	0	0	0	0	0	0	0	0	0	0	0	41	15	60	9	5	8	64	72	31	31	41	30	41	36	29	20	1	1	56
1661	44	2	4	1	3	4	3	4	3	0	1	1	0	0	0	0	0	0	0	0	0	0	1	47	15	49	7	4	10	68	78	34	32	39	27	42	34	31	26	7	1	45	0	0	0	0	0	0	0
1662	64	2	1	2	2	1		3	1	0	0	1	0	0	0	0	0	0	0	0	0	0	1	43	16	57	6	6	8	75	88	36	36	43	31	42	36	28	20	0	4	42
1663	59	2	1	3	3	4	3	3	3														0	30	15	42	5	8	10	54	58	19	31	23	23	24	25	19	13	10	5	25	0	0	0	0	0	0	0
1664	62	2	3	6	3	4	3	2	2	0	0	1	0	1	1	0	0	0	0	0	0	0	1	28	8	35	0	14	6	47	58	16	20	29	29	26	28	16	16	11	10	39	0	0	0	0	0	0	0
1665	61	1	4	1	3	4	4	2	3	0	0	1	0	0	0	0	0	0	0	1	0	0	1	34	14	49	9	7	10	63	73	25	28	31	27	40	30	28	16	7	2	40	0	0	0	0	0	0	0
1666	50	1	4	5	0	3	3	3	1	0	0	1	0	1	0	0	0	0	0	0	0	0	1	36	13	53	11	11	14									32
1667	49	2	1	3	3	4	3	2	4	0	0	0	0	0	0	0	0	0	0	0	0	0	0	42	14	58	2	7	11	68	74	32	31	34	29	37	35	26	21	12	4	45	0	0	0	0	0	0	0
1668	58	1	2	1	2	4	2	2	2	0	1	1	0	0	0	0	0	0	0	0	0	0	1	39	15	54	5	5	7	72	78	30	30	40	27	32	30	31	17	1	6	27	0	0	0	0	0	0	0
1669	44	1	1	1	3	3	3	2	1	0	0	0	0	0	0	0	0	0	0	0	0	0	0	32	12	54	4	12	10									29
1670	56	2	1	3	3	4	4	4	4	0	0	0	0	0	0	0	0	0	0	0	0	0	0	41	13	46	3	5	9	68	81	32	34	33	30	37	35	30	23	3	3	46
1671	46	2	4	1	3	3	2	3	1	0	0	0	0	0	0	0	0	0	0	0	0	0	0	48	16	60	4	4	8	58	62	27	20	31	27	31	18	25	15	4	3	22	0	0	0	0	0	0	0
1672	63	2	1	3	3	3	3	3	4	0	0	0	0	0	0	0	0	0	0	0	0	0	0	44	12	60	9	6	8	69	79	26	26	37	29	40	31	20	23	1	4	35
1673	54	2	1	3	3	4	2	3	4	0	0	0	0	0	0	0	0	0	0	0	0	0	0	42	14	55	3	11	6	64	56	30	23	32	25	38	34	23	19	17	8	42
1674	53	1	1	2	1	4	2	3	2	0	0	0	0	1	0	0	0	0	0	1	0	0	1	34	12	39	0	8	11	55	58	21	16	24	24	26	25	23	5	9	6	21
1675	44	1	4	3	3	4	4	3	2	0	0	1	0	0	1	0	0	0	0	0	0	0	1	44	15	59	6	9	4	64	72	35	27	35	27	38	32	26	19	7	6	40	0	0	0	0	0	0	0
1676	65	2	4	1	3	4	3	4	3	1	0	1	0	0	0	0	0	0	0	0	0	0	1	36	15	54	5	7	10	54	62	18	18	26	21	27	22	24	19	13	8	35
1677	57	1	2	1	2	4	1	2	2	0	0	1	0	0	0	0	0	0	0	1	0	0	1	33	15	55	4	6	9	52	65	15	33	44	29	35	26	26	11	10	6	19	0	0	0	0	0	0	0
1678	56	2	4	3	3	4	4	3	4	0	0	0	0	0	0	0	0	0	0	0	0	0	0	40	14	48	1	10	7	55	76	29	32	29	29	42	32	31	18	5	5	33	0	0	0	0	0	0	0
1679	61	2	4	6	2	4	2	4	2	0	0	1	0	1	1	0	0	0	0	1	0	0	1	30	12	42	5	10	9	56	64	21	27	29	23	30	25	21	18	16	7	42	0	0	0	0	0	0	0
1680	54	2	1	3	3	4	4	4	4	0	0	0	0	0	0	0	0	0	0	0	0	0	0	41	14	55	6	7	11	65	58	28	28	31	27	39	29	31	20	9	4	40	0	0	0	0	0	0	0
1681	53	2	1	3	2	4	2	4	3	0	0	1	0	0	0	0	0	0	0	0	0	0	1	42	12	49	5	8	7	59	45	20	28	43	23	28	27	24
1682	43	2	4	3	3	4	4	2	2	0	0	0	0	0	0	0	0	0	0	0	0	0	0	47	16	56	4	6	8	65	80	30	31	36	31	41	33	26	14	7	2	28
1683	59	1	1	3	3	4	4	4	4	1	0	0	0	0	0	0	0	0	0	0	0	1	1	43	15	56	4	7	10	62	62	32	20	37	27	39	31	28	22	4	6	37	0	0	0	0	0	0	0
1684	60	2	4	2	3	4	4	1	3	1	0	1	0	1	0	0	0	0	0	0	0	0	1	39	16	54	5	10	12	61	73	29	36	38	26	35	32	27	23	5	5	43
1685	46	2	1	3	2	4	2	3	3	1	0	0	0	1	0	0	0	0	0	0	1	0	1	33	12	50	0	23	10	52	59	25	20	39	22	37	14	17	14	32	14	46
1686	47	2	1	3	3	4	3	2	3	0	0	0	0	0	0	0	0	0	0	0	0	0	0	50	16	57	4	5	12	68	79	35	30	44	31	35	34	25	18	0	2	46	0	0	0	0	0	0	0
1687	54	1	1	3	3	4	4	3	3	0	0	0	0	0	0	0	0	0	0	0	0	0	0	38	12	38	4	17	7	47	59	22	16	36	21	30	29	31	20	18	16	28
1688	47	2	1	3	3	4	4	4	3	0	0	0	0	0	0	0	0	0	0	0	0	0	0	37	16	50	0	6	9	48	65	22	33	39	25	24	21	30	20	5	3	43
1689	45	1	4	1	2	4	1	4	2	0	0	0	0	0	0	0	0	0	0	0	0	0	0	35	13	52	9	10	9	60	68	25	21	36	29	35	18	23	11	6	6		0	0	0	0	0	0	0
1690	62	2	1	3	3	4	4	4	3	0	0	0	1	0	0	0	0	0	0	0	0	0	1	40	13	58	2	5	12	65	61	27	19	32	23	30	26	29	15	8	4	23	0	0	0	0	0	0	0
1691	64	2	1	2	2	3	2	2	3	1	0	0	0	0	0	0	0	0	0	0	0	0	1	44	14	49	4	8	11	48	53	21	34	22	20	27	17	22	10	10	3	36	0	0	0	0	0	0	0
1692	66	1	1	2	2	4	2	2	3	1	0	1	0	0	0	0	0	0	0	0	0	0	1	42	13	43	7	4	8	61	72	29	32	35	26	30	31	27	14	6	6	35	0	0	0	0	0	0	0
1693	60	2	1	3	2	4	2	2	1	0	1	1	0	0	1	0	0	0	0	0	0	0	1	22	10	12	2	14	5	47	38	15	32	25	23	29	13	25	12	31	8	45
1694	62	1	1	2	2	1		4	2	1	0	0	0	0	0	0	0	0	1	0	0	0	1	39	16	60	3	4	6	57	56	22	18	29	24	35	28	29	17	12	6	21	0	0	0	0	0	0	0
1695	59	1	1	3	3	4	4	4	4	0	0	0	0	0	0	0	0	0	0	0	0	0	0	41	14	56	4	5	4	54	66	30	32	30	30	34	33	30	13	2	3	43
1696	53	1	1	3	3	4	4	4	4	0	0	0	0	0	0	0	0	0	0	0	0	0	0	43	14	52	6	13	9	55								21
1697	57	2	1	3	3	4	3	4	4	0	1	1	0	0	0	0	0	0	0	0	0	0	1	47	16	58	8	6	8	72	76	35	32	30	29	39	36	34	25	2	5	34
1698	46	2	1	3	1	4	2	2	3	0	0	0	0	0	0	0	0	0	0	0	0	0	0	42	13	50	8	11	6	63	69	34	22	36	31	41	30	26	8	8	6	29	0	0	0	0	0	0	0
1699	54	2	4	3	3	4	4	3	3	0	0	0	0	0	0	0	0	0	0	0	0	0	0	30	14	38	0	7	11	66	69	28	34	33	32	37	24	29	18	2	4	41
1700	45	2	1	3	3	1		4	3	0	0	0	0	1	0	0	0	0	0	0	0	0	1	37	13	55	2	8	9	48	62	24	35	35	27	38	22	32	18	25	6	42	0	0	0	0	0	0	0
1701	51	2	4	5	2	4	2	4	2	0	0	1	0	0	0	0	0	0	0	0	0	0	1	26	12	30	10	5	6	55	61	21	36	25	33	26	21	34	13	39	4	48
1702	46	2	4	3	3	4	4	4	3	0	0	0	0	0	0	0	0	0	0	0	0	0	0	41	14	49	4	11	9	59	66	29	34	28	26	30	31	29	19	5	6	47	0	0	0	0	0	0	0
1703	52	2	1	3	3	4	4	3	4	0	0	0	0	0	0	0	0	0	0	0	0	0	0	43	14	42	10	9	8	53	74	36	30	43	33	41	36	20	20	7	8	26
1704	43	1	4	2	1	2		2	2	0	0	0	0	0	0	0	0	0	0	0	1	0	1	38	14	58	12	19	6	41	46	17	12	29	21	22	19	19	14	7	9	21
1705	53	2	2	2	1	4	2	2	3	0	0	1	0	0	0	0	0	0	0	0	0	0	1	40	15	41	0	6	7	47	66	30	9	28	28	25	19	18
1706	44	2	1	3	3	4	3	2	3	0	0	0	0	0	0	0	0	0	0	0	0	0	0	38	15	40	1	9	8	45	49	18	22	34	18	24	17	24	17	13	6	34
1707	44	2	1	3	1	1		3	3	0	0	0	0	1	0	0	0	0	0	0	0	0	1	31	14	34	8	16	7	67	72	28	22	38	29	26	29	21	11	16	9	31	0	0	0	0	0	0	0
1708	61	1	1	3	2	4	4	3	4	0	0	0	0	0	0	0	0	0	1	0	0	0	1	44	16	53	13	10	11	67	86	29	34	39	29	33	36	29	14	0	4	31	0	0	0	0	0	0	0
1709	60	1	1	3	3	1		3	2	1	0	0	1	1	0	0	0	0	1	0	0	0	1	30	14	42	4	4	10	61	66	29	36	23	26	40	30	28	16	7	1	40	0	0	0	0	0	0	0
1710	44	2	4	3	3	4	3	2	3	0	0	0	0	0	0	0	0	0	0	0	0	0	0	35	14	48	5	5	10	56	54	23	19	22	22	27	27	30	15	17	3	24
1711	56	2	2	1	3	4	3	2	1	0	0	1	0	0	0	0	0	0	0	0	0	0	1	45	16	56	2	9	10	57	71	34	35	38	27	39	27	26	24	0	1	33	0	0	0	0	0	0	0
1712	61	2	3	4	3	4	3	4	4	0	0	0	0	0	0	0	0	0	0	0	0	0	0	40	16	56	8	4	7	73	68	32	27	39	31	42	36	30	12	0	3	48	0	0	0	0	0	0	0
1713	50	1	4	1	3	4	3	4	2	0	0	0	0	0	0	0	0	0	0	0	0	0	0	34	13	50	5	11	5	63	53	24	13	39	23	34	29	26	16	3	6	16	0	0	0	0	0	0	0
1714	55	1	1	2	2	4	2	4	3	0	0	1	0	0	0	0	0	0	0	0	0	0	1	36	16	59	0	4	8									23
1715	50	2	2	1	2	3	2	4	1	0	0	0	0	1	0	0	0	0	0	0	0	0	1	43	14	41	10	9	10	46	53	21	21	29	23	26	18	20			7	28
1716	50	2	1	2	2	4	2	3	3	0	0	0	0	0	0	0	0	0	0	0	0	0	0	43	16	60	4	6	9	66	78	32	34	43	31	41	34	30	15	1	2	44	0	0	0	0	0	0	0
1717	64	1	1	2	3	4	4	3	4	1	0	0	0	0	0	0	0	0	0	0	0	0	1	41	16	59	6	7	10	64	85	35	34	35	31	42	36	33	23	1	3	34	0	0	0	0	0	0	0
1718	45	1	2	4	3	4	4	3	3	0	0	0	0	0	0	0	0	0	0	0	0	0	0	41	15	56	8	8	8	69	81	36	35	39	31	35	35	26	15	5	6	31	0	0	0	0	0	0	0
1719	65	2	1	2	2	2		4	2	0	0	1	0	1	0	0	0	0	0	0	0	0	1	39	16	54	12	7	9	70	80	33	36	37	31	39	33	33	21	5	8	52
1720	44	2	4	1	3	4	3	3	2	0	0	1	1	0	0	0	0	0	0	0	0	0	1	33	16	55	3	7	9	67	79	33	35	42	28	34	34	22	22	0	2	45	0	0	0	0	0	0	0
1721	64	2	1	2	2	2		2	3	1	0	0	0	0	0	0	0	0	0	0	0	0	1	33	15	48	3	7	10	74	74	33	35	40	27	39	36	24	20	2	4	37
1722	50	2	1	3	3	4	4	4	4	0	0	0	0	0	0	0	0	0	0	0	0	0	0	46	16	56	5	5	11	68	86	35	35	34	30	29	36	30	21	0	2	45
1723	46	2	1	3	3	4	4	3	4	0	0	0	0	0	0	0	0	0	0	0	0	0	0	41	16	59	6	6	11	68	58	28	28	27	23	41	31	25	14	4	6	34	0	0	0	0	0	0	0
1724	59	2	4	4	3	4	3	3	3	0	0	0	0	0	0	0	0	0	0	0	0	0	0	38	14	60	7	5	7	46	68	31	30	41	29	38	35	24	20	6	4	31	0	0	0	0	0	0	0
1725	57	1	1	2	3	4	3	2	3	1	0	0	0	0	0	0	0	0	0	0	0	0	1	34	11	41	2	10	7	45	51	18	24	25	22	32	24	24	20	17	8	47	0	0	0	0	0	0	0
1726	66	1	2	2	3	2		2	3	1	0	1	0	0	0	0	0	0	0	0	0	0	1	45	16	55	12	9	11	72	79	29	22	38	26	37	29	24	13	3	4	23	0	0	0	0	0	0	0
1727	57	2	2	2	3	4	3	2	4	0	0	1	0	0	0	0	0	0	0	0	0	0	1	34	8	52	4	10	11	71	43	27	21	38	27	41	33	23	20	3	4	31	0	0	0	0	0	0	0
1728	57	2	1	2	3	4	2	2	2	0	0	0	0	0	0	0	0	0	0	0	0	0	0	29	12	46	6	11	9	59	73	30	24	30	24	35	28	29	18	13	10	43
1729	62	2	1	2	3	4	3	4	3	0	1	0	0	0	0	0	0	0	0	0	0	0	1	33	13	41	5	6	9	72	84	29	30	33	29	30	34	24	18	1	1	49	0	0	0	0	0	0	0
1730	53	2	2	4	3	4	3	3	2	0	0	0	0	0	0	0	0	0	0	0	0	0	0	41	15	56	4	8	11	68	81	31	30	37	29	42	33	32	17	1	5	42	0	0	0	0	0	0	0
1731	64	2	1	2	3	2		3	3	1	1	0	0	0	0	0	0	0	0	1	0	0	1	37	15	47	6	13	10	63	68	28	27	34	29	35	31	27	13	12	9	35
1732	52	2	2	1	2	3	1	4	2	0	0	0	0	0	0	0	0	0	0	0	0	0	0	30	14	38	5	6	5	52	30	12	26	33	22	17	12	12	12	18	3	14	0	0	0	0	0	0	0
1733	51	2	2	4	2	4	2	3	2	0	0	0	0	0	0	0	0	0	0	1	0	0	1	31	15	56	7	6	6	52	62	29	31	37	30	35	30	25	18	3	3	35
1734	51	2	3	1	2	3	1	2	1	0	0	0	0	0	0	0	0	0	0	0	0	0	0	47	15	52	7	9	9	62	78	34	36	38	30	42	26	23	18	2	5	38
1735	65	2	1	2	3	2		4	3	0	0	0	0	0	0	0	0	0	0	0	0	0	0	42	16	59	8	5	9	59	74	32	35	32	29	30	36	21	23	2	6	48	0	0	0	0	0	0	0
1736	51	1	4	2	3	4	4	4	3	0	0	0	0	0	0	0	0	0	0	0	0	0	0	39	15	60	6	4	8	64	74	31	30	36	26	35	26	28	21	0	6	41	0	0	0	0	0	0	0
1737	60	1	3	4	2	1		3	1	1	0	0	0	1	0	0	0	0	0	0	0	0	1	32	12	46	10	7	11									26
1738	57	2	1	2	3	4	3	3	3	0	0	0	0	0	0	0	0	0	0	0	0	0	0	36	13	47	6	10	11	65	58	24	22	25	21	28	28	27	17	10	10	37	0	0	0	0	0	0	0
1739	66	2	2	4	3	2		2	3	0	0	1	0	0	0	0	0	0	0	0	0	0	1	32	15	45	7	10	11	68	79	25	31	38	29	31	24	27	24	3	5	36	0	0	0	0	0	0	0
1740	48	2	4	3	3	4	4	4	3	0	0	1	0	0	0	0	0	0	0	0	0	0	1	42	14	57	9	6	9	51	76	34	28	40	29	38	30	27	14	2	4	24
1741	52	1	1	3	3	4	4	3	4	0	0	0	0	0	0	0	0	0	0	0	0	0	0	39	16	54	10	6	9	72	84	31	32	36	30	34	35	20	17	4	4	32	0	0	0	0	0	0	0
1742	60	1	2	4	3	4	3	3	3	0	0	0	0	0	0	0	0	0	0	0	0	0	0	42	14	55	5	5	7	63	60	30	25	36	26	36	27	26	12	1	6	35
1743	53	2	2	4	3	1		2	1	0	0	0	0	0	0	0	0	0	0	0	0	0	0	34	15	60	5	7	10	68	73	17	11	43	32	33	19	16	20	0	2	28	0	0	0	0	0	0	0
1744	54	2	1	3	3	4	3	3	4	0	0	0	0	0	0	0	0	0	0	0	0	0	0	38	11	30	4	13	11	60	57	26	31	29	17	29	17	23	19	4	8	33	0	0	0	0	0	0	0
1745	55	1	4	1	3	4	2	4	1	1	0	1	0	1	0	0	0	0	0	1	0	0	1	33	14	46			7	64	59	31	35	43	32	40	36	25	21	8	8	41	0	0	0	0	0	0	0
1746	60	2	1	2	1	4	2	4	3	0	0	0	1	1	1	0	0	0	0	0	0	0	1	30	14	33	6	8	6	57	51	24	35	31	20	38	27	22	17	11	6	34
1747	51	1	1	3	2	4	1	3	3	0	0	0	0	0	0	0	0	0	0	0	0	0	0	38	13	39	13	6	10	59	51	27	32	34	20	35	31	27	12	21	6	30	0	0	0	0	0	0	0
1748	48	2	1	3	3	1		4	4	0	0	0	0	0	0	0	0	0	0	0	0	0	0	44	15	54	5	4	6	51	69	29	36	27	28	41	27	26	20	5	5	43
1749	54	1	1	3	3	4	3	2	4	0	0	0	0	0	0	0	0	0	0	0	0	0	0	41	13	60	8	5	12	64	74	32	27	40	29	37	36	28	22	1	4	32	0	0	0	0	0	0	0
1750	44	2	1	3	3	3	2	4	3	0	0	0	0	0	0	0	0	0	0	0	0	0	0	40	16	57	1	6	7	63	73	32	27	26	27	40	34	29	18	7	4	22	0	0	0	0	0	0	0
1751	55	2	1	3	3	4	4	4	3	0	0	0	0	0	0	0	0	0	0	0	0	0	0	43	15	51	3	7	11	67	77	35	35	38	30	41	35	28	25	14	9	51	0	0	0	0	0	0	0
1752	61	2	1	2	3	2		4	4	0	1	0	0	0	0	0	0	0	0	0	0	0	1	44	16	53	14	5	7	69	76	29	29	34	30	33	35	30	23	4	5	54	0	0	0	0	0	0	0
1753	52	1	1	3	3	4	4	3	3	0	0	1	0	0	0	0	0	0	0	0	0	0	1	38	14	46	5	5	7	56	61	29	29	32	27	33	29	25	20	4	5	43
1754	45	2	3	2	2	4	2	2	2	0	0	0	0	1	0	0	0	0	0	0	0	0	1	39	14	56	12	9	11	58	82	29	33	29	30	42	33	28	19	7	11	40	0	0	0	0	0	0	0
1755	64	2	4	6	3	2		4	2	0	0	0	0	0	0	0	0	0	0	0	0	0	0	46	16	45	8	8	11	57	67	24	30	30	26	35	27	28	17	1	11	42
1756	63	2	1	3	2	4	2	3	3	0	0	1	0	0	0	0	0	0	1	0	0	0	1	36	13	36	9	6	7	68	56	24	32	30	26	29	32	22	16	15	6	36
1757	46	2	1	2	3	4	3	3	3	0	0	0	0	0	0	0	0	0	0	0	0	0	0	37	14	53	2	11	8	62	55	27	31	37	29	34	31	29	20	6	9	41
1758	59	2	1	3	3	4	3	4	3	0	0	0	0	0	0	0	0	0	0	0	0	0	0	44	15	54	8	5	7	68	84	28	27	32	29	37	35	21	15	10	3	35	0	0	0	0	0	0	0
1759	44	1	1	3	3	4	4	4	4	0	0	1	0	1	0	0	0	0	1	0	0	0	1	46	11	30	10	11	10	74	67	30	31	27	31	41	36	33
1760	52	2	4	6	3	4	2	4	2	0	0	0	0	0	1	0	0	0	0	0	0	0	1	31	14	38	12	6	7	57	50	22	31	34	26	39	21	20	21	9	5	31	0	0	0	0	0	0	0
1761	50	2	1	3	3	4	2	4	3	0	0	0	0	0	0	0	0	0	0	0	0	0	0	37	12	49	5	8	8	56	57	20	26	28	19	27	19	22	17	21	11	30	0	0	0	0	0	0	0
1762	63	2	2	6	3	4	4	4	3	1	0	1	0	0	0	0	0	0	0	0	0	1	1	33	15	60	1	8	10	55	74	24	26	29	33	38	19	24	16	5	6	45
1763	48	2	1	3	3	3	2	4	2	0	0	0	0	0	0	0	0	0	0	0	0	0	0	32	11	49	2	6	10	59	51	29	30	34	25	31	21	16	13	9	6	39	0	0	0	0	0	0	0
1764	43	2	4	4	3	4	3	3	3	0	0	0	0	0	0	0	0	0	0	0	0	0	0	45	14	58	9	5	9	72	75	32	35	40	27	41	34	32	20	3	5	56
1765	66	2	2	1	3	2		3	2	0	0	0	0	1	0	0	0	0	0	0	0	0	1	44	16	57	5	6	11	62	80	30	29	43	28	33	28	25	25	7	6	41
1766	59	1	4	6	3	4	4	4	3	1	0	0	0	0	0	0	0	0	0	0	0	0	1	40	16	60	3	5	10	74	60	26	29	36	28	39	30	33	19	4	7	43	0	0	0	0	0	0	0
1767	56	2	1	3	3	4	3	4	3	0	0	0	0	0	0	0	0	0	0	0	0	1	1	36	15	53	5	7	9	59	62	25	30	35	25	35	26	28	20	24	9	37	0	0	0	0	0	0	0
1768	59	2	1	2	3	4	2	4	4	0	0	0	0	0	0	0	0	0	0	0	0	0	0	38	12	43	6	8	10	53	61	22	35	36	24	28	25	20	20	15	6	37	0	0	0	0	0	0	0
1769	66	1	1	2	3	2		3	3	0	0	0	0	0	0	0	0	0	0	1	0	0	1	30	12	49	7	8	9	59	64	25	25	25	23	35	25	25	15	6	7	29	0	0	0	0	0	0	0
1770	58	2	1	3	2	4	2	4	3	0	0	0	0	0	0	0	0	0	0	0	0	0	0	35	14	59	8	9	9	62	69	30	26	33	23	39	30	25	15	10	4	28	0	0	0	0	0	0	0
1771	61	1	2	3	3	3	3	4	2	0	0	0	0	0	0	0	0	0	0	0	0	0	0	37	14	54	7	10	6	66	51	27	14	40	21	38	30	30	17	13	6	18
1772	63	1	4	1	3	4	2	3	2	1	0	0	0	0	0	0	0	0	0	0	0	0	1	35	16	56	3	8	9	51	66	23	28	36	23	42	20	23	17	12	7	39	0	0	0	0	0	0	0
1773	52	1	1	3	3	4	3	4	3	0	0	0	0	0	0	0	0	0	0	0	0	0	0	41	16	50	2	4	7	62	72	30	26	37	25	34	32	22	21	0	2	32
1774	46	1	4	1	3	3	3	4	1	0	0	0	0	0	0	0	0	0	0	0	0	0	0	37	14	43	9	5	10	52	53	26	31	27	23	34	23	22	21	15	6	37
1775	57	2	1	2	3	4	4	4	4	0	0	1	0	0	0	0	0	0	0	0	0	0	1	40	15	41	10	10	9	64	77	31	32	41	32	42	34	22	18	4	4	41	0	0	0	0	0	0	0
1776	41	1	1	3	3	4	4	2	3	1	1	1	0	0	1	0	0	0	0	0	0	0	1	32	8	19	5	24	8									21
1777	65	2	4	1	3	1		2	1	0	0	1	0	0	0	0	0	0	0	0	0	0	1	34	13	44	8	6	10	53	57	22	23	33	24	24	19	17	18	12	2	30	0	0	0	0	0	0	0
1778	43	1	1	3	3	1		3	3	0	0	0	0	0	0	0	0	0	0	0	0	0	0	47	16	53	7	7	11	23	81	35	31	33	30	41	34	31	22	0	1	36	0	0	0	0	0	0	0
1779	54	2	1	2	1	4	2	3	2	0	0	0	0	0	0	0	0	0	0	0	0	0	0	33	12	60	2	6	6	59	67	29	32	34	21	33	28	29	14	2	5	35
1780	64	2	3	1	2	1		4	1	0	0	0	0	0	0	0	0	0	0	0	0	0	0	35	12	49	0	7	7	49	50	17	25	28	23	20	21	21	11	17	4	18	0	0	0	0	0	0	0
1781	51	1	1	3	3	4	3	1	3	1	0	1	0	0	0	0	0	0	0	0	0	0	1	43	14	54			8	61	64	28	31	33	26	42	31	27	16	5	2	30	0	0	0	0	0	0	0
1782	52	2	1	2	3	4	2	2	3														0	41	15	49	8	4	12	71	81	31	36	40	30	38	34	27	18	10	4	54	0	0	0	0	0	0	0
1783	45	2	4	3	3	4	4	4	4	0	0	0	0	0	0	0	0	0	0	0	0	0	0	40	15	42	5	16	6	65	59	31	27	35	25	34	30	20	26	7	8	43
1784	49	2	2	4	3	4	4	4	3	0	0	0	0	0	0	0	0	0	0	0	0	0	0	33	16	58	3	7	3	58	51	27	25	41	21	32	14	22	20	12	7	33	0	0	0	0	0	0	0
1785	56	2	4	6	3	4	1	4	2	0	0	0	0	0	0	0	0	0	0	0	0	0	0	36	14	48	5	8	8	54	55	22	24	33	29	37	27	24	16	6	5	34	0	0	0	0	0	0	0
1786	59	2	2	3	3	4	3	2	3	0	0	0	0	0	0	0	0	0	0	1	0	0	1	45	16	55	6	7	11	60	62	25	17	38	26	26	27	29	13	9	2	34	0	0	0	0	0	0	0
1787	52	1	4	2	3	4	4	4	2	0	0	1	1	0	0	0	0	0	0	0	0	1	1	42	15	59	8	7	8									30
1788	50	2	4	1	3	4	4	4	2	1	0	0	0	0	0	0	0	0	0	0	0	0	1	45	16	58	7	7	12	61	57	29	14	36	22	32	26	26	21	0	3	15	0	0	0	0	0	0	0
1789	42	2	4	1	3	4	4	4	2	0	0	0	0	0	0	0	0	0	0	0	0	0	0	48	16	60	4	5	7	76	78	35	36	44	31	42	36	27	25	12	1	48	0	0	0	0	0	0	0
1790	54	1	4	6	2	1		4	1	0	0	1	0	0	0	0	0	0	0	0	0	0	1	48	16	51	4	5	5	75	76	36	28	39	28	38	36	27	15	1	5	36	0	0	0	0	0	0	0
1791	62	2	1	2	3	4	3	3	3	0	0	1	0	0	0	0	0	0	0	0	0	0	1	33	12	47	2	7	10	64	50	25	25	30	23	29	30	24	18	1	6	46	0	0	0	0	0	0	0
1792	52	1	1	3	2	4	2	3	3	0	0	0	0	0	0	0	0	0	1	1	0	0	1	32	12	24	4	14	9	55	61	26	25	31	21	29	26	21	12	17	8	39	0	0	0	0	0	0	0
1793	56	2	1	3	3	4	4	2	4	0	0	0	1	0	0	0	0	0	0	0	0	0	1	43	14	48	8	4	11	65	74	31	35	38	31	34	33	30	21	10	2	50	0	0	0	0	0	0	0
1794	48	1	1	3	1	4	2	2	3	1	0	0	0	1	0	0	0	0	0	0	0	0	1	33	14	32	6	16	8	33	59	15	9	29	22	31	13	25	9	14	6	13
1795	50	2	2	5	3	4	2	3	3	0	0	0	0	1	1	0	0	0	0	1	0	0	1	36	14	46	6	11	8	58	59	24	23	35	22	24	22	14	14	2	6	35
1796	44	2	4	1	3	4	4	4	3	0	0	0	0	0	0	0	0	0	0	0	0	0	0	44	15	59	7	6	7	63	65	34	23	37	28	37	32	26	18	6	4	36
1797	53	2	1	3	3	4	3	4	3	0	0	0	0	0	0	0	0	0	0	0	0	0	0	39	14	57	4	8	7	65	66	27	28	35	26	32	30	25	21	6	7	43	0	0	0	0	0	0	0
1798	42	2	1	3	3	1		3	2	0	0	0	0	0	0	0	0	0	0	0	0	0	0	27	10	48	1	16	6	58	56	26	21	39	22	37	29	24	19	24	8	37
1799	49	2	4	3	3	4	3	3	3	0	0	0	0	0	0	0	0	0	0	0	0	0	0	38	12	48	7	10	5	60	65	27	22	28	23	32	28	24	17	14	5	28	0	0	0	0	0	0	0
1800	55	1	2	3	3	4	4	3	3	0	0	0	0	0	0	0	0	0	0	0	0	0	0	42	14	59	5	5	8	64	81	35	28	43	30	42	33	33	20	2	4	35
1801	60	2	1	3	3	4	4	4	3	0	0	0	0	0	0	0	0	0	0	0	0	0	0	31	14	59	0	8	8	63	67	25	26	34	26	35	30	29	14	3	2	36
1802	48	2	2	1	3	3	1	4	1	1	0	0	0	0	0	0	0	0	0	0	0	0	1	27	11	45	7	16	5	44	54	15	28	30	21	30	13	21	17	11	7	36	0	0	0	0	0	0	0
1803	50	2	4	1	3	4	3	4	3	0	0	0	0	0	0	0	0	0	0	0	0	0	0	41	16	57	5	5	10	32	67	30	32	34	29	40	30	31	20	2	3	37	0	0	0	0	0	0	0
1804	49	2	4	3	3	4	4	4	4	1	0	0	0	0	0	0	0	0	0	0	0	0	1	40	13	49	7	6	10	57	65	29	27	33	30	39	30	26
1805	47	2	4	1	3	4	3	4	2	0	0	0	0	0	0	0	0	0	0	0	0	0	0	41	16	56	7	7	10	63	61	31	33	42	27	36	31	30	21	4	4	49
1806	55	1	1	3	3	4	4	3	4	0	0	1	0	0	0	0	0	0	0	0	0	0	1	42	13	58	8	7	10	58	69	23	27	33	23	35	30	31	22	7	5	42
1807	53	2	1	2	3	4	3	2	3	0	0	1	0	0	0	0	0	0	0	1	0	0	1	32	12	24	5	10	8	67	50	25	34	28	27	27	33	26	24	14	10	37
1808	46	2	1	3	3	4	3	2	3	0	0	1	0	0	0	0	0	0	0	0	0	0	1	38	13	38	2	13	7									28			9	37
1809	53	2	4	1	3	3	2	4	2	0	0	0	0	0	0	0	0	0	0	0	0	0	0	44	15	58	7	6	9	74	67	28	31	32	27	33	30	21	23	8	11	38	0	0	0	0	0	0	0
1810	49	2	1	3	3	4	2	1	2	0	0	0	0	0	0	0	0	0	0	0	0	0	0	40	15	59	10	7	10	68	84	34	33	42	29	41	31	27	20	1	4	47	0	0	0	0	0	0	0
1811	59	1	1	3	2	1		3	3	1	0	1	0	1	0	0	0	0	0	0	0	0	1	37	14	53	5	7	10	68	70	31	26	36	28	40	35	21	17	6	5	29	0	0	0	0	0	0	0
1812	56	2	1	3	1	1		3	3	0	0	1	0	1	0	1	0	0	0	1	0	0	1	35	15	44	5	14	10	53	62	30	31	26	28	31	31	26	12	9	5	35	0	0	0	0	0	0	0
1813	52	2	1	3	3	4	2	4	3	0	0	0	0	0	0	0	0	0	0	0	0	0	0	40	15	57	5	7	9	66	74	31	30	30	25	21	31	24	15	5	4	28	0	0	0	0	0	0	0
1814	55	2	1	3	3	3	3	4	4	0	0	0	0	0	0	0	0	0	0	0	0	0	0	41	16	49	7	5	9									26
1815	53	2	1	3	3	4	4	4	3	0	0	0	0	0	0	0	0	0	0	0	0	0	0	33	14	44	2	10	4	48	60	26	33	33	19	33	24	25	14	9	5	30	0	0	0	0	0	0	0
1816	52	2	4	1	3	4	3	3	3	0	0	0	0	0	0	0	0	0	0	0	0	0	0	31	15	56	5	11	10	54	66	19	23	34	25	29	20	21	18	7	8	27	0	0	0	0	0	0	0
1817	46	1	1	3	2	4	2	3	2	0	0	0	0	0	0	0	0	0	0	0	0	0	0	32	13	45	5	13	8	46	49	20	25	21	24	28	20	19	11	5	7	33	0	0	0	0	0	0	0
1818	66	1	2	3	3	4	3	2	3	0	1	1	0	0	0	0	0	0	0	0	0	0	1	42	15	51	6	5	12	56	64	26	19	28	26	34	27	27	14	3	3	24	0	0	0	0	0	0	0
1819	55	2	1	2	2	4	2	3	3	0	0	1	0	0	0	0	0	0	0	0	0	0	1	42	14	51	11	10	12	64	72	30	30	32	29	41	31	28	20	1	4	29
1820	64	2	4	1	3	4	4	3	2	0	0	0	0	0	0	0	0	0	0	0	0	0	0	48	16	57	4	4	7	68	81	33	35	41	30	39	31	26	20	3	2	35	0	0	0	0	0	0	0
1821	57	2	1	3	3	4	4	3	3	1	0	0	0	0	0	0	0	0	0	0	0	0	1	39	13	57	0	13	7	63	74	31	22	35	26	28	29	23	18	32	13	35
1822	57	2	4	4	3	4	2	3	2	0	0	0	0	0	1	0	0	0	0	0	0	0	1	43	15	58	8	5	12	49	57							19			2	26
1823	55	2	1	3	3	1		3	3	0	0	1	0	0	0	0	0	0	0	0	0	0	1	31	11	52	0	9	9	63	65	32	32	40	29	39	34	27	24	19	5	39
1824	66	2	2	1	3	4	3	4	3	0	0	0	0	0	0	0	0	0	0	0	0	0	0	48	16	60	4	8	8	78	83	35	36	42	31	37	36	35	22	0	9	50
1825	54	2	2	4	3	3	4	3	3	0	0	0	0	0	0	0	0	0	0	0	0	0	0	44	15	58	7	4	10	65	82	32	36	40	31	35	34	29	17	2	1	43
1826	56	2	1	3	3	4	4	4	4	0	0	0	0	0	0	0	0	0	0	0	0	0	0	46	15	47	5	9	9	68	55	30	34	32	24	37	32	26	22	11	4	50	0	0	0	0	0	0	0
1827	54	1	1	2	3	4	4	3	4	0	0	0	0	0	0	0	0	0	0	0	0	0	0	47	15	59	6	10	10	57	69	27	28	33	30	40	30	28	24	2	4	37
1828	57	2	1	2	3	4	3	4	2	0	0	1	0	0	0	0	0	0	0	0	0	1	1	34	15	53	4	9	11	61	76	30	31	42	27	37	31	35	22	2	5	47
1829	57	2	4	3	3	4	3	2	3	0	0	0	0	1	0	0	0	0	0	0	0	0	1	41	16	56	3	10	9	68	78	29	34	40	29	35	30	30	19	9	2	31	0	0	0	0	0	0	0
1830	42	2	4	2	3	1		4	1	0	0	0	0	0	0	0	0	0	0	0	0	0	0	34	11	40	5	11	11	44	36	23	30	30	21	31	25	15	19	32	5	32	0	0	0	0	0	0	0
1831	44	1	1	3	3	4	4	3	3	0	0	0	0	0	0	0	0	0	0	0	0	0	0	41	14	57	10	9	8	68	58	30	21	30	28	36	32	31	19	6	6	22	0	0	0	0	0	0	0
1832	57	1	1	3	1	4	2	2	2	0	0	0	0	0	0	0	0	0	0	0	0	0	0	39	13	48	5	9	7	61	69	22	26	31	25	41	27	25	13	15	3	34	0	0	0	0	0	0	0
1833	50	2	1	3	2	4	2	2	3	0	0	0	0	0	0	0	0	0	0	0	0	0	0	39	14	58	0	7	8	51	49	18	25	34	19	32	23	20	15	9	5	26
1834	44	1	1	3	3	4	4	3	3	0	0	0	0	0	0	0	0	0	0	0	0	0	0	35	16	58	11	6	11	68	79	36	34	40	29	37	31	28	22	2	6	32	0	0	0	0	0	0	0
1835	52	2	4	1	3	4	2	4	3	0	0	0	0	0	0	0	0	0	0	0	0	0	0	43	14	55	5	11	8	60	74	30	30	37	27	34	30	26	21	7	2	48	0	0	0	0	0	0	0
1836	50	2	4	1	3	4	3	3	3	0	0	0	0	0	0	0	0	0	0	0	0	0	0	48	16	60	5	4	10	80	80	34	28	43	32	42	36	33	24	3	1	37	0	0	0	0	0	0	0
1837	49	2	1	3	3	4	3	3	3	0	0	0	0	0	0	0	0	0	0	0	1	0	1	39	13	49	4	11	10	69	70	29	26	28	28	30	35	25	16	6	9	29
1838	49	2	2	6	2	1		3	2	0	0	0	0	1	0	0	0	0	0	0	0	0	1	38	12	49	3	16	8	62	50	25	24	30	25	41	24	18	18	18	9	38	0	0	0	0	0	0	0
1839	54	2	1	3	3	4	3	2	3	0	0	1	0	0	0	0	0	0	0	0	0	0	1	39	15	47	6	12	12	60	75	31	26	33	24	38	32	29	21	6	8	45	0	0	0	0	0	0	0
1840	43	2	4	2	3	4	4	2	3	0	0	0	0	0	0	0	0	0	0	0	0	0	0	44	16	47	1	4	7	65	64	34	33	41	31	40	35	27	20	8	1	32
1841	51	1	2	1	3	4	4	4	4	0	0	0	0	0	0	0	0	0	0	0	0	0	0	44	16	48	5	7	8	70	63	30	31	30	29	40	32	31	21	12	4	32
1842	51	1	1	3	3	4	4	2	3	0	0	1	0	0	0	0	0	0	0	0	0	0	1	46	15	58	7	4	10	71	82	33	30	38	25	36	33	34	22	3	3	31	0	0	0	0	0	0	0
1843	44	2	4	1	3	4	3	3	2	0	0	0	0	0	0	0	0	0	0	0	0	0	0	22	11	43	0	10	5	39	79	29	28	30	28	31	27	18	18	0	5	29	0	0	0	0	0	0	0
1844	44	2	1	2	3	1		2	3	0	1	1	0	1	0	0	0	0	1	1	0	0	1	31	12	41	8	14	6	64	50	30	20	30	24	34	26	22	16	7	9	27	0	0	0	0	0	0	0
1845	60	1	2	2	3	4	3	1	2	0	0	0	0	0	0	0	0	0	0	0	0	0	0	37	11	39	2	14	10	76	63	26	27	28	26	37	31	22	19	14	15	17
1846	55	2	1	2	3	4	4	2	4	0	0	0	0	1	0	0	0	0	0	0	0	0	1	41	14	41	6	6	9	60	79	29	36	30	30	40	30	32
1847	55	2	2	4	3	4	3	3	4	0	0	0	0	0	0	0	0	0	0	1	0	0	1	39	12	53	7	11	9	79	60	26	17	43	25	42	31	33	22	12	8	19
1848	52	1	1	3	3	4	4	3	3	0	0	0	0	0	0	0	0	0	0	0	0	0	0	41	12	53	10	14	8	66	70	31	35	34	18	38	28	29	18	5	9	47	0	0	0	0	0	0	0
1849	51	2	1	2	3	4	2	3	3	0	0	0	0	0	0	0	0	0	0	0	0	0	0	34	12	40	5	12	8	66	66	27	30	42	22	35	28	28	16	9	7	40
1850	50	2	4	2	3	4	4	4	3	0	0	0	0	0	0	0	0	0	0	0	0	0	0	41	16	46	2	13	9	73	64	31	23	38	24	34	31	25	17	0	6	32
1851	64	2	1	2	3	4	3	3	3	0	0	0	0	1	0	0	0	0	0	0	0	0	1	33	14	49	3	8	13	55	66	30	30	36	24	29	29	23	22	14	12	31
1852	53	2	1	3	3	4	3	3	3	0	0	0	0	0	1	0	0	0	0	1	0	0	1	42	16	56	2	6	9	73	82	32	25	42	32	29	36	20	16	8	12	51
1853	57	2	2	4	2	4	2	3	2	1	0	0	0	0	0	0	0	0	0	0	0	0	1	42	12	53	1	12	9	61	63	29	30	31	27	38	30	28	16	11	9	39	0	0	0	0	0	0	0
1854	46	1	1	3	3	3	4	2	3	0	0	1	1	0	1	0	0	0	0	0	0	0	1	40	13	52	3	8	10									27
1855	53	2	2	4	3	4	3	3	2	0	0	1	0	0	1	0	0	0	0	0	0	0	1	35	13	34	2	7	9	57	57	19	32	32	24	41	24	34	23	5	8	52	0	0	0	0	0	0	0
1856	53	2	1	3	2	4	2	2	3	1	0	0	0	0	0	0	0	0	0	0	0	0	1	41	16	57	6	12	6	57	54	20	18	30	23	35	29	30	16	8	4	25	0	0	0	0	0	0	0
1857	43	2	1	3	3	4	4	3	3	0	0	0	0	0	0	0	0	0	0	0	0	0	0	39	15	50	4	9	5	54	46	22	23	27	20	29	22	22	18	9	9	37	0	0	0	0	0	0	0
1858	42	2	1	3	3	4	4	4	4	0	0	0	0	0	0	0	0	0	0	0	0	0	0	39	15	60	10	6	10	66	78	32	28	28	28	36	35	28	19	3	6	45
1859	42	1	1	3	3	4	4	4	3	0	0	0	0	0	0	0	0	0	0	0	0	0	0	36	16	60	3	4	8	72	74	29	27	31	27	35	32	31	22	3	2	40	0	0	0	0	0	0	0
1860	58	2	1	3	3	4	2	4	3	0	0	0	0	0	0	0	0	0	0	0	0	0	0	32	14	32	1	7	7	64	51	22	32	25	24	35	27	29	18	25	6	42	0	0	0	0	0	0	0
1861	46	2	1	3	2	1		2	3	0	0	0	0	0	0	0	0	0	0	0	0	0	0	39	13	59	2	7	12	52	75	26	27	42	28	38	28	29	17	3	7	29	0	0	0	0	0	0	0
1862	57	2	1	3	3	4	2	4	3	0	0	1	1	0	0	0	0	0	0	0	0	1	1	39	12	56	6	6	11	28	58	33	30	39	30	35	34	30	16	2	6	47	0	0	0	0	0	0	0
1863	46	1	4	3	3	4	4	3	3	0	0	0	0	0	0	0	0	0	0	0	0	0	0	45	16	60	11	5	10	59	85	35	35	41	30	42	36	35	16	2	2	30
1864	43	1	1	3	3	4	4	3	3	0	0	0	0	0	0	0	0	0	0	0	0	0	0	48	14	45	6	4	9	55	70	36	35	30	27	32	24	17	22	5	4	29	0	0	0	0	0	0	0
1865	50	1	2	1	2	4	2	3	3	0	0	0	0	0	0	0	0	0	0	0	0	0	0	39	15	54	10	9	7									28
1866	52	2	2	4	3	4	3	3	2	0	0	1	0	0	0	0	0	0	0	0	0	0	1	35	15	54	8	8	10	53	66	29	31	41	27	33	25	25	16	7	5	46
1867	45	2	1	3	3	4	3	3	3	0	0	0	0	0	0	0	0	0	0	0	0	0	0	44	14	57	8	7	10	58	57	27	24	31	23	28	26	23	21	9	2	40	0	0	0	0	0	0	0
1868	44	1	1	3	3	4	2	2	4	1	0	0	0	0	0	0	0	0	0	0	0	0	1	26	11	60	1	11	7	45	66	25	21	34	25	29	23	24	15	7	5	36	0	0	0	0	0	0	0
1869	47	1	1	3	3	3	3	4	3	0	0	0	0	0	0	0	0	0	0	0	0	0	0	35	15	59	9	8	9	60	53	26	13	32	20	30	28	22	14	4	1	29	0	0	0	0	0	0	0
1870	48	2	2	4	3	4	2	3	2	0	0	0	1	0	1	0	0	0	0	0	0	0	1	31	11	54	4	6	5	56	52	22	16	28	28	28	20	18	15	12	9	20	0	0	0	0	0	0	0
1871	62	1	1	6	3	3	2	2	2	0	0	0	0	1	0	0	0	0	0	0	0	0	1	30	12	38	2	10	11	49	63	23	24	35	26	38	22	23	17	13	6	23	0	0	0	0	0	0	0
1872	56	2	1	3	3	4	3	3	3	0	0	0	0	0	0	0	0	0	0	0	0	0	0	45	14	54	6	15	10	70	79	33	35	30	30	38	35	24	21	7	9	32
1873	65	2	4	1	3	3	4	3	2														0	37	16	47	8	4	12	54	63	24	32	32	27	29	28	22	17	4	9	36
1874	58	1	1	3	3	4	4	4	4	0	0	0	0	0	0	0	0	0	0	0	0	0	0	32	14	44	7	19	9	50	43	21	27	30	27	29	20	19	16	19	12	10	0	0	0	0	0	0	0
1875	44	2	1	3	3	4	3	2	2	0	0	0	1	0	0	0	0	0	0	0	0	0	1	40	16	52	5	6	8	60	63	34	35	36	28	40	27	27	20	5	7	43	0	0	0	0	0	0	0
1876	50	2	1	3	3	4	4	4	3	0	0	0	0	0	0	0	0	0	0	0	0	0	0	43	14	47	1	6	5	65	73	34	33	37	25	31	29	22	17	8	2	42	0	0	0	0	0	0	0
1877	42	2	1	3	1	3	1	2	2	0	0	0	0	0	0	0	0	0	0	0	0	0	0	32	15	53	0	5	8									21
1878	45	2	4	1	3	4	3	4	2	0	0	0	0	0	0	0	0	0	0	0	0	0	0	38	14	51	5	7	11	69	73	28	31	37	27	39	30	25	18	2	4	40	0	0	0	0	0	0	0
1879	51	2	1	3	3	3	3	4	4	0	0	0	0	0	0	0	0	0	0	0	0	0	0	40	13	46	5	12	11	75	72	33	33	39	30	40	34	28	20	11	8	55
1880	57	2	1	2	3	4	4	3	4	0	0	0	0	0	0	0	0	0	0	0	0	0	0	48	15	58	7	7	11	76	87	36	36	42	31	40	36	30	22	2	3	47	0	0	0	0	0	0	0
1881	50	2	1	3	3	3	3	4	4	0	0	0	0	0	0	0	0	0	0	0	0	0	0	41	15	38	5	6	9	63	58	28	26	29	24	29	28	24	18	3	4	34
1882	42	2	1	2	3	4	4	4	3	0	0	0	0	0	0	0	0	0	0	0	0	0	0	32	10	20	5	17	10	59	27	21	18	32	26	42	32	32	21	33	14	22	0	0	0	0	0	0	0
1883	42	2	1	3	3	1		3	3	0	0	0	0	0	0	0	0	0	0	0	0	0	0	34	14	56	10	18	12	59	74	26	34	40	27	39	27	23	17	5	7	44	0	0	0	0	0	0	0
1884	50	1	1	3	2	4	2	3	3	1	0	0	0	0	0	0	0	0	0	0	0	0	1	36	16	55	4	5	10	74	69	24	18	38	28	31	28	27	21	0	4	35
1885	48	2	1	3	2	4	2	3	3	0	0	0	0	0	0	0	0	0	0	0	0	1	1	40	16	60	1	4	9	79	76	34	17	43	30	25	33	19	12	0	2	37	0	0	0	0	0	0	0
1886	54	2	1	3	2	4	2	3	3	0	0	0	0	1	0	0	0	0	0	0	0	0	1	39	12	49	5	6	9	64	64	24	36	46	31	40	35	29	18	12	9	38
1887	45	2	4	1	3	4	4	2	3	0	0	0	0	0	0	0	0	0	0	0	0	0	0	37	10	36	6	10	10	52	81							23
1888	50	1	1	3	3	4	4	3	3	0	0	0	0	0	0	0	0	0	0	0	0	0	0	42	14	49	6	12	8	62	59	26	25	28	22	34	23	21	21	11	5	37
1889	58	2	1	3	3	4	4	3	3	0	0	0	0	0	0	0	0	0	0	0	0	0	0	34	12	58	3	7	6	48								21
1890	50	2	1	3	3	4	3	3	3	0	0	0	0	0	0	0	0	0	0	0	0	0	0	43	15	56	7	8	9	55	74	28	32	29	25	36	31	31	17	7	2	39	0	0	0	0	0	0	0
1891	63	2	1	3	2	3	2	1	3	0	1	0	0	1	0	0	0	0	0	0	0	0	1	37	13	46	5	9	13	48	53	25	16	23	20	39	29	25	14	14	11	24	0	0	0	0	0	0	0
1892	43	2	4	3	3	4	3	4	3	0	0	0	0	0	0	0	0	0	0	0	0	0	0	39	16	49	1	10	5	59	71	27	30	27	24	26	25	23	17	11	4	34	0	0	0	0	0	0	0
1893	47	2	2	4	3	4	3	3	2	0	0	0	0	0	0	0	0	0	0	0	0	0	0	37	13	49	6	8	12	62	75	27	32	33	26	32	31	23	18	13	7	45
1894	48	2	1	3	3	4	3	4	3	1	1	0	0	0	0	0	0	0	0	0	0	0	1	34	12	49	1	12	6	51	55	18	26	23	17	25	17	17	16	25	8	29
1895	53	2	1	2	3	2		4	2	0	0	1	0	0	0	0	0	0	1	0	0	0	1	46	15	57	5	4	8									28
1896	46	2	1	3	3	3	3	2	3	0	0	0	0	0	0	0	0	0	0	0	0	0	0	40	12	46	8	6	10	56	37	19	32	30	23	38	26	26	23	22	5	32
1897	53	2	2	4	1	1		3	2	0	0	0	0	0	1	0	0	0	0	0	0	0	1	39	14	42	7	11	8	54	63	21	29	32	25	36	24	21
1898	48	1	4	1	3	4	2	3	2	0	0	1	1	0	0	0	0	0	0	0	0	0	1	36	13	39	5	18	12	54	81	34	36	42	30	42	33	26	25	0	8	41	0	0	0	0	0	0	0
1899	60	2	1	2	3	1		4	4	0	0	0	0	0	0	0	0	0	0	0	0	0	0	44	15	56	4	9	9	76	76	36	35	40	31	38	36	28	22	2	5	49	0	0	0	0	0	0	0
1900	66	1	2	1	3	2		2	2	0	0	0	0	0	0	0	0	0	1	0	0	0	1	33	12	37	3	9	8	40	43	7	10	31	21	20	17	13	17	10	4	7	0	0	0	0	0	0	0
1901	53	2	1	3	2	3	2	2	3	0	0	0	0	0	0	0	0	0	0	0	0	0	0	35	12	56	5	6	10	61	36	19	33	41	20	28	23	23	13	20	5	30	0	0	0	0	0	0	0
1902	62	1	2	1	2	4	1	2	3	1	0	1	0	0	0	0	0	0	0	0	0	0	1	40	13	43	5	10	8	64	69	24	22	33	20	39	22	23	11	9	1	36
1903	56	1	1	3	3	4	3	3	3	0	0	0	0	0	0	0	0	0	0	0	0	0	0	39	14	52	2	7	7	58	67	30	29	36	27	36	30	26	21	14	7	44	0	0	0	0	0	0	0
1904	56	2	1	3	3	4	4	3	4	1	0	1	0	1	0	0	0	0	0	1	0	0	1	41	13	45	5	7	6	65	76	28	30	35	28	28	31	28	19	11	7	47
1905	59	2	1	2	3	4	3	2	3	0	0	0	0	0	0	0	0	0	0	0	0	0	0	43	16	53	9	4	11	70	77	30	34	36	30	32	35	32	19	5	1	32	0	0	0	0	0	0	0
1906	54	2	4	4	3	4	4	4	3	1	0	0	0	0	0	0	0	0	0	0	0	0	1	42	15	55	1	6	12	72	82	36	36	32	31	38	35	35	23	8	5	52	0	0	0	0	0	0	0
1907	59	1	1	3	2	4	1	3	4	0	0	0	0	0	0	0	0	0	0	0	0	0	0	25	15	56	0	14	7	73	77	25	28	43	29	35	29	18	13	4	9	33
1908	51	1	1	3	3	4	3	4	3	0	0	0	0	0	0	0	0	0	0	0	0	0	0	41	16	55	2	8	9	63	82	33	36	41	29	35	33	23	21	2	5	39	0	0	0	0	0	0	0
1909	49	1	4	3	3	3	4	4	3	0	0	0	0	0	0	0	0	0	0	0	0	0	0	38	15	53	7	11	9	66	82	35	34	38	31	40	34	30	17	6	6	35
1910	56	2	1	2	3	4	3	1	3	0	0	0	0	0	1	0	0	0	0	1	0	0	1	39	16	57	3	7	9	67	79	36	30	43	30	38	35	30	16	3	4	36
1911	46	2	1	3	3	4	4	2	4	0	0	0	0	0	0	0	0	0	0	0	0	0	0	37	14	56	2	4	10	60	64	28	26	29	24	40	28	26	19	7	3	41	0	0	0	0	0	0	0
1912	49	2	1	3	3	4	2	4	4	0	0	0	0	1	0	0	0	0	0	0	0	0	1	37	12	60	5	10	6	60	65	28	28	32	28	28	31	20	15	8	7	47
1913	56	1	1	3	2	4	2	3	3	0	0	1	0	1	0	0	0	0	0	0	0	0	1	27	12	48	10	5	11	51	59	23	23	27	20	25	28	28	11	17	6	27
1914	57	2	1	3	3	3	1	3	3	0	0	0	0	0	0	0	0	0	0	0	0	0	0	31	10	39	4	16	10	41	37	18	15	17	18	17	14	11	11	15	7	41	0	0	0	0	0	0	0
1915	61	1	1	3	3	2		2	3	0	0	1	0	0	0	0	0	0	0	0	0	0	1	36	14	47	6	10	8	69	73	27	23	34	21	30	33	34	14	8	6	41	0	0	0	0	0	0	0
1916	56	2	1	3	3	3	3	3	3	0	0	0	0	0	0	0	0	0	0	0	0	0	0	45	16	60	6	4	11	78	85	34	36	42	30	41	36	34	25	0		53	0	0	0	0	0	0	0
1917	62	1	1	3	2	4	2	3	3	0	0	1	0	1	0	0	0	0	0	0	0	0	1	31	14	43	1	8	8	57	58	24	21	29	22	24	28	27	15	7	7	30	0	0	0	0	0	0	0
1918	57	2	1	3	3	4	3	3	3	0	0	1	0	0	0	0	0	0	0	0	0	0	1	39	10	54	5	11	9	44	55	23	21	30	19	23	19	19	19	16	8	30	0	0	0	0	0	0	0
1919	55	2	1	2	3	4	2	1	2	0	0	0	0	0	0	0	0	0	0	0	0	1	1	47	16	59	6	5	11	79	86	34	36	38	31	39	35	34	24	13	4	46	0	0	0	0	0	0	0
1920	58	1	1	3	3	4	4	1	3	0	0	0	0	1	0	0	0	0	0	1	0	0	1	34	15	53	5	15	7	69	73	31	30	37	28	38	34	31	22	1	8	48	0	0	0	0	0	0	0
1921	56	2	4	5	3	4	2	2	2	0	0	0	0	0	0	0	0	0	0	0	0	0	0	41	13	60	6	4	9	51	64	24	28	31	25	28	24	27	21	3	6	45
1922	64	2	1	2	3	2		3	3	0	0	1	0	0	0	0	0	0	0	0	0	0	1	44	16	60	9	6	12	76	76	36	36	38	31	37	36	26	21	3	9	38	0	0	0	0	0	0	0
1923	52	2	2	1	3	4	1	3	2	0	0	0	0	0	1	0	0	0	0	0	0	0	1	39	16	56	4	9	11	61	80	29	20	29	26	41	26	28	16	4	8	38	0	0	0	0	0	0	0
1924	64	2	1	3	3	4	3	2	3	0	0	0	0	0	0	0	0	0	0	0	0	1	1	32	13	45	4	7	10	60	72	30	36	37	28	34	32	26	21	9	5	49	0	0	0	0	0	0	0
1925	48	2	4	1	3	4	3	3	3	0	1	0	0	0	0	0	0	0	0	0	0	0	1	47	13	53	6	5	11	64	68	33	35	26	30	39	31	31	19	7	4	40
1926	49	1	1	2	3	4	3	4	3	0	0	0	0	0	0	0	0	0	0	0	0	0	0	32	12	48	8	18	10	39	31	14	23	33	24	31	13	30	16	6	12	32
1927	53	2	1	3	3	4	3	4	3	0	0	0	0	0	0	0	0	0	0	0	0	0	0	41	16	50	8	5	9	49	70	29	22	31	25	29	27	27	13	3	1	37
1928	59	2	1	6	3	4	4	3	3	0	0	1	0	0	0	0	0	0	0	0	0	0	1	39	14	45	7	14	11	72	56	27	30	38	26	33	33	24	21	10	5	32
1929	48	1	2	1	3	4	3	3	3	0	0	0	0	0	0	0	0	0	0	0	0	0	0	49	16	60	15	6	13	67	76	26	28	35	27	35	30	26	22	0	3	40	0	0	0	0	0	0	0
1930	45	1	2	4	2	4	2	4	3	0	0	0	0	0	0	0	0	0	0	0	0	0	0	45	15	54	8	6	11	61	82	34	36	36	31	33	36	30	15	2	5	37	0	0	0	0	0	0	0
1931	64	2	1	3	3	2		3	3	0	0	0	0	0	0	0	0	0	0	0	0	0	0	35	12	45	6	8	11	59	65	28	28	36	27	35	30	25	18	16	4	34
1932	44	2	1	3	3	4	2	4	3	0	0	0	0	0	0	0	0	0	0	0	0	0	0	34	14	47	1	14	7	63	38	22	21	27	23	25	24	21
1933	54	1	1	3	3	4	3	3	3	1	0	0	0	0	0	0	0	0	0	0	0	0	1	29	15	43	0	9	9	55	56	27	24	26	26	34	31	26	13	10	11	28	0	0	0	0	0	0	0
1934	62	1	2	6	3	4	2	2	3	0	0	1	0	0	0	0	0	0	0	0	0	0	1	35	15	60	2	6	11	66	64	28	27	39	30	42	33	33	16	1	3	28	0	0	0	0	0	0	0
1935	46	1	2	2	3	4	4	3	2	0	0	0	0	0	0	0	0	0	0	0	0	0	0	47	16	58	10	5	11	70	68	36	35	43	31	41	32	28	21	0	3	47	0	0	0	0	0	0	0
1936	43	1	1	3	3	4	3	4	3	0	0	0	0	0	0	0	0	0	0	0	0	0	0	49	16	54	4	4	7	65	73	27	24	27	23	32	26	22	22	0	2	39	0	0	0	0	0	0	0
1937	52	2	2	4	3	4	2	3	2	0	0	0	0	0	0	0	0	0	0	0	0	0	0	36	11	47	7	13	11	56	41	25	29	32	20	36	17	26	16	20	9	45
1938	60	2	1	3	3	4	3	3	3	0	0	1	0	0	0	0	0	0	0	0	0	0	1	32	13	52	7	6	10	68	67	30	36	44	32	37	34	29	21	2	5	37	0	0	0	0	0	0	0
1939	52	2	1	2	3	4	3	2	3	0	0	1	0	0	0	0	0	0	0	0	0	0	1	42	14	48	5	13	9	70	71	30	34	28	26	29	30	25	20	2	7	52	0	0	0	0	0	0	0
1940	47	2	4	2	2	3	2	3	3	0	0	1	0	0	0	0	0	0	0	0	0	0	1	42	15	54	6	9	7	60	63	26	23	35	24	34	27	28	17	21	6	38
1941	45	1	1	3	3	4	3	3	3	1	0	0	0	0	0	0	0	0	0	0	0	0	1	42	14	58	3	8	4	57	53	22	19	29	20	33	24	24	23	6	4	40
1942	45	2	4	3	3	4	3	3	3	0	0	1	0	0	0	0	0	0	0	0	0	0	1	38	13	56	5	6	7	54	72	28	31	37	26	33	28	24	18	7	4	41	0	0	0	0	0	0	0
1943	52	2	1	3	3	4	2	3	3	0	0	0	0	0	0	0	0	0	0	0	1	0	1	41	13	55	9	11	9	58	55	21	15	29	28	41	26	26	13	5	10	32	0	0	0	0	0	0	0
1944	63	1	2	3	1	2		3	2	1	0	0	0	1	0	0	0	0	0	0	0	0	1	31	15	56	8	7	12	62	77	32	30	37	26	42	30	24	15	12	7	19	0	0	0	0	0	0	0
1945	55	1	1	3	3	3	4	2	4	0	0	0	0	1	0	0	0	0	1	0	0	0	1	35	12	34	10	15	12	65	51	27	22	30	23	41	31	25	18	12	10	38
1946	60	2	2	1	3	3	3	4	2	0	0	0	0	0	0	0	0	0	0	0	0	0	0	42	16	60	11	5	11	75	69	30	15	39	27	34	36	33	20	9	9	26	0	0	0	0	0	0	0
1947	54	2	4	2	2	1		3	1	0	0	0	0	1	0	0	0	0	0	1	0	0	1	30	14	39	6	11	12	73	72	31	31	43	26	42	35	32	17	1	4	38	0	0	0	0	0	0	0
1948	55	2	1	3	3	4	3	4	3	0	0	0	0	1	0	0	0	0	0	0	0	0	1	39	12	35	4	13	9	71	76	25	26	25	25	35	17	25	17	12	9	45	0	0	0	0	0	0	0
1949	61	1	1	3	3	4	4	2	3	0	0	1	0	0	0	0	0	0	0	0	0	0	1	38	13	60	7	6	12	68	81	31	35	31	29	42	33	32	19	2	6	35	0	0	0	0	0	0	0
1950	45	2	4	2	3	1		4	3	0	0	0	0	0	0	0	0	0	0	0	0	0	0	32	13	53	9	7	10	71	70	28	36	33	30	40	34	31	24	4	5	48	0	0	0	0	0	0	0
1951	64	2	1	3	1	4	1	3	3	0	0	0	0	0	0	0	0	0	0	0	0	0	0	36	14	49	1	7	7	62	68	32	33	38	26	40	31	27	12	12	2	44	0	0	0	0	0	0	0
1952	52	2	4	5	3	1		4	2	0	0	0	0	1	0	0	0	0	0	0	0	0	1	35	14	59	1	5	7	55	56	19	24	32	26	32	20	19	15	12	1	33
1953	62	2	1	3	3	4	2	3	2	0	0	1	0	0	0	0	0	0	0	0	0	0	1	36	12	49	6	6	12	67	72	26	36	42	30	39	31	24	19	9	2	40
1954	45	2	1	3	3	4	1	2	3	0	0	0	0	0	0	0	0	0	0	0	0	0	0	42	12	27	8	15	12	71								26
1955	43	2	4	1	2	3	1	4	1	0	0	0	0	0	0	0	0	0	0	0	0	0	0	44	15	50	6	6	9	47	56	27	32	39	31	39	23	20	17	2	5	50
1956	48	1	4	2	3	4	3	4	3	1	1	1	0	0	0	0	0	0	0	0	0	0	1	32	15	42	3	18	8	59	60	27	18	31	25	34	27	22	19	17	14	29	0	0	0	0	0	0	0
1957	59	1	1	2	2	4	2	4	3	0	0	0	0	0	0	0	0	0	0	1	0	0	1	34	14	51	4	6	8	51	65	26	31	31	26	26	24	23	11	13	7	34
1958	54	1	1	2	3	4	4	2	3	1	0	0	0	0	0	0	0	0	0	0	0	0	1	39	16	60	0	5	8									30
1959	43	1	1	3	2	4	2	2	2	0	0	0	0	0	0	0	0	0	0	0	0	0	0	32	15	59	5	5	9	53	54	29	29	35	25	34	26	26	15	5	4	38	0	0	0	0	0	0	0
1960	60	2	3	4	3	2		4	3	0	0	0	0	1	0	0	0	0	0	0	0	0	1	26	15	53	2	6	10	58	69	32	32	31	24	36	28	22	17	3	5	38
1961	49	2	4	2	3	4	3	4	3	0	0	0	0	0	0	0	0	0	0	0	0	0	0	39	15	53	3	6	8	55	67	23	31	38	26	33	27	24	24	15	7	40	0	0	0	0	0	0	0
1962	59	1	1	2	2	3	2	4	3	1	0	0	0	0	1	0	0	0	0	0	0	0	1	36	16	60	4	9	11	69	69	31	36	28	31	42	34	29	16	3	4	36	0	0	0	0	0	0	0
1963	58	2	1	6	3	4	4	2	2	0	0	0	0	0	0	0	0	0	0	0	0	0	0	40	12	43	3	6	10	60	59	26	31	28	28	42	31	26	23	13	6	40
1964	47	2	1	3	3	4	4	2	3	0	0	0	0	0	0	0	0	0	0	0	0	0	0	44	13	57	3	4	10	56	72	28	24	44	26	30	24	17	21	8	4	34	0	0	0	0	0	0	0
1965	43	2	2	4	3	4	4	4	3	0	0	0	0	0	0	0	0	0	0	0	0	0	0	37	14	51	9	10	9	61	64	30	34	29	26	39	29	27	17	12	6	49	0	0	0	0	0	0	0
1966	52	2	1	3	2	4	2	4	3	0	0	0	0	0	0	0	0	0	0	0	0	0	0	26	9	46	0	17	8	61	64	24	19	41	24	29	23	29	11	17	6	22	0	0	0	0	0	0	0
1967	61	1	2	1	3	4	3	3	3	1	0	0	0	0	0	0	0	0	1	0	0	0	1	30	11	36	1	18	5	68	40	21	16	34	23	33	27	29	15	33	10	33
1968	61	1	1	3	3	1		4	2	0	0	0	0	0	0	0	0	0	0	0	0	0	0	44	16	54	15	7	7	70	70	33	32	35	29	41	34	28	21	2	6	38	0	0	0	0	0	0	0
1969	56	1	2	1	3	3	3	4	1	0	0	1	0	0	0	0	0	0	0	0	0	1	1	30	5	38	9	8	9	42	44	14	23	31	18	20	16	14	18	45	7	38	0	0	0	0	0	0	0
1970	60	1	1	3	3	3	3	2	4	1	0	1	0	0	0	0	0	0	0	0	0	0	1	42	16	60	5	6										27
1971	46	2	2	4	3	4	4	3	3	0	0	1	0	0	0	0	0	0	0	0	0	0	1	33	12	48	4	7										24
1972	47	2	1	3	3	4	3	3	3	0	0	1	0	0	0	0	0	0	0	0	0	0	1	36	12	58	3	4		63								28
1973	43	2	1	3	3	4	4	3	3	0	0	0	0	0	0	0	0	0	0	0	0	0	0	38	14	43	4	11										23
1974	42	2	1	3	3	3	3	4	3	0	0	1	0	0	0	0	0	0	0	0	0	0	1	31	14	48	4	5										27
1975	48	1	2	4	3	4	3	2	2	0	0	0	0	0	0	0	0	0	0	0	0	0	0	41	15	46	9	5										28
1976	49	2	1	2	2	4	4	3	4	1	0	1	1	0	0	0	0	0	0	0	0	0	1	40	14	50	0	7										29
1977	46	2	4	5	2	3	1	2	2	0	0	0	0	0	0	0	0	0	0	0	0	0	0	32	9	37	4	12										22
1978	59	1	1	3	2	4	2	4	3	1	0	0	0	0	0	0	0	0	0	0	0	0	1	42	12	58	9	5										27
1979	43	2	1	3	3	2		3	3	1	0	0	0	0	0	0	0	0	0	0	0	0	1	36	13	54	0	9										26
1980	58	2	1	3	3	4	3	2	2	0	0	0	0	0	1	0	0	0	0	0	0	0	1	48	12	43	6	4										32
1981	46	2	1	3	3	3	3	3	4	0	0	0	0	1	0	0	0	0	0	0	0	0	1	40	12	57	6	8										34
1982	48	2	4	2	3	4	4	4	2	0	0	0	0	0	0	0	0	0	0	0	0	0	0	42	12	47	8	4										22
1983	45	1	2	4	3	4	4	3	3	0	0	0	0	0	0	0	0	0	0	0	0	0	0	34	13	43	7	6										31
1984	52	2	1	3	3	1		4	4	0	0	1	0	0	0	0	0	0	0	0	0	0	1	42	14	60	7	5										29
1985	48	2	1	3	2	4	2	4	3	0	0	0	0	0	0	0	0	0	0	0	0	0	0	42	14	46	4	12										22
1986	61	2	1	3	1	1		1	2	1	0	0	1	0	0	0	0	0	0	0	0	0	1	33	14	35	4	9										25
1987	47	2	4	4	1	1		2	1	0	0	0	0	0	0	0	0	0	0	0	0	0	0	41	15	57	10	5										29
1988	50	1	4	6	2	4	2	2	2	0	0	0	0	0	0	0	0	0	0	0	0	0	0	36	14	60	2	6										26
1989	55	2	1	3	2	4	2	3	2	1	0	0	0	1	0	0	0	0	0	1	0	0	1	29	11	48	6	7										26
1990	53	1	1	3	2	4	2	4	3	0	0	0	0	0	0	0	0	0	1	0	0	0	1	36	15	53	6	9	11	40	42	9	14	27	19	13	10	15	11	11	10	20	0	0	0	0	0	0	0
1991	47	2	1	3	3	4	4	4	4	1	0	0	0	0	0	0	0	0	0	0	0	0	1	38	12	60	4	10	5	73	75	35	36	43	31	42	33	24	27	6	10	33
1992	55	2	2	1	2	4	2	3	2	0	0	0	0	1	0	0	0	0	0	0	0	0	1	16	4	22	1	22	12	60	70	30	34	41	20	40	30	17	19	5	11	40	0	0	0	0	0	0	0
1993	46	2	1	3	3	3	3	2	4	0	0	0	0	0	0	0	0	0	0	0	0	0	0	39	14	45	5	7	8	70	65	32	35	35	27	38	36	30	23	9	5	48
1994	64	1	1	2	2	1		4	1	1	0	1	0	0	0	0	0	0	0	0	0	0	1	35	12	49	12	5	10	53	49	24	19	26	21	26	24	21	12	22	7	23
1995	48	2	1	2	2	4	2	4	3	0	0	0	0	0	0	0	0	0	0	0	0	0	0	28	11	44	5	17	3	59								19
1996	54	2	1	3	2	4	4	2	3	0	0	0	0	0	0	0	0	0	0	0	0	0	0	43	14	57	3	5	10	67	68	29	36	32	27	42	31	25	19	17	4	36	0	0	0	0	0	0	0
1997	63	2	3	6	3	4	4	1	3	0	0	1	0	0	0	0	0	0	0	1	0	0	1	36	16	55	10	15	10	54	64	30	33	38	29	34	21	19	27	12	10	52	0	0	0	0	0	0	0
1998	55	2	2	1	3	1		1	1	0	0	0	0	0	0	0	0	0	0	0	0	0	0	40	15	55	7	12	10	59	62	22	30	36	27	42	27	31	23	2	4	36
1999	66	2	1	3	3	2		2	3	0	0	0	0	0	0	0	0	0	0	0	0	0	0	44	15	41	5	7	10									28
[truncated: 2,687 more rows]
[truncated: 20 more columns]
